# Supplementary material for: Carbene functionalization of porphyrinoids through tosylhydrazones
Source: Royal Society of Chemistry journal article supplement (doi:10.1039/d1ob01626a), 2021-01-01
Supplement: d1ob01626a1.pdf [file d1ob01626a1.pdf]

## Electronic Supplementary Information

### Carbene functionalization of porphyrinoids through tosylhydrazones.

Grigory L. Kozhemyakin,<sup>a</sup> Vladimir S. Tyurin,<sup>\*a</sup> Alena O. Shkirdova,<sup>a</sup> Evgeny S. Belyaev,<sup>a</sup> Ekaterina S. Kirinova,<sup>a</sup> Geli V. Ponomarev,<sup>b</sup> Alexey A. Chistov,<sup>c</sup> Andrey V. Aralov,<sup>c</sup> Victor A. Tafeenko,<sup>d</sup> and Ilya A. Zamilatskov <sup>\*a</sup>

<sup>a</sup>A.N. Frumkin Institute of Physical Chemistry and Electrochemistry of the Russian Academy of Sciences, Leninskiy prospect, 31-4, Moscow, 119071, Russian Federation.

<sup>b</sup>Research Institute of Biomedical Chemistry, Pogodinskaya street, 10-8, 119121, Moscow, Russian Federation

<sup>c</sup>Shemyakin-Ovchinnikov Institute of Bioorganic Chemistry, Miklukho-Maklaya str., 16/10, 117997, Moscow Russian Federation

<sup>d</sup>Chemistry Department, Moscow State University, Leninskiye Gory, 1-3, 119899 Moscow, Russian Federation

### Contents

|                                                               |    |
|---------------------------------------------------------------|----|
| 1. Synthesis and characteristics of the synthesized compounds | 2  |
| 2. X-ray diffraction study                                    | 6  |
| 3. NMR spectra                                                | 16 |
| 4. UV-Vis absorption spectra                                  | 33 |
| 5. DFT calculations of the reaction intermediates             | 34 |
| 6. References                                                 | 84 |

## Synthesis and characteristics of the synthesized compounds

**General.** Reactions were carried out under argon atmosphere using commercially available reagents that were purchased and used as received. Starting coprohemin I and II were synthesized according to the published procedure [1]. The heating of the reaction vessels was performed with oil bath. Column chromatography was performed using 40-63  $\mu\text{m}$  silica gel, preparative thin layer chromatography (TLC) was performed using glass plates coated with 5-40  $\mu\text{m}$  silica gel (5 mm thick). The reaction progress was monitored by TLC using aluminum-backed Silica Gel 60 F254 pre-coated plates. HPLC purification was performed on Agilent 1100 preparative system using the column YMC-Actus Triart C8 250 $\times$ 20 mm, 5  $\mu\text{m}$ , 12 nm.  $^1\text{H}$  and  $^{13}\text{C}$  NMR spectra were recorded on a Bruker Avance III 600 MHz spectrometer at room temperature in  $\text{CDCl}_3$ . Chemical shifts were reported relative to signal of residual proton of  $\text{CDCl}_3$  (7.26 ppm). High-resolution mass spectra (HRMS) were recorded using a Bruker microTOF II focus spectrometer (ESI). Electronic absorption spectra were recorded with U-2900 (Hitachi) spectrophotometer in quartz rectangular cells of 10 mm path length. Quantum-chemical calculations of geometry and electronic structure were made with the software package Gaussian 09W [2] using density functional theory (DFT) method with the hybrid correlation-exchange functional B3LYP. Fine integration grid was used for numerical integrations. All electron 6-31G(d) basis set was used for light atoms and LanL2DZ basis set was used for Ni atom. The geometry of all studied molecules was fully optimized, the absence of imaginary frequencies confirmed their stationary character. After the procedure of optimization of geometrical parameters wave function stability tests were carried out then calculation of thermochemical parameters was performed.

Starting *meso*-formyl- $\beta$ -octaalkylporphyrinoids **5b-8b** were prepared from the corresponding  $\beta$ -octaalkylporphyrinoids **5a-8a** using reported procedures.<sup>1, 2</sup> Tosylhydrazones of the porphyrinoids were prepared using previously reported procedure with minor modifications.<sup>2</sup>

### General procedure for the preparation of N-tosylhydrazones of pyropheophorbides on the example of the N-tosylhydrazone of methyl pyropheophorbide-*d* 3.

To a solution of methyl pyropheophorbide-*d* **1** (200 mg, 0.36 mmol) in  $\text{CH}_2\text{Cl}_2$  (30 ml) *para*-toluenesulfonyl hydrazide (74 mg, 0.40 mmol) and trifluoroacetic acid (30  $\mu\text{l}$ , 0.39 mmol) were added. The reaction mixture was stirred at 45 $^\circ\text{C}$  for 24 hours. The mixture was diluted with  $\text{CH}_2\text{Cl}_2$  (100 ml), washed with water (2 x 50 ml), dried over  $\text{Na}_2\text{SO}_4$  and concentrated *in vacuo*. The product was purified by preparative TLC ( $\text{CH}_2\text{Cl}_2/\text{EtOH} = 100:1$ ) yielding N-tosylhydrazone of methyl pyropheophorbide-*d* **3** (196 mg, 76%) as a dark brown powder.

#### N-tosylhydrazone of methyl pyropheophorbide-*d* 3

$^1\text{H}$  NMR (600 MHz,  $\text{CDCl}_3$ ),  $\delta$ , ppm: 9.62 (1H, s, 5-H), 9.21 (1H, s, 10-H), 8.89 (1H, s, CH=N), 8.47 (1H, s, 20-H), 8.15 (2H, m, 2,6-CH (Tosyl)), 7.31 (2H, m, 3,5-CH (Tosyl)), 6.75 (1H, s, 3<sup>1</sup>-NH), 5.28 (1H, d,  $J = 19.0$  Hz, 13<sup>2</sup>-H<sup>a</sup>), 5.12 (1H, d,  $J = 19.0$  Hz, 13<sup>2</sup>-H<sup>b</sup>), 4.45 (1H, m, 18-H), 4.26 (1H, m, 17-H), 3.66 (3H, s, 12-CH<sub>3</sub>), 3.60 (3H, s, 17<sup>2</sup>-CO<sub>2</sub>CH<sub>3</sub>), 3.41 (2H, m, 8<sup>1</sup>-CH<sub>2</sub>), 3.33 (3H, s, 2-CH<sub>3</sub>), 2.94 (3H, s, 7-CH<sub>3</sub>), 2.71 (1H, m, 17<sup>1</sup>-H<sup>a</sup>), 2.60 (1H, m, 17<sup>2</sup>-H<sup>a</sup>), 2.36 (1H, m, 17<sup>2</sup>-H<sup>b</sup>), 2.31 (3H, s, CH<sub>3</sub>(Tosyl)), 2.28 (1H, m, 17<sup>1</sup>-H<sup>b</sup>), 1.78 (3H, d,  $J = 7.4$  Hz, 18-CH<sub>3</sub>), 1.56 (3H, t,  $J = 7.7$  Hz, 8<sup>2</sup>-CH<sub>3</sub>), -0.09 (1H, s, NH), -2.21 (1H, s, NH).  $^{13}\text{C}$  NMR (150 MHz,  $\text{CDCl}_3$ ),  $\delta$ , ppm: 196.2, 173.6, 170.6, 160.7, 155.0, 151.1, 148.8, 144.5, 144.3, 142.5, 139.8, 138.4, 136.7, 135.8, 135.2, 134.2, 130.8, 129.8, 128.8, 128.2, 128.1, 116.2, 106.4, 103.6, 98.9, 93.5, 51.9, 51.8, 49.7, 48.1, 31.0, 29.8, 29.7, 23.1, 21.5, 19.2, 17.2, 12, 0, 10.7, 10.9. HRMS (ESI),  $m/z$  found: 719.3001; calc.  $\text{C}_{40}\text{H}_{43}\text{N}_6\text{O}_5\text{S}$ :  $[\text{M}+\text{H}]^+$ , 719.3016. UV-Vis ( $\text{CH}_2\text{Cl}_2$ ):  $\lambda_{\text{max}}$ , nm (log  $\epsilon$  [ $\text{L mol}^{-1} \text{cm}^{-1}$ ])) 424 (5.03), 517 (4.17), 547 (4.12), 625 (3.96), 685 (4.81).

**N-tosylhydrazone of methyl pyropheophorbide-*a* 4.** The product (23 mg, 86%) was obtained as dark green solid from methyl pyropheophorbide-*a* **2** (20 mg, 0.037 mmol) and *para*-toluenesulfonyl hydrazide (15 mg, 0.12 mmol).

$^1\text{H}$  NMR (600 MHz,  $\text{CDCl}_3$ ),  $\delta$ , ppm: 9.71 (1H, c, 5-H), 9.59 (1H, c, 10-H), 8.79 (1H, c, 20-H), 8.23 (2H, m, CH (Tosyl)), 8.14 (1H, dd,  $J = 17.8$  Hz,  $J = 11.6$  Hz, 3<sup>1</sup>-H), 8.05 (1H, c, 13<sup>1</sup>-NH), 7.46 (2H, m, CH(Tosyl)), 6.35 (1H, d,  $J = 17.8$  Hz, 3<sup>2a</sup>-H), 6.21 (1H, d,  $J = 11.6$  Hz, 3<sup>2b</sup>-H), 5.42 (1H, d,  $J = 18.2$  Hz, 13<sup>2</sup>-H<sup>a</sup>), 5.29 (1H, d,  $J = 18.2$  Hz, 13<sup>2</sup>-H<sup>b</sup>), 4.61 (1H, k,  $J = 7.4$  Hz, 18-H), 4.39 (1H, m, 17-H), 3.79 (2H, k,  $J = 7.8$  Hz, 8<sup>1</sup>-CH<sub>2</sub>), 3.66 (3H, c, 12-CH<sub>3</sub>), 3.63 (3H, c, 17<sup>2</sup>-CO<sub>2</sub>CH<sub>3</sub>), 3.52 (3H, c, 2-CH<sub>3</sub>), 3.36 (3H, c, 7-CH<sub>3</sub>), 2.75 (1H, m, 17<sup>1</sup>-H<sup>a</sup>), 2.65 (1H, m, 17<sup>2</sup>-H<sup>b</sup>), 2.47 (3H, c, CH<sub>3</sub>(Tosyl)), 2.33 (2H, m, 17<sup>1</sup>-H<sup>b</sup>, 17<sup>2</sup>-H<sup>b</sup>), 1.85 (3H, d,  $J = 7.4$  Hz, 18-CH<sub>3</sub>), 1.75 (3H, t,  $J = 7.8$  Hz, 8<sup>2</sup>-CH<sub>3</sub>), -0.6 (1H, s, NH), -2.6 (1H, s, NH).  $^{13}\text{C}$  NMR (150 MHz,  $\text{CDCl}_3$ ),  $\delta$ , ppm: 173.7, 168.9, 160.8, 155.7, 152.4, 150.6, 144.2, 144.0, 139.6, 139.6, 136.2, 135.6, 135.1, 134.0, 132.6, 130.1, 129.6, 128.5, 126.3, 122.0, 104.6, 101.6, 98.0, 93.1, 52.5, 51.7, 49.6, 38.9, 30.9, 29.7, 29.6, 23.5, 21.6, 19.6, 17.6, 11.2. HRMS (ESI),  $m/z$  found: 717.3206; calc.  $\text{C}_{41}\text{H}_{45}\text{N}_6\text{O}_4\text{S}$ :  $[\text{M}+\text{H}]^+$ , 717.3223. UV-Vis ( $\text{CH}_2\text{Cl}_2$ ):  $\lambda_{\text{max}}$ , nm (log  $\epsilon$  [ $\text{L mol}^{-1} \text{cm}^{-1}$ ])) 410 (5.13), 507 (4.2), 614 (0.04), 614 (3.82), 672 (4.82).

### General procedure for the preparation of N-tosylhydrazones of the Ni (II) complexes of *meso*-formyl- $\beta$ -octaalkyltetrapyrroles (porphyrins and chlorins) on the example of the N-tosylhydrazone of Ni (II) *meso*-formyl- $\beta$ -octaethylporphyrin **5c**.<sup>2</sup>

To a solution of Ni (II) *meso*-formyl- $\beta$ -octaethylporphyrin **5a** (70 mg, 0.11 mmol) in  $\text{CH}_2\text{Cl}_2$  (20 ml) *para*-toluenesulfonylhydrazide (22 mg, 0.11 mmol) was added followed by the addition of trifluoroacetic acid (8  $\mu\text{l}$ , 0.1 mmol). The reaction mixture was stirred at 45 $^\circ\text{C}$  for 24 hours. The resulting solution was cooled to room temperature and the solvent was evaporated *in vacuo*. The products were purified by column chromatography on silica gel ( $\text{CH}_2\text{Cl}_2$  : MeOH = 100:1) yielding *Z*-isomer **Z-5c** (44 mg, 49% yield) and *E*-isomer **E-5c** (12 mg, 14% yield) of the N-tosylhydrazone of Ni (II) *meso*-formyl- $\beta$ -octaethylporphyrin **1c** as green powders.

#### Ni (II) (*Z*)-N'-(2,3,7,8,12,13,17,18-octaethylporphyrin-5-ylmethylene)-4-methylbenzenesulfonohydrazide **Z-5c**.

$^1\text{H}$  NMR (600 MHz,  $\text{CDCl}_3$ ),  $\delta$ , ppm: 1.54 (7H, t,  $\beta$ -CH<sub>3</sub>), 1.76 (7H, t,  $\beta$ -CH<sub>3</sub>), 1.84 (13H, dt,  $\beta$ -CH<sub>3</sub>), 2.46 (3H, s, CH<sub>3</sub>(Tosyl)), 3.54 (2H, m,  $\beta$ -CH<sub>2</sub>), 3.68 (3H, m,  $\beta$ -CH<sub>2</sub>), 3.77 (2H, m,  $\beta$ -CH<sub>2</sub>), 3.92 (11H, m,  $\beta$ -CH<sub>2</sub>), 6.03 (1H, s, NH), 7.18 (2H, d, CH(Tosyl)), 7.40 (2H, d, CH(Tosyl)), 9.59 (2H, s, 10,20-CH), 9.62 (1H, s, 15-CH), 9.93 (1H, s, CH=N).  $^{13}\text{C}$  NMR

(150 MHz, CDCl<sub>3</sub>),  $\delta$ , ppm: 143.7, 143.6, 143.2, 140.9, 140.5, 139.3, 136.0, 135.8, 129.3, 127.7, 98.8, 97.4, 97.3, 29.7, 21.6, 21.4, 19.6, 19.5, 18.2, 18.1, 18.1, 16.9, 1.0.

**Ni (II) (E)-N'-(2,3,7,8,12,13,17,18-octaethylporphyrin-5-ylmethylene)-4-methylbenzenesulfonohydrazide 5c.**

<sup>1</sup>H NMR (600 MHz, CDCl<sub>3</sub>),  $\delta$ , ppm: 1.41 (3H, t,  $\beta$ -CH<sub>3</sub>), 1.72 (5H, t,  $\beta$ -CH<sub>3</sub>), 1.80 (16H, t,  $\beta$ -CH<sub>3</sub>), 2.28 (2H, s, CH<sub>3</sub>(Tosyl)), 3.44 (4H, q,  $\beta$ -CH<sub>2</sub>), 3.79 (4H, q,  $\beta$ -CH<sub>2</sub>), 3.85 (8H, q,  $\beta$ -CH<sub>2</sub>), 7.05 (2H, d, CH (Tosyl)), 7.60 (2H, d, CH(Tosyl)), 8.57 (1H, s, NH), 9.50 (2H, s, 10,20-CH), 9.50 (1H, s, 15-CH), 10.11 (1H, s, CH=N).

**Ni (II) N'-(2,3,7,8,12,13,17,18-octaethyl-17,18-trans-dihydroporphyrin-5-ylmethylene)-4-methylbenzenesulfonohydrazide 6c.** Z- and E- isomers (46 mg, 61%, ratio 3:2) of the tosylhydrazone **6c** were prepared as emerald solid from Ni (II) 5-formyl-2,3,7,8,12,13,17,18-octaethyl-17,18-trans-dihydroporphyrin **6b** (60 mg, 0.096 mmol).

Isomer 1: <sup>1</sup>H NMR (600 MHz, CDCl<sub>3</sub>),  $\delta$ , ppm: 0.69 (3H, t,  $J=7.3$  Hz, 18<sup>2</sup>-CH<sub>3</sub>), 0.97 (3H, t,  $J=7.3$  Hz, 17<sup>2</sup>-CH<sub>3</sub>), 0.95 (1H, m, 17<sup>1b</sup>CH<sub>2</sub>), 1.10 (1H, m, 17<sup>1a</sup>-CH<sub>2</sub>), 1.43 (3H, t,  $J=7.6$  Hz,  $\beta$ -CH<sub>3</sub>), 1.54 (3H, t,  $J=7.6$  Hz,  $\beta$ -CH<sub>3</sub>), 1.65 (12H, m,  $\beta$ -CH<sub>3</sub>), 1.77 (2H, m, 17<sup>1</sup>-CH<sub>2</sub>), 2.38 (2H, s, CH<sub>3</sub>(Tosyl)), 3.58 (12H, m,  $\beta$ -CH<sub>2</sub>), 3.86 (1H, m, 17-CH), 3.93 (1H, m, 18-CH), 6.78 (1H, br.s, NH), 7.17 (2H, m, CH(Tosyl)), 7.52 (2H, m, CH(Tosyl)), 7.93 (1H, s, 10-CH), 8.85 (1H, s, CH=N), 8.96 (1H, s, 20-CH), 9.01 (1H, s, 15-CH). <sup>13</sup>C NMR (150 MHz, CDCl<sub>3</sub>),  $\delta$ , ppm: 154.1, 152.4, 146.4, 145.4, 144.7, 143.9, 143.7, 140.6, 140.3, 139.2, 139.0, 137.9, 137.3, 136.9, 135.8, 135.4, 129.3, 127.7, 103.2, 101.5, 93.5, 93.2, 53.7, 53.6, 29.7, 27.8, 25.5, 21.5, 19.6, 19.3, 19.2, 19.2, 19.2, 19.0, 18.9, 18.2, 18.1, 18.0, 18.0, 17.9, 17.3, 17.3, 17.2, 11.4, 10.9. HRMS (ESI),  $m/z$  found: 789.3455; calc. C<sub>44</sub>H<sub>53</sub>N<sub>6</sub>NiO<sub>2</sub>: [M+H]<sup>+</sup>, 789.3461. UV-Vis (CH<sub>2</sub>Cl<sub>2</sub>):  $\lambda_{\max}$ , nm (log ( $\epsilon$  [L mol<sup>-1</sup> cm<sup>-1</sup>])) 406 (5.17), 501 (3.98), 634 (4.82).

Isomer 2: 0.7 (3H, t,  $J=7.4$  Hz, 18<sup>2</sup>-CH<sub>3</sub>), 1.02 (3H, t,  $J=7.4$  Hz, 17<sup>2</sup>-CH<sub>3</sub>), 1.2 (2H, m, 18<sup>1</sup>-CH<sub>2</sub>), 1.57 (9H, m,  $\beta$ -CH<sub>3</sub>), 1.65 (9H, m,  $\beta$ -CH<sub>3</sub>), 1.77 (2H, m, 17<sup>1</sup>-CH<sub>2</sub>), 2.37 (2H, s, CH<sub>3</sub>(Tosyl)), 3.16 (2H, m,  $\beta$ -CH<sub>2</sub>), 3.56 (10H, m,  $\beta$ -CH<sub>2</sub>), 3.92 (1H, t,  $J=7.0$  Hz, 17-CH), 4.37 (1H, dd,  $J=4.2$  Hz,  $J=9.0$  Hz, 18-CH), 7.27 (2H, m, CH(Tosyl)), 7.82 (2H, m, CH(Tosyl)), 7.95 (1H, s, 10-CH), 8.07 (1H, br. s., NH), 8.89 (2H, s, 20-CH + CH=N), 8.93 (1H, s, 15-CH). <sup>13</sup>C NMR (150 MHz, CDCl<sub>3</sub>),  $\delta$ , ppm: 138.4, 137.7, 137.6, 137.0, 135.6, 135.1, 129.7, 127.9, 103.0, 101.3, 99.2, 93.4, 29, 7, 27.5, 25.3, 21.2, 20.4, 19.1, 19.1, 19.0, 19.0, 18.8, 17.9, 17.8, 17.7, 17.7, 17.0, 15.9, 11.2, 10.8. HRMS (ESI),  $m/z$  found: 789.3452; calc. C<sub>44</sub>H<sub>53</sub>N<sub>6</sub>NiO<sub>2</sub>: [M+H]<sup>+</sup>, 789.3461. UV-Vis (CH<sub>2</sub>Cl<sub>2</sub>):  $\lambda_{\max}$ , nm (log ( $\epsilon$  [L mol<sup>-1</sup> cm<sup>-1</sup>])) 407 (5.13), 501 (3.94), 638 (4.7).

**Ni (II) (Z)-N'-(3,8,13,18-tetramethyl-2,7,12,17-tetra(2-(ethoxycarbonyl)ethyl)porphyrin-5-ylmethylene)-4-methylbenzenesulfonohydrazide 7c.**<sup>2</sup> The product (27 mg, 78%) was obtained as a dark red solid from Ni (II) 5-formyl-3,8,13,18-tetramethyl-2,7,12,17-tetra(2-(ethoxycarbonyl)ethyl)porphyrin **7b** (29 mg, 0.034 mmol).

<sup>1</sup>H NMR (600 MHz, CDCl<sub>3</sub>),  $\delta$ , ppm: 1.22 (9H, m, OCH<sub>2</sub>CH<sub>3</sub>), 1.46 (3H, t,  $J=7.18$  Hz, OCH<sub>2</sub>CH<sub>3</sub>), 2.28 (3H, s, CH<sub>3</sub>(Tosyl)), 3.03 (2H, m,  $\beta$ -CH<sub>2</sub>), 3.05 (3H, s,  $\beta$ -CH<sub>3</sub>), 3.12 (4H, q,  $J=7.79$  Hz,  $\beta$ -CH<sub>2</sub>), 3.35 (3H, s,  $\beta$ -CH<sub>3</sub>), 3.45 (6H, s,  $\beta$ -CH<sub>3</sub>), 3.69 (2H, m,  $\beta$ -CH<sub>2</sub>), 4.13 (2H, m,  $\beta$ -CH<sub>2</sub>), 4.19 (10H, m,  $\beta$ -CH<sub>2</sub>, OCH<sub>2</sub>CH<sub>3</sub>), 4.40 (2H, q,  $J=7.18$  Hz, OCH<sub>2</sub>CH<sub>3</sub>), 7.01 (2H, m, CH(Tosyl)), 7.58 (2H, m, CH(Tosyl)), 9.51 (1H, s, NH), 9.57 (1H, s, 15-CH), 9.59 (1H, s, 20-CH), 9.61 (1H, s, 10-CH), 10.23 (1H, s, CH=N). <sup>13</sup>C NMR (150 MHz, CDCl<sub>3</sub>),  $\delta$ , ppm: 174.6, 173.0, 173.0, 150.7, 143.7, 141.9, 141.5, 141.4, 140.6, 140.5, 129.2, 128.0, 106.4, 97.4, 97.3, 97.2, 61.6, 60.7, 58.5, 36.9, 35.0, 31.9, 29.7, 29.4, 24.7, 22.7, 17.4, 14.3, 14.1, 11.6, 11.5, 11.5, 1.0.

**Ni (II) N'-(3,7,13,17-tetramethyl-2,8,12,18-tetra(2-(methoxycarbonyl)ethyl)porphyrin-5-ylmethylene)-4-methylbenzenesulfonohydrazide 8c.** The product (29 mg, 75%) was obtained as red powder from Ni (II) 5-formyl-3,7,13,17-tetramethyl-2,8,12,18-tetra(2-(methoxycarbonyl)ethyl)porphyrin **8b** (32 mg, 0.047 mmol).

Isomer 1: <sup>1</sup>H NMR (600 MHz, CDCl<sub>3</sub>),  $\delta$ , ppm: 10.36 (1H, s, CH=N), 9.66 (1H, s, 5-CH), 9.63 (1H, s, 20-CH), 9.53 (1H, s, 15-CH), 9.52 (1H, s, NH), 7.51 (2H, m, CH (Tosyl)), 7.01 (2H, m, CH (Tosyl)), 4.22 (14H, m,  $\beta$ -CH<sub>2</sub>), 3.89 (6H, s,  $\beta$ -CH<sub>3</sub>), 3.75 (3H, s, OCH<sub>3</sub>), 3.69 (3H, s, OCH<sub>3</sub>), 3.45 (6H, s,  $\beta$ -CH<sub>3</sub>), 3.37 (3H, s,  $\beta$ -CH<sub>3</sub>), 3.18 (4H, m, CH<sub>2</sub>), 2.72 (4H, m,  $\beta$ -CH<sub>2</sub>), 2.28 (3H, s, CH<sub>3</sub>(Tosyl)). <sup>13</sup>C NMR (150 MHz, CDCl<sub>3</sub>),  $\delta$ , ppm: 174.2, 173.2, 150.3, 144.1, 141.1, 140.7, 140.6, 140.2, 140.1, 139.8, 139.2, 138.2, 135.5, 129.2, 127.7, 97.7, 97.0, 52.0, 51.5, 36.5, 34.4, 24, 3, 21.5, 21.1, 11.2, 11.2. HRMS (ESI),  $m/z$  found: 963.2878; calc. C<sub>48</sub>H<sub>53</sub>N<sub>6</sub>NiO<sub>10</sub>S: [M+H]<sup>+</sup>, 963.2897. UV-Vis (CH<sub>2</sub>Cl<sub>2</sub>):  $\lambda_{\max}$ , nm (log ( $\epsilon$  [L mol<sup>-1</sup> cm<sup>-1</sup>])) 410 (4.8), 531 (3.47), 572 (3.84), 646 (3.09).

Isomer 2: <sup>1</sup>H NMR (600 MHz, CDCl<sub>3</sub>),  $\delta$ , ppm: 9.68 (1H, s, CH=N), 9.54 (3H, s, 5-CH, 20-CH, 15-CH), 8.92 (1H, s, NH), 7.68 (2H, m, CH (Tosyl)), 7.22 (2H, m, CH (Tosyl)), 4.15 (4H, m,  $\beta$ -CH<sub>2</sub>), 3.98 (4H, m,  $\beta$ -CH<sub>2</sub>), 3.70 (6H, s, OCH<sub>3</sub>), 3.69 (6H, s, OCH<sub>3</sub>), 3.38 (6H, s,  $\beta$ -CH<sub>3</sub>), 3.14 (4H, m,  $\beta$ -CH<sub>2</sub>), 2.96 (4H, m,  $\beta$ -CH<sub>2</sub>), 2.68 (6H, s,  $\beta$ -CH<sub>3</sub>), 2.41 (3H, s, CH<sub>3</sub> (Tosyl)). <sup>13</sup>C NMR (150 MHz, CDCl<sub>3</sub>),  $\delta$ , ppm: 173.2, 173.1, 150.4, 144.6, 141.7, 141.4, 140.3, 140.0, 139.9, 139.4, 138.3, 137.6, 135.8, 129.7, 127.8, 97.1, 51.5, 36.5, 36.4, 29.7, 21.5, 21.3, 21.2, 16.6, 11.2. HRMS (ESI),  $m/z$  found: 963.2883; calc. C<sub>48</sub>H<sub>53</sub>N<sub>6</sub>NiO<sub>10</sub>S: [M+H]<sup>+</sup>, 963.2897. UV-Vis (CH<sub>2</sub>Cl<sub>2</sub>):  $\lambda_{\max}$ , nm (log ( $\epsilon$  [L mol<sup>-1</sup> cm<sup>-1</sup>])) 409 (5.22), 534 (3.98), 569 (4.29), 637 (3.83).

**General cyclopropanation procedure on the example of the N-tosylhydrazone of methyl pyropheophorbide-d 3.**

To a solution of tosylhydrazone **3** (50 mg, 0.070 mmol) in 1,4-dioxane (1 ml) styrene (2.0 ml, 17 mmol) and potassium carbonate (110 mg, 0.80 mmol) were added. The reaction mixture was refluxed for 1 hour, then the solvent was evaporated *in vacuo*. The resulting product was purified by column chromatography on silica gel (CH<sub>2</sub>Cl<sub>2</sub>:Et<sub>2</sub>O = 90:1) yielding the mixture (36 mg, 71%) of two diastereomers of the cyclopropanated product **9** as a black powder. The mixture of diastereomers was separated using the RF-HPLC in a linear gradient from 85% to 100% (v/v) MeCN (Biosolve, HPLC-S gradient grade) in water affording two diastereomers of the cyclopropane conjugates with methyl pyropheophorbide-d **9a** (18 mg, 35 %) and **9b** (18 mg, 35 %).

**Product 9a.** <sup>1</sup>H NMR (600 MHz, CDCl<sub>3</sub>),  $\delta$ , ppm: 9.51 (1H, s, 10-H), 9.43 (1H, ds, 5-H), 8.50 (1H, s, 20-H), 7.58 (4H, m, Ph), 7.42 (1H, m, Ph), 5.27 (1H, d,  $J = 19.2$  Hz, 13<sup>2</sup>-H<sup>a</sup>), 5.12 (1H, d,  $J = 19.2$  Hz, 13<sup>2</sup>-H<sup>b</sup>), 4.49 (1H, m, 18-H), 4.30 (1H,

m, 17-H), 3.70 (2H, m, 8<sup>1</sup>-CH<sub>2</sub>), 3.69 (3H, s, 12-CH<sub>3</sub>), 3.63 (3H, ds, 17<sup>2</sup>-CO<sub>2</sub>CH<sub>3</sub>), 3.42 (3H, s, 2-CH<sub>3</sub>), 3.13 (1H, m, cyclopropane), 3.42 (3H, s, 7-CH<sub>3</sub>), 2.76 (1H, m, cyclopropane), 2.71 (1H, m, 17<sup>1</sup>-H<sup>a</sup>), 2.57 (1H, m, 17<sup>2</sup>-H<sup>a</sup>), 2.33 (2H, m, 17<sup>1</sup>-H<sup>b</sup>, 17<sup>2</sup>-H<sup>b</sup>), 2.07 (2H, m, cyclopropane), 1.83 (3H, d, J = 7.5 Hz, 18-CH<sub>3</sub>), 1.70 (3H, t, J = 7.8 Hz, 8<sup>2</sup>-CH<sub>3</sub>), 0.10 (1H, s, NH), -1.62 (1H, s, NH). <sup>13</sup>C NMR (150 MHz, CDCl<sub>3</sub>), δ, ppm: 196.2, 173.5, 171.7, 167.7, 159.9, 155.3, 150.7, 149.1, 145.0, 142.5, 142.0, 138.8, 138, 1, 137.7, 136.0, 133, 133.5, 130.9, 130.4, 128.9, 128.8, 128.0, 126.3, 126.0, 106.0, 104, 2, 97.3, 92.6, 68.2, 51.7, 51.6, 50.0, 48.0, 38.8, 30.9, 30.4, 29.9, 29.7, 28.9, 25.4, 25.3, 23.8, 23.1, 23.0, 20.3, 19.5, 17.4, 17.0, 17.0, 14.0, 12, 0, 11.6, 11.0, 10.6. HRMS (ESI), *m/z* found: 639.3351; calc. C<sub>41</sub>H<sub>43</sub>N<sub>4</sub>O<sub>3</sub>: [M+H]<sup>+</sup>, 639.3335. UV-Vis (CH<sub>2</sub>Cl<sub>2</sub>): λ<sub>max</sub>, nm (log (ε [L mol<sup>-1</sup> cm<sup>-1</sup>])) 410 (4.93), 505 (3.9), 536 (3.86), 605 (3.84), 660 (4.58).

**Product 9b.** <sup>1</sup>H NMR (600 MHz, CDCl<sub>3</sub>), δ, ppm: 9.48 (1H, ds, 10-H), 9.44 (1H, ds, 5-H), 8.35 (1H, ds, 20-H), 6.87 (2H, m, Ph), 6.74 (3H, m, Ph), 5.25 (1H, dd, J = 19.2 Hz, 13<sup>2</sup>-H<sup>a</sup>), 5.10 (1H, dd, J = 19.2 Hz, 13<sup>2</sup>-H<sup>b</sup>), 4.43 (1H, m, 18-H), 4.27 (1H, m, 17-H), 3.71 (2H, m, 8<sup>1</sup>-CH<sub>2</sub>), 3.69 (3H, ds, 12-CH<sub>3</sub>), 3.63 (3H, ds, 17<sup>2</sup>-CO<sub>2</sub>CH<sub>3</sub>), 3.36 (1H, m, cyclopropane), 3.24 (3H, ds, 2-CH<sub>3</sub>), 3.08 (3H, ds, 7-CH<sub>3</sub>), 3.06 (1H, m, cyclopropane), 2.70 (1H, m, 17<sup>1</sup>-H<sup>a</sup>), 2.55 (1H, m, 17<sup>2</sup>-H<sup>a</sup>), 2.33 (2H, m, 17<sup>1</sup>-H<sup>b</sup>, 17<sup>2</sup>-H<sup>b</sup>), 2.21 (2H, m, cyclopropane), 1.79 (3H, m, 18-CH<sub>3</sub>), 1.71 (3H, t, 8<sup>2</sup>-CH<sub>3</sub>), 0.10 (1H, s, NH), -1.7 (1H, s, NH). <sup>13</sup>C NMR (150 MHz, CDCl<sub>3</sub>), δ, ppm: 196.2, 173.5, 171.5, 160.0, 159.9, 155.2, 150.6, 149.0, 144.9, 141.9, 141.8, 139.4, 138, 2, 137.6, 135.9, 135.7, 134.9, 134.8, 130.3, 127.9, 127.5, 126.8, 125.4, 105.8, 104.0, 97, 6, 97.6, 92.4, 92.4, 51.6, 50.0, 48.0, 45.4, 37.1, 34.3, 31.9, 31.4, 31.0, 31.0, 30.3, 30.2, 30.1, 29.9, 29.7, 29.2, 27.7, 27.4, 23.0, 22.7, 22.4, 22, 3, 21.5, 20.6, 19.7, 19.6, 19.5, 18.1, 17.4, 14.5, 14.1, 12.0, 11.5, 11.2. HRMS (ESI), *m/z* found: 639.3348; calc. C<sub>41</sub>H<sub>43</sub>N<sub>4</sub>O<sub>3</sub>: [M+H]<sup>+</sup>, 639.3335. UV-Vis (CH<sub>2</sub>Cl<sub>2</sub>): λ<sub>max</sub>, nm (log (ε [L mol<sup>-1</sup> cm<sup>-1</sup>])) 410 (4.56), 513 (3.48), 537 (3.19), 614 (3.49), 661 (4.22).

**Product 10.** The product (14 mg, 80%) was obtained as green black solid from N-tosylhydrazone of methyl pyropheophorbide-*a* 4 (20 mg, 0.028 mmol).

<sup>1</sup>H NMR (600 MHz, CDCl<sub>3</sub>), δ, ppm: 9.98-9.94 (1H, m, 10-H), 9.6-9.575, 9.405-9.38 (1H, m, 5-H), 9.01-8.97, 8.96-8.93 (1H, s, 20-H), 8.35-8.26 (1H, m, 3<sup>1</sup>-H), 7.52-7.2 (5H, m, C<sub>6</sub>H<sub>5</sub>), 6.42-6.35 (1H, m, 3<sup>2a</sup>-H), 6.21-6.16 (1H, m, 3<sup>2b</sup>-H), 5.2-4.28 (4H, m, 13<sup>2</sup>-H<sup>a</sup> + 13<sup>2</sup>-H<sup>b</sup> + 18-H + 17-H), 3.94-3.78 (2H, m, 8<sup>1</sup>-CH<sub>2</sub>), 3.68-3.44 (13H, m, 12-CH<sub>3</sub> + 17<sup>2</sup>-CO<sub>2</sub>CH<sub>3</sub> + 2-CH<sub>3</sub> + 7-CH<sub>3</sub> + CH(cyclopropane)), 2.85-2.06 (6H, m, 17<sup>1</sup>-H<sup>a</sup> + 17<sup>1</sup>-H<sup>b</sup> + 17<sup>2</sup>-H<sup>b</sup> + 17<sup>2</sup>-H<sup>a</sup> + CH<sub>2</sub>(cyclopropane)), 1.98-1.72 (6H, m, 8<sup>2</sup>-CH<sub>3</sub> + 18-CH<sub>3</sub>). <sup>13</sup>C NMR (150 MHz, CDCl<sub>3</sub>), δ, ppm: 174.02, 173.9, 173.85, 173.55, 165.24, 165.2, 165.07, 162.6, 162.5, 162.32, 151.04, 150.9, 149.47, 149.44, 149.38, 146.2, 146.18, 144.9, 143.8, 143.76, 142.76, 142.64, 142.57, 142.56, 142.5, 142.22, 142.2, 139.47, 139.3, 136.8, 136.77, 136.7, 136.35, 133.45, 133.37, 131.35, 131.22, 131.15, 131.07, 130.34, 128.55, 128.53, 128.49, 128.44, 128.41, 127.76, 126.8, 126.39, 126.33, 121.23, 121.19, 120.84, 120.76, 111.17, 98.51, 97.21, 93.32, 53.54, 53.29, 53.06, 51.54, 51.47, 51.39, 49.16, 49.03, 42.1, 41.9, 32.75, 32.14, 31.92, 31.86, 31.66, 30.82, 30.54, 29.72, 29.39, 29.09, 28.93, 24.15, 24.06, 24.0, 23.9, 20.06, 20.0, 19.8, 19.7, 17.7, 17.6, 12.35, 11.52, 10.55, 10.09, 10.04. HRMS (ESI), *m/z* found: 637.3564; calc. C<sub>42</sub>H<sub>45</sub>N<sub>4</sub>O<sub>2</sub>: [M+H]<sup>+</sup>, 637.3543. UV-Vis (CH<sub>2</sub>Cl<sub>2</sub>): λ<sub>max</sub>, nm (log (ε [L mol<sup>-1</sup> cm<sup>-1</sup>])) 413 (4.9), 505 (3.91), 537 (3.19), 599 (3.41), 654 (4.37).

#### General procedure of the thermal decomposition of tosylhydrazones of the tetrapyrroles on the example of the N-tosylhydrazone of methyl pyropheophorbide-*d* 3.

To a solution of tosylhydrazone **3** (50 mg, 0.070 mmol) in 1,4-dioxane (3 ml) potassium carbonate (110 mg, 0.80 mmol) was added. The reaction mixture was refluxed for 4 hours, then the solvent was evaporated *in vacuo*. The resulting product was purified by column chromatography on silica gel (CH<sub>2</sub>Cl<sub>2</sub>:Et<sub>2</sub>O = 90:1) yielding the mixture (25 mg, 58%) of two diastereomers of the conjugate of the methyl pyropheophorbide-*d* with 1,4-dioxane **11** as a black powder.

<sup>1</sup>H NMR (600 MHz, CDCl<sub>3</sub>), δ, ppm: 9.66 (1H, s, 5-H (isomer 2)), 9.515 (1H, s, 10-H (isomer 2)), 9.51 (1H, s, 10-H (isomer 1)), 9.25 (1H, s, 5-H (isomer 1)), 8.55 (1H, s, 20-H (isomer 2)), 8.52 (1H, s, 20-H (isomer 1)), 6.22 (1H, m, 3<sup>2</sup>-H (isomer 2)), 5.28 (2H, m, 13<sup>2</sup>-H<sup>a</sup> (isomer 1 + isomer 2)), 5.13 (2H, m, 13<sup>2</sup>-H<sup>b</sup> (isomer 1 + isomer 2)), 4.49 (6H, m, 18-H (isomer 1 + isomer 2) + 3<sup>4</sup>-CH<sub>2</sub> (isomer 1 + isomer 2)), 4.37 (1H, m, 3<sup>2</sup>-H (isomer 1)), 4.3 (6H, m, 17-H (isomer 1 + isomer 2) + 3<sup>5</sup>-CH<sub>2</sub> (isomer 1 + isomer 2)), 3.93 (3H, m, 3<sup>7</sup>-CH<sub>2</sub> (isomer 2) + 1H, m, 3<sup>1a</sup>-CH<sub>2</sub> (isomer 2)), 3.82 (1H, m, 3<sup>1b</sup>-CH<sub>2</sub> (isomer 2)), 3.74 (2H, m, 3<sup>1</sup>-CH<sub>2</sub>, (isomer 1)), 3.72 (4H, m, 8<sup>1</sup>-CH<sub>2</sub> (isomer 1 + isomer 2)), 3.68 (6H, s, 12-CH<sub>3</sub> (isomer 1 + isomer 2)), 3.64 (6H, s, 17<sup>2</sup>-CO<sub>2</sub>CH<sub>3</sub> (isomer 1 + isomer 2)), 3.45 (3H, s, 2-CH<sub>3</sub> (isomer 2)), 3.34 (3H, s, 2-CH<sub>3</sub> (isomer 1)), 3.30 (3H, s, 7-CH<sub>3</sub> (isomer 2)), 3.28 (3H, s, 7-CH<sub>3</sub> (isomer 1)), 2.95 (1H, m, 3<sup>7a</sup>-CH<sub>2</sub> (isomer 2)), 2.72 (3H, m, 17<sup>1</sup>-H<sup>a</sup> (isomer 1 + isomer 2) + 3<sup>7b</sup>-CH<sub>2</sub> (isomer 2)), 2.58 (1H, m, 17<sup>2</sup>-H<sup>a</sup> (isomer 1 + isomer 2)), 2.32 (4H, m, 17<sup>1</sup>-H<sup>b</sup> + 17<sup>2</sup>-H<sup>b</sup> (isomer 1 + isomer 2)), 1.84 (6H, d, J = 7.5 Hz, 18-CH<sub>3</sub> (isomer 1 + isomer 2)), 1.73 (6H, t, J = 7.8 Hz, 8<sup>2</sup>-CH<sub>3</sub> (isomer 1 + isomer 2)), 0.10 (1H, s, NH), -1.64 (1H, s, NH). <sup>13</sup>C NMR (150 MHz, CDCl<sub>3</sub>), δ, ppm: 196.2, 173.5, 171.6, 171.4, 160.3, 160.2, 155.0, 150.8, 150.6, 149.1, 145.1, 145.0, 141, 7, 141.4, 139.7, 137.8, 137.7, 137.2, 136.1, 135.9, 135.1, 134.6, 133.3, 131.1, 131.0, 130.4, 128.3, 128.3, 106.1, 104.2, 104.1, 98.1, 98.0, 96.5, 96.5, 92.8, 92.8, 73, 5, 73.4, 73.3, 71.3, 68.9, 67.1, 66.5, 51.7, 50.1, 48.0, 41.0, 30.9, 29.9, 28.8, 23.1, 23.1, 19.5, 17.4, 12.0, 11.7, 11.5, 11.3, 11.3. HRMS (ESI), *m/z* found: 623.3218; calc. C<sub>37</sub>H<sub>43</sub>N<sub>4</sub>O<sub>5</sub>: [M+H]<sup>+</sup> 623.3233. UV-Vis (CH<sub>2</sub>Cl<sub>2</sub>): λ<sub>max</sub>, nm (log (ε [L mol<sup>-1</sup> cm<sup>-1</sup>])) 409 (5.17), 506 (4.19), 537 (4.15), 608 (4.04), 665 (4.82).

**Ni(II) 3,5-(1-methylethylene)-2,7,8,12,13,17,18-heptaethylporphyrin 12.** The product (17 mg, 75%) was obtained as a black solid from Ni (II) N<sup>1</sup>-(2,3,7,8,12,13,17,18-octaethylporphyrin-5-ylmethylene)-4-methylbenzenesulfonohydrazide **5c** (30 mg, 0.038 mmol).

<sup>1</sup>H NMR (600 MHz, CDCl<sub>3</sub>), δ, ppm: 9.86 (1H, s, *meso*-H), 9.85 (1H, s, *meso*-H), 9.83 (1H, s, *meso*-H), 5.54 (1H, dd, J = 6.64, J = 15.78 Hz, 3<sup>1a</sup>-CH<sub>2</sub>), 4.79 (1H, dd, J = 2.26 Hz, J = 15.78, 3<sup>1b</sup>-CH<sub>2</sub>), 4.57 (1H, m, 4<sup>1</sup>-CH), 3.99 (16H, m, CH<sub>2</sub>-CH<sub>3</sub>), 2.0 (3H, d, J = 7.28 Hz, 3<sup>2</sup>-CH<sub>3</sub>), 1.94 (3H, t, J = 7.74 Hz, CH<sub>2</sub>-CH<sub>3</sub>), 1.89 (15H, m, CH<sub>2</sub>-CH<sub>3</sub>), 1.76 (3H, t, J = 7.74 Hz, CH<sub>2</sub>-CH<sub>3</sub>). <sup>13</sup>C NMR (150 MHz, CDCl<sub>3</sub>), δ, ppm: 152.8, 148.60, 145.30, 143.70, 142.60, 142.50, 142.40, 141.90, 141.60, 141.50, 141.20, 141.00, 141.05, 140.60, 140.40, 140.30, 138.80, 134.70, 117.40, 97.30, 97.41, 96.0, 46.90, 33.10, 29.70,

21.90, 20.80, 20.40, 19.80, 19.85, 19.70, 19.75, 18.70, 18.30, 18.35, 17.40, 17.20. HRMS (ESI),  $m/z$  found: 603.3016; calc.  $C_{37}H_{45}N_4Ni$ :  $[M+H]^+$ , 603.2998. UV-Vis ( $CH_2Cl_2$ ):  $\lambda_{max}$ , nm (log ( $\epsilon$  [ $L mol^{-1} cm^{-1}$ ])) 393 (5.2), 514 (4.1), 551 (4.3).

**Ni(II) 3,5-(1-methylethylene)-2,7,8,12,13,17,18-heptaethyl-17,18-trans-dihydroporphyrin 13.** The product (14 mg, 59%) was obtained as a blue amorphous solid from Ni (II)  $N'$ -(2,3,7,8,12,13,17,18-octaethyl-17,18-trans-dihydroporphyrin-5-ylmethylene)-4-methylbenzenesulfonohydrazide **6c** (31 mg, 0.035 mmol). The product **13** contained two diastereomers in a ratio of 8:1.

$^1H$  NMR (600 MHz,  $CDCl_3$ ),  $\delta$ , ppm: 9.305 (2H, br.s, *meso*-H (isomer 2)), 9.302 (1H, s, *meso*-H (isomer 1)), 9.30 (1H, s, *meso*-H (isomer 1)), 8.36 (1H, s, *meso*-H (isomer 2)), 8.34 (1H, s, *meso*-H (isomer 1)), 4.77 (1H, dd,  $J = 7.20$ ,  $J = 15.0$   $3^{1a}$ - $CH_2$  (isomer 1)), 4.59 (1H, dd,  $J_1 = 7.17$  Hz,  $J_2 = 15.0$  Hz,  $3^{1a}$ - $CH_2$  (isomer 2)), 4.37 (1H, dd,  $J_1 = 7.17$  Hz,  $J_2 = 15.0$  Hz,  $3^2$ -CH (isomer 1)), 4.28 (3H, m, 8-CH (isomer 1 + isomer 2) +  $3^2$ -CH (isomer 1)), 4.07 (2H, m, 7-CH (isomer 1 + isomer 2)), 4.03 (1H, dd,  $J_1 = 2.46$  Hz,  $J_2 = 15.0$  Hz,  $3^{1b}$ - $CH_2$  (isomer 2)), 4.77 (1H, m,  $3^{1b}$ - $CH_2$  (isomer 1)), 3.76 (20H, m,  $CH_2$ - $CH_3$  (isomer 1 + isomer 2)), 2.04 (2H, m,  $7^{1a}$ - $CH_2$ - $CH_3$  (isomer 1 + isomer 2)), 1.97 (2H, m,  $8^{1a}$ - $CH_2$ - $CH_3$  (isomer 1 + isomer 2)), 1.91 (3H, d,  $J = 7.3$  Hz,  $3^1$ -CH- $CH_3$  (isomer 1)), 1.89 (2H, m,  $8^{1b}$ - $CH_2$ - $CH_3$  (isomer 1 + isomer 2)), 1.87 (2H, m,  $7^{1b}$ - $CH_2$ - $CH_3$  (isomer 1 + isomer 2)), 1.83 (9H, m,  $3^1$ -CH- $CH_3$  (isomer 2) +  $CH_2$ - $CH_3$  (isomer 1 + isomer 2)), 1.73 (24H, m,  $CH_2$ - $CH_3$  (isomer 1 + isomer 2)), 1.07 (6H, m,  $7^2$ - $CH_3$  (isomer 1 + isomer 2)), 1.01 (6H, m,  $8^2$ - $CH_3$  (isomer 1 + isomer 2)).  $^{13}C$  NMR (150 MHz,  $CDCl_3$ ),  $\delta$ , ppm: 139.4, 138.6, 137.8, 136.6, 100.4, 99.8, 93.1, 54.3, 50.2, 44.3, 44.2, 33.1, 32, 0, 30.2, 30.0, 29.8, 29.7, 29.4, 27.2, 22.7, 21.9, 21.8, 20.3, 19.5, 19.3, 18.3, 18.2, 17.7, 17.0, 16.9, 14.2, 11.0, 10.9, 10.8. HRMS (ESI),  $m/z$  found: 605.31671; calc.  $C_{37}H_{47}N_4Ni$ :  $[M+H]^+$ , 605.3154. UV-Vis ( $CH_2Cl_2$ ):  $\lambda_{max}$ , nm (log ( $\epsilon$  [ $L mol^{-1} cm^{-1}$ ])) 399 (5.17), 490 (3.82), 610 (4.74).

Thermal decomposition of Ni (II)  $N'$ -(3,8,13,18-tetramethyl-2,7,12,17-tetra(2-(ethoxycarbonyl)ethyl)porphyrin-5-ylmethylene)-4-methylbenzenesulfonohydrazide **7c** (42 mg, 0.041 mmol) gave three products **14-16** with the total yield 76%.

**Ni(II) 5,7-(2-((ethoxycarbonyl)methyl)ethylene)-3,8,13,18-tetramethyl-2,12,17-tri(2-(ethoxycarbonyl)ethyl)porphyrin 14.** The product (15 mg, 44%) was obtained as red powder.

$^1H$  NMR (600 MHz,  $CDCl_3$ ),  $\delta$ , ppm: 9.73 (1H, s, *meso*-H), 9.70 (1H, s, *meso*-H), 9.68 (1H, s, *meso*-H), 5.30 (1H, dd,  $J_1 = 7.2$  Hz,  $J_2 = 16.6$  Hz,  $3^{1a}$ - $CH_2$ ), 4.72 (2H, m,  $5^{1b}$ - $CH_2$  +  $5^2$ -CH), 4.36 (2H, q,  $J = 7.2$  Hz,  $5^2$ - $CH_2COOCH_2CH_3$ ), 4.21 (12H, m,  $-OCH_2CH_3$  +  $CH_2$ ), 3.51 (3H, s,  $CH_3$ ), 3.50 (3H, s,  $CH_3$ ), 3.46 (1H, m,  $5^{2a}$ - $CH_2COOCH_2CH_3$ ), 3.45 (3H, s,  $CH_3$ ), 3.32 (3H, s,  $CH_3$ ), 3.17 (4H, m,  $CH_2$ ), 3.10 (2H, t,  $J = 7.9$  Hz,  $CH_2$ ), 2.96 (1H, m,  $5^{2b}$ - $CH_2COOCH_2CH_3$ ), 1.35 (3H, t,  $J = 7.2$  Hz,  $CHCOOCH_2CH_3$ ), 1.22 (9H, m,  $OCH_2CH_3$ ).  $^{13}C$  NMR (150 MHz,  $CDCl_3$ ),  $\delta$ , ppm: 173.2, 173.1, 150.1, 148.2, 146.2, 142.1, 141.3, 141.3, 140.9, 140.6, 140.1, 139.3, 138, 8, 137.6, 136.5, 135.6, 128.5, 117.3, 97.3, 97.2, 96.1, 60.6, 45.4, 40.3, 37.4, 37.2, 37.2, 34.8, 29.7, 21.8, 21.8, 21.6, 14.2, 12.0, 11.7, 11.7. HRMS (ESI),  $m/z$  found: 835.3242; calc.  $C_{45}H_{53}N_4NiO_8$ :  $[M+H]^+$ , 835.3217. UV-Vis ( $CH_2Cl_2$ ):  $\lambda_{max}$ , nm (log ( $\epsilon$  [ $L mol^{-1} cm^{-1}$ ])) 403 (5.36), 514 (4.11), 552 (4.39).

**Ni(II) 5,7-(2-(ethoxycarbonyl)-1,3-propylene)-3,8,13,18-tetramethyl-2,12,17-tri(2-(ethoxycarbonyl)ethyl)porphyrin 15.** The product (11 mg, 32%) was obtained as red powder.  $^1H$  NMR (600 MHz,  $CDCl_3$ ),  $\delta$ , ppm: 9.66 (1H, s, *meso*-H), 9.62 (1H, s, *meso*-H), 9.60 (1H, s, *meso*-H), 4.95 (2H, m,  $5^1$ - $CH_2$ ), 4.35 (2H, q,  $J = 7.1$  Hz,  $5^2$ - $CH_2COOCH_2CH_3$ ), 4.20 (12H, m,  $-OCH_2CH_3$  +  $CH_2$ ), 4.08 (1H, m,  $5^{3a}$ - $CH_2$ ), 3.95 (1H, m,  $5^{3b}$ - $CH_2$ ), 3.49 (3H, s,  $CH_3$ ), 3.47 (6H, s,  $CH_3$ ), 3.43 (3H, s,  $CH_3$ ), 3.36 (1H, m,  $5^2$ -CH), 3.14 (6H, m,  $CH_2$ ), 1.39 (3H, t,  $J = 7.1$  Hz,  $CHCOOCH_2CH_3$ ), 1.22 (9H, m,  $OCH_2CH_3$ ).  $^{13}C$  NMR (150 MHz,  $CDCl_3$ ),  $\delta$ , ppm: 174.8, 173.1, 141.9, 141.4, 141.2, 141.0, 140.7, 140.3, 139.8, 139.6, 139.1, 138.8, 137.6, 137.4, 136.9, 133.9, 111.7, 97.1, 96.5, 95.8, 60.9, 60.6, 43.2, 37.2, 37.0, 33, 9, 30.9, 29.7, 27.7, 21.7, 21.6, 16.8, 14.3, 14.2, 11.6, 11.6. HRMS (ESI),  $m/z$  found: 835.3238; calc.  $C_{45}H_{53}N_4NiO_8$ :  $[M+H]^+$ , 835.3217. UV-Vis ( $CH_2Cl_2$ ):  $\lambda_{max}$ , nm (log ( $\epsilon$  [ $L mol^{-1} cm^{-1}$ ])) 407 (5.09), 520 (3.86), 555 (4.11).

**Ni(II) 3,5-ethylene-8,13,18-trimethyl-2,7,12,17-tetra(2-(ethoxycarbonyl)ethyl)porphyrin 16.**<sup>3</sup> The product was obtained in traces.

**Ni(II) 3,5-ethylene-7,13,17-trimethyl-2,8,12,18-tetra(2-(methoxycarbonyl)ethyl)porphyrin 17.**<sup>3</sup> The product (17 mg, 72%) was obtained as dark red powder from Ni (II)  $N'$ -(3,7,13,17-tetramethyl-2,8,12,18-tetra(2-(methoxycarbonyl)ethyl)porphyrin-5-ylmethylene)-4-methylbenzenesulfonohydrazide **8c** (29 mg, 0.03 mmol).

$^1H$  NMR (600 MHz,  $CDCl_3$ ),  $\delta$ , ppm: 9.70 (1H, s, *meso*-H), 9.63 (1H, s, *meso*-H), 9.53 (1H, s, *meso*-H), 4.74 (2H, m,  $5^1$ - $CH_2$ ), 4.21 (4H, m,  $CH_2CH_2CO$ ), 4.13 (2H, t,  $J = 7.7$  Hz,  $CH_2CH_2CO$ ), 4.07 (2H, t,  $J = 7.7$  Hz,  $CH_2CH_2CO$ ), 3.78 (3H, s,  $CH_3$ ), 3.72 (3H, s,  $CH_3$ ), 3.71 (3H, s,  $CH_3$ ), 3.70 (3H, s,  $OCH_3$ ), 3.65 (2H, m,  $3^1$ - $CH_2$ ), 3.485 (3H, s,  $OCH_3$ ), 3.48 (3H, s,  $OCH_3$ ), 3.22 (3H, s,  $OCH_3$ ), 3.17 (6H, m,  $CH_2CH_2CO$ ), 3.11 (2H, t,  $J = 7.7$  Hz,  $CH_2CH_2CO$ ).

### X-ray diffraction study

Single-crystal X-ray data of the red needle crystal of **9a** were collected by using STOE diffractometer Pilatus100K detector, focusing mirror collimation  $\text{CuK}\alpha$  (1.54086 Å) radiation, rotation method mode. STOE X-Area software was used for cells refinement and data reduction. Data collection and image processing was performed with X-Area 1.67 (STOE & Cie GmbH, Darmstadt, Germany, 2013). Intensity data were scaled with LANA (part of X-Area) in order to minimize differences of intensities of symmetry-equivalent reflections (multi-scan method). All hydrogen atoms were placed in the calculated positions and allowed to ride on their parent atoms [C-H 0.93-0.98; Uiso (H) = 1.2 Ueq(parent atom)]. The crystal structure was solved and refined with SHELX<sup>[22]</sup> program. The non-hydrogen atoms were refined by using the anisotropic full matrix least-square procedure. Refinement was made against 4491 reflections, 401 parameters were refined using 84 restraints. The final R 0.1407 against  $I > 2\sigma(I)$ ,  $R_w = 0.3023$ . Molecular geometry calculations were performed with the SHELX program, and the molecular graphics were prepared by using DIAMOND<sup>[23]</sup> software. Crystal data and structure refinement parameters are in the table S1. Structure parameters are in the tables S2-S4. The plot of the molecular structure of the **9a** is in the Figure S1. CCDC-2092020 contain the supplementary crystallographic data for this paper. These data can be obtained free of charge from The Cambridge Crystallographic Data Centre via [www.ccdc.cam.ac.uk/data\\_request/cif](http://www.ccdc.cam.ac.uk/data_request/cif).

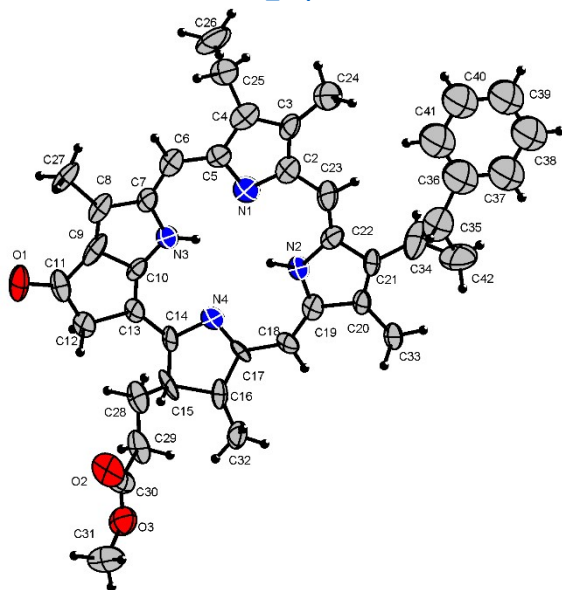

Figure S1. The thermal ellipsoid plot of **9a**. Displacement ellipsoids are drawn at 50% probability level at 295 K.

Table S1. Crystal data and structure refinement for **9a**.

|                                   |                                             |                       |
|-----------------------------------|---------------------------------------------|-----------------------|
| Identification code               | shelx                                       |                       |
| Empirical formula                 | C41 H42 N4 O3                               |                       |
| Formula weight                    | 638.78                                      |                       |
| Temperature                       | 293(2) K                                    |                       |
| Wavelength                        | 1.54186 Å                                   |                       |
| Crystal system                    | Orthorhombic                                |                       |
| Space group                       | P 21 21 21                                  |                       |
| Unit cell dimensions              | a = 5.5160(10) Å                            | $\alpha = 90^\circ$ . |
|                                   | b = 19.977(3) Å                             | $\beta = 90^\circ$ .  |
|                                   | c = 30.800(10) Å                            | $\gamma = 90^\circ$ . |
| Volume                            | 3393.9(14) Å <sup>3</sup>                   |                       |
| Z                                 | 4                                           |                       |
| Density (calculated)              | 1.250 Mg/m <sup>3</sup>                     |                       |
| Absorption coefficient            | 0.627 mm <sup>-1</sup>                      |                       |
| F(000)                            | 1360                                        |                       |
| Crystal size                      | .01 x .01 x .3 mm <sup>3</sup>              |                       |
| Theta range for data collection   | 4.427 to 59.996°.                           |                       |
| Index ranges                      | -6<=h<=5, -10<=k<=22, -34<=l<=34            |                       |
| Reflections collected             | 16576                                       |                       |
| Independent reflections           | 4491 [R(int) = 0.4735]                      |                       |
| Completeness to theta = 59.996°   | 93.6 %                                      |                       |
| Refinement method                 | Full-matrix least-squares on F <sup>2</sup> |                       |
| Data / restraints / parameters    | 4491 / 83 / 401                             |                       |
| Goodness-of-fit on F <sup>2</sup> | 0.878                                       |                       |
| Final R indices [I>2sigma(I)]     | R1 = 0.1407, wR2 = 0.3318                   |                       |
| R indices (all data)              | R1 = 0.3023, wR2 = 0.4251                   |                       |
| Absolute structure parameter      | -3.1(10)                                    |                       |
| Largest diff. peak and hole       | 0.356 and -0.452 e. Å <sup>-3</sup>         |                       |

Table S2. Bond lengths [ $\text{\AA}$ ] and angles [ $^\circ$ ] for porf.

---

|              |           |
|--------------|-----------|
| O(1)-C(11)   | 1.25(3)   |
| O(2)-C(30)   | 1.17(2)   |
| O(3)-C(30)   | 1.30(2)   |
| O(3)-C(31)   | 1.48(3)   |
| N(1)-C(2)    | 1.36(2)   |
| N(1)-C(5)    | 1.386(19) |
| N(2)-C(22)   | 1.368(19) |
| N(2)-C(19)   | 1.371(18) |
| N(2)-H(2)    | 0.8600    |
| N(3)-C(10)   | 1.346(19) |
| N(3)-C(7)    | 1.378(18) |
| N(3)-H(3)    | 0.8600    |
| N(4)-C(17)   | 1.372(18) |
| N(4)-C(14)   | 1.398(17) |
| C(2)-C(3)    | 1.38(2)   |
| C(2)-C(23)   | 1.44(3)   |
| C(3)-C(4)    | 1.39(3)   |
| C(3)-C(24)   | 1.47(3)   |
| C(4)-C(5)    | 1.44(3)   |
| C(4)-C(25)   | 1.53(3)   |
| C(5)-C(6)    | 1.42(2)   |
| C(6)-C(7)    | 1.36(2)   |
| C(6)-H(6)    | 0.9300    |
| C(7)-C(8)    | 1.42(3)   |
| C(8)-C(9)    | 1.35(3)   |
| C(8)-C(27)   | 1.49(2)   |
| C(9)-C(10)   | 1.44(3)   |
| C(9)-C(11)   | 1.51(4)   |
| C(10)-C(13)  | 1.33(3)   |
| C(11)-C(12)  | 1.50(3)   |
| C(12)-C(13)  | 1.55(3)   |
| C(12)-H(12A) | 0.9700    |
| C(12)-H(12B) | 0.9700    |
| C(13)-C(14)  | 1.41(3)   |
| C(14)-C(15)  | 1.45(2)   |
| C(15)-C(28)  | 1.47(2)   |
| C(15)-C(16)  | 1.55(2)   |
| C(15)-H(15)  | 0.8(3)    |
| C(16)-C(17)  | 1.45(3)   |
| C(16)-C(32)  | 1.48(2)   |
| C(16)-H(16)  | 1.01(4)   |
| C(17)-C(18)  | 1.42(2)   |
| C(18)-C(19)  | 1.33(2)   |
| C(18)-H(18)  | 0.9300    |
| C(19)-C(20)  | 1.46(3)   |
| C(20)-C(21)  | 1.31(2)   |
| C(20)-C(33)  | 1.48(2)   |
| C(21)-C(22)  | 1.43(3)   |
| C(21)-C(34)  | 1.47(3)   |
| C(22)-C(23)  | 1.37(3)   |
| C(23)-H(23)  | 0.9300    |
| C(24)-H(24A) | 0.9600    |
| C(24)-H(24B) | 0.9600    |
| C(24)-H(24C) | 0.9600    |
| C(25)-C(26)  | 1.49(3)   |
| C(25)-H(25A) | 0.9700    |
| C(25)-H(25B) | 0.9700    |
| C(26)-H(26A) | 0.9600    |
| C(26)-H(26B) | 0.9600    |
| C(26)-H(26C) | 0.9600    |



|                  |           |
|------------------|-----------|
| C(27)-H(27A)     | 0.9600    |
| C(27)-H(27B)     | 0.9600    |
| C(27)-H(27C)     | 0.9600    |
| C(28)-C(29)      | 1.56(3)   |
| C(28)-H(28A)     | 0.9700    |
| C(28)-H(28B)     | 0.9700    |
| C(29)-C(30)      | 1.53(3)   |
| C(29)-H(29A)     | 0.9700    |
| C(29)-H(29B)     | 0.9700    |
| C(31)-H(31A)     | 0.9600    |
| C(31)-H(31B)     | 0.9600    |
| C(31)-H(31C)     | 0.9600    |
| C(32)-H(32A)     | 0.9600    |
| C(32)-H(32B)     | 0.9600    |
| C(32)-H(32C)     | 0.9600    |
| C(33)-H(33A)     | 0.9600    |
| C(33)-H(33B)     | 0.9600    |
| C(33)-H(33C)     | 0.9600    |
| C(34)-C(35)      | 1.35(3)   |
| C(34)-C(42)      | 1.35(3)   |
| C(34)-H(34)      | 1.01(4)   |
| C(35)-C(36)      | 1.56(3)   |
| C(35)-C(42)      | 1.58(3)   |
| C(35)-H(35)      | 1.03(3)   |
| C(36)-C(37)      | 1.3900    |
| C(36)-C(41)      | 1.3900    |
| C(37)-C(38)      | 1.3900    |
| C(37)-H(37)      | 0.9300    |
| C(38)-C(39)      | 1.3900    |
| C(38)-H(38)      | 0.9300    |
| C(39)-C(40)      | 1.3900    |
| C(39)-H(39)      | 0.9300    |
| C(40)-C(41)      | 1.3900    |
| C(40)-H(40)      | 0.9300    |
| C(41)-H(41)      | 0.9300    |
| C(42)-H(42A)     | 0.9700    |
| C(42)-H(42B)     | 0.9700    |
|                  |           |
| C(30)-O(3)-C(31) | 117.8(18) |
| C(2)-N(1)-C(5)   | 102.1(19) |
| C(22)-N(2)-C(19) | 114.8(17) |
| C(22)-N(2)-H(2)  | 122.6     |
| C(19)-N(2)-H(2)  | 122.6     |
| C(10)-N(3)-C(7)  | 112.0(18) |
| C(10)-N(3)-H(3)  | 124.0     |
| C(7)-N(3)-H(3)   | 124.0     |
| C(17)-N(4)-C(14) | 102.6(15) |
| N(1)-C(2)-C(3)   | 117(2)    |
| N(1)-C(2)-C(23)  | 120(2)    |
| C(3)-C(2)-C(23)  | 123(2)    |
| C(2)-C(3)-C(4)   | 103(2)    |
| C(2)-C(3)-C(24)  | 132(2)    |
| C(4)-C(3)-C(24)  | 125(2)    |
| C(3)-C(4)-C(5)   | 107.4(19) |
| C(3)-C(4)-C(25)  | 128(2)    |
| C(5)-C(4)-C(25)  | 124(2)    |
| N(1)-C(5)-C(6)   | 121(2)    |
| N(1)-C(5)-C(4)   | 110(2)    |
| C(6)-C(5)-C(4)   | 129(2)    |
| C(7)-C(6)-C(5)   | 128(2)    |
| C(7)-C(6)-H(6)   | 116.0     |
| C(5)-C(6)-H(6)   | 116.0     |

|                     |           |
|---------------------|-----------|
| C(6)-C(7)-N(3)      | 122(2)    |
| C(6)-C(7)-C(8)      | 130(2)    |
| N(3)-C(7)-C(8)      | 108.5(19) |
| C(9)-C(8)-C(7)      | 103.8(18) |
| C(9)-C(8)-C(27)     | 129(2)    |
| C(7)-C(8)-C(27)     | 127(2)    |
| C(8)-C(9)-C(10)     | 113(3)    |
| C(8)-C(9)-C(11)     | 143(2)    |
| C(10)-C(9)-C(11)    | 104(2)    |
| C(13)-C(10)-N(3)    | 141.2(19) |
| C(13)-C(10)-C(9)    | 116(2)    |
| N(3)-C(10)-C(9)     | 103(2)    |
| O(1)-C(11)-C(12)    | 125(2)    |
| O(1)-C(11)-C(9)     | 127(3)    |
| C(12)-C(11)-C(9)    | 108(2)    |
| C(11)-C(12)-C(13)   | 104.3(18) |
| C(11)-C(12)-H(12A)  | 110.9     |
| C(13)-C(12)-H(12A)  | 110.9     |
| C(11)-C(12)-H(12B)  | 110.9     |
| C(13)-C(12)-H(12B)  | 110.9     |
| H(12A)-C(12)-H(12B) | 108.9     |
| C(10)-C(13)-C(14)   | 128.2(18) |
| C(10)-C(13)-C(12)   | 108(2)    |
| C(14)-C(13)-C(12)   | 124.2(19) |
| N(4)-C(14)-C(13)    | 113.4(18) |
| N(4)-C(14)-C(15)    | 117.0(17) |
| C(13)-C(14)-C(15)   | 129.5(15) |
| C(14)-C(15)-C(28)   | 121(2)    |
| C(14)-C(15)-C(16)   | 100.7(15) |
| C(28)-C(15)-C(16)   | 116.7(16) |
| C(14)-C(15)-H(15)   | 105.9     |
| C(28)-C(15)-H(15)   | 105.9     |
| C(16)-C(15)-H(15)   | 105.9     |
| C(17)-C(16)-C(32)   | 118.5(16) |
| C(17)-C(16)-C(15)   | 103.6(17) |
| C(32)-C(16)-C(15)   | 115.1(18) |
| C(17)-C(16)-H(16)   | 106.3     |
| C(32)-C(16)-H(16)   | 106.3     |
| C(15)-C(16)-H(16)   | 106.3     |
| N(4)-C(17)-C(18)    | 118.9(16) |
| N(4)-C(17)-C(16)    | 115.8(15) |
| C(18)-C(17)-C(16)   | 124.8(18) |
| C(19)-C(18)-C(17)   | 133.4(19) |
| C(19)-C(18)-H(18)   | 113.3     |
| C(17)-C(18)-H(18)   | 113.3     |
| C(18)-C(19)-N(2)    | 126.5(19) |
| C(18)-C(19)-C(20)   | 130.1(19) |
| N(2)-C(19)-C(20)    | 102.5(18) |
| C(21)-C(20)-C(19)   | 108.7(18) |
| C(21)-C(20)-C(33)   | 127.5(18) |
| C(19)-C(20)-C(33)   | 124(2)    |
| C(20)-C(21)-C(22)   | 111.6(18) |
| C(20)-C(21)-C(34)   | 131(2)    |
| C(22)-C(21)-C(34)   | 118(2)    |
| N(2)-C(22)-C(23)    | 127(2)    |
| N(2)-C(22)-C(21)    | 102.1(18) |
| C(23)-C(22)-C(21)   | 130(2)    |
| C(22)-C(23)-C(2)    | 131(2)    |
| C(22)-C(23)-H(23)   | 114.5     |
| C(2)-C(23)-H(23)    | 114.5     |
| C(3)-C(24)-H(24A)   | 109.5     |
| C(3)-C(24)-H(24B)   | 109.5     |

|                     |           |
|---------------------|-----------|
| H(24A)-C(24)-H(24B) | 109.5     |
| C(3)-C(24)-H(24C)   | 109.5     |
| H(24A)-C(24)-H(24C) | 109.5     |
| H(24B)-C(24)-H(24C) | 109.5     |
| C(26)-C(25)-C(4)    | 112.6(18) |
| C(26)-C(25)-H(25A)  | 109.1     |
| C(4)-C(25)-H(25A)   | 109.1     |
| C(26)-C(25)-H(25B)  | 109.1     |
| C(4)-C(25)-H(25B)   | 109.1     |
| H(25A)-C(25)-H(25B) | 107.8     |
| C(25)-C(26)-H(26A)  | 109.5     |
| C(25)-C(26)-H(26B)  | 109.5     |
| H(26A)-C(26)-H(26B) | 109.5     |
| C(25)-C(26)-H(26C)  | 109.5     |
| H(26A)-C(26)-H(26C) | 109.5     |
| H(26B)-C(26)-H(26C) | 109.5     |
| C(8)-C(27)-H(27A)   | 109.5     |
| C(8)-C(27)-H(27B)   | 109.5     |
| H(27A)-C(27)-H(27B) | 109.5     |
| C(8)-C(27)-H(27C)   | 109.5     |
| H(27A)-C(27)-H(27C) | 109.5     |
| H(27B)-C(27)-H(27C) | 109.5     |
| C(15)-C(28)-C(29)   | 118(2)    |
| C(15)-C(28)-H(28A)  | 107.8     |
| C(29)-C(28)-H(28A)  | 107.8     |
| C(15)-C(28)-H(28B)  | 107.8     |
| C(29)-C(28)-H(28B)  | 107.8     |
| H(28A)-C(28)-H(28B) | 107.2     |
| C(30)-C(29)-C(28)   | 113.3(19) |
| C(30)-C(29)-H(29A)  | 108.9     |
| C(28)-C(29)-H(29A)  | 108.9     |
| C(30)-C(29)-H(29B)  | 108.9     |
| C(28)-C(29)-H(29B)  | 108.9     |
| H(29A)-C(29)-H(29B) | 107.7     |
| O(2)-C(30)-O(3)     | 129(2)    |
| O(2)-C(30)-C(29)    | 122(2)    |
| O(3)-C(30)-C(29)    | 108(2)    |
| O(3)-C(31)-H(31A)   | 109.5     |
| O(3)-C(31)-H(31B)   | 109.5     |
| H(31A)-C(31)-H(31B) | 109.5     |
| O(3)-C(31)-H(31C)   | 109.5     |
| H(31A)-C(31)-H(31C) | 109.5     |
| H(31B)-C(31)-H(31C) | 109.5     |
| C(16)-C(32)-H(32A)  | 109.5     |
| C(16)-C(32)-H(32B)  | 109.5     |
| H(32A)-C(32)-H(32B) | 109.5     |
| C(16)-C(32)-H(32C)  | 109.5     |
| H(32A)-C(32)-H(32C) | 109.5     |
| H(32B)-C(32)-H(32C) | 109.5     |
| C(20)-C(33)-H(33A)  | 109.5     |
| C(20)-C(33)-H(33B)  | 109.5     |
| H(33A)-C(33)-H(33B) | 109.5     |
| C(20)-C(33)-H(33C)  | 109.5     |
| H(33A)-C(33)-H(33C) | 109.5     |
| H(33B)-C(33)-H(33C) | 109.5     |
| C(35)-C(34)-C(42)   | 71.6(19)  |
| C(35)-C(34)-C(21)   | 135(3)    |
| C(42)-C(34)-C(21)   | 131(3)    |
| C(35)-C(34)-H(34)   | 104.7     |
| C(42)-C(34)-H(34)   | 104.7     |
| C(21)-C(34)-H(34)   | 104.7     |
| C(34)-C(35)-C(36)   | 125(3)    |

|                     |           |
|---------------------|-----------|
| C(34)-C(35)-C(42)   | 54.2(15)  |
| C(36)-C(35)-C(42)   | 117(3)    |
| C(34)-C(35)-H(35)   | 115.3     |
| C(36)-C(35)-H(35)   | 115.3     |
| C(42)-C(35)-H(35)   | 115.3     |
| C(37)-C(36)-C(41)   | 120.0     |
| C(37)-C(36)-C(35)   | 118(2)    |
| C(41)-C(36)-C(35)   | 121(2)    |
| C(36)-C(37)-C(38)   | 120.00(5) |
| C(36)-C(37)-H(37)   | 120.0     |
| C(38)-C(37)-H(37)   | 120.0     |
| C(39)-C(38)-C(37)   | 120.00(8) |
| C(39)-C(38)-H(38)   | 120.0     |
| C(37)-C(38)-H(38)   | 120.0     |
| C(40)-C(39)-C(38)   | 120.0     |
| C(40)-C(39)-H(39)   | 120.0     |
| C(38)-C(39)-H(39)   | 120.0     |
| C(41)-C(40)-C(39)   | 120.00(8) |
| C(41)-C(40)-H(40)   | 120.0     |
| C(39)-C(40)-H(40)   | 120.0     |
| C(40)-C(41)-C(36)   | 120.00(9) |
| C(40)-C(41)-H(41)   | 120.0     |
| C(36)-C(41)-H(41)   | 120.0     |
| C(34)-C(42)-C(35)   | 54.2(15)  |
| C(34)-C(42)-H(42A)  | 118.3     |
| C(35)-C(42)-H(42A)  | 118.3     |
| C(34)-C(42)-H(42B)  | 118.3     |
| C(35)-C(42)-H(42B)  | 118.3     |
| H(42A)-C(42)-H(42B) | 115.6     |

---

Symmetry transformations used to generate equivalent atoms:

Table S3. Torsion angles [°] for **9a**.

|                         |            |
|-------------------------|------------|
| C(5)-N(1)-C(2)-C(3)     | 0(2)       |
| C(5)-N(1)-C(2)-C(23)    | -173.8(19) |
| N(1)-C(2)-C(3)-C(4)     | 4(2)       |
| C(23)-C(2)-C(3)-C(4)    | 176.7(19)  |
| N(1)-C(2)-C(3)-C(24)    | -178(2)    |
| C(23)-C(2)-C(3)-C(24)   | -5(4)      |
| C(2)-C(3)-C(4)-C(5)     | -5(2)      |
| C(24)-C(3)-C(4)-C(5)    | 176(2)     |
| C(2)-C(3)-C(4)-C(25)    | 176(2)     |
| C(24)-C(3)-C(4)-C(25)   | -2(3)      |
| C(2)-N(1)-C(5)-C(6)     | -178.3(17) |
| C(2)-N(1)-C(5)-C(4)     | -3(2)      |
| C(3)-C(4)-C(5)-N(1)     | 5(2)       |
| C(25)-C(4)-C(5)-N(1)    | -176.1(19) |
| C(3)-C(4)-C(5)-C(6)     | -179.9(19) |
| C(25)-C(4)-C(5)-C(6)    | -1(3)      |
| N(1)-C(5)-C(6)-C(7)     | -3(3)      |
| C(4)-C(5)-C(6)-C(7)     | -177(2)    |
| C(5)-C(6)-C(7)-N(3)     | 5(3)       |
| C(5)-C(6)-C(7)-C(8)     | -178.7(18) |
| C(10)-N(3)-C(7)-C(6)    | 176.8(18)  |
| C(10)-N(3)-C(7)-C(8)    | 0(2)       |
| C(6)-C(7)-C(8)-C(9)     | -177(2)    |
| N(3)-C(7)-C(8)-C(9)     | 0(2)       |
| C(6)-C(7)-C(8)-C(27)    | 5(3)       |
| N(3)-C(7)-C(8)-C(27)    | -178.2(18) |
| C(7)-C(8)-C(9)-C(10)    | 1(2)       |
| C(27)-C(8)-C(9)-C(10)   | 178.4(18)  |
| C(7)-C(8)-C(9)-C(11)    | -176(3)    |
| C(27)-C(8)-C(9)-C(11)   | 1(4)       |
| C(7)-N(3)-C(10)-C(13)   | 178(2)     |
| C(7)-N(3)-C(10)-C(9)    | 0(2)       |
| C(8)-C(9)-C(10)-C(13)   | -178.8(18) |
| C(11)-C(9)-C(10)-C(13)  | -1(2)      |
| C(8)-C(9)-C(10)-N(3)    | -1(2)      |
| C(11)-C(9)-C(10)-N(3)   | 177.5(16)  |
| C(8)-C(9)-C(11)-O(1)    | -6(4)      |
| C(10)-C(9)-C(11)-O(1)   | 177(2)     |
| C(8)-C(9)-C(11)-C(12)   | 180(3)     |
| C(10)-C(9)-C(11)-C(12)  | 3(2)       |
| O(1)-C(11)-C(12)-C(13)  | -177(2)    |
| C(9)-C(11)-C(12)-C(13)  | -3(2)      |
| N(3)-C(10)-C(13)-C(14)  | -3(4)      |
| C(9)-C(10)-C(13)-C(14)  | 174.5(18)  |
| N(3)-C(10)-C(13)-C(12)  | -179(2)    |
| C(9)-C(10)-C(13)-C(12)  | -1(2)      |
| C(11)-C(12)-C(13)-C(10) | 3(2)       |
| C(11)-C(12)-C(13)-C(14) | -173.3(19) |
| C(17)-N(4)-C(14)-C(13)  | 177.6(17)  |
| C(17)-N(4)-C(14)-C(15)  | -2(2)      |
| C(10)-C(13)-C(14)-N(4)  | 4(3)       |
| C(12)-C(13)-C(14)-N(4)  | 179.1(16)  |
| C(10)-C(13)-C(14)-C(15) | -176(2)    |
| C(12)-C(13)-C(14)-C(15) | -1(3)      |
| N(4)-C(14)-C(15)-C(28)  | 129.0(17)  |
| C(13)-C(14)-C(15)-C(28) | -51(3)     |
| N(4)-C(14)-C(15)-C(16)  | -1(2)      |
| C(13)-C(14)-C(15)-C(16) | 179.1(19)  |
| C(14)-C(15)-C(16)-C(17) | 4(2)       |
| C(28)-C(15)-C(16)-C(17) | -129(2)    |

|                         |            |
|-------------------------|------------|
| C(14)-C(15)-C(16)-C(32) | -127(2)    |
| C(28)-C(15)-C(16)-C(32) | 100(2)     |
| C(14)-N(4)-C(17)-C(18)  | 177.5(15)  |
| C(14)-N(4)-C(17)-C(16)  | 5(2)       |
| C(32)-C(16)-C(17)-N(4)  | 123(2)     |
| C(15)-C(16)-C(17)-N(4)  | -6(2)      |
| C(32)-C(16)-C(17)-C(18) | -49(3)     |
| C(15)-C(16)-C(17)-C(18) | -177.8(17) |
| N(4)-C(17)-C(18)-C(19)  | 6(3)       |
| C(16)-C(17)-C(18)-C(19) | 178(2)     |
| C(17)-C(18)-C(19)-N(2)  | -10(3)     |
| C(17)-C(18)-C(19)-C(20) | -177.2(19) |
| C(22)-N(2)-C(19)-C(18)  | -175.8(19) |
| C(22)-N(2)-C(19)-C(20)  | -6(2)      |
| C(18)-C(19)-C(20)-C(21) | 173(2)     |
| N(2)-C(19)-C(20)-C(21)  | 3(2)       |
| C(18)-C(19)-C(20)-C(33) | -10(3)     |
| N(2)-C(19)-C(20)-C(33)  | -179.6(19) |
| C(19)-C(20)-C(21)-C(22) | 0(2)       |
| C(33)-C(20)-C(21)-C(22) | -177(2)    |
| C(19)-C(20)-C(21)-C(34) | 180(3)     |
| C(33)-C(20)-C(21)-C(34) | 3(4)       |
| C(19)-N(2)-C(22)-C(23)  | -179(2)    |
| C(19)-N(2)-C(22)-C(21)  | 6(2)       |
| C(20)-C(21)-C(22)-N(2)  | -3(2)      |
| C(34)-C(21)-C(22)-N(2)  | 177(2)     |
| C(20)-C(21)-C(22)-C(23) | -178(2)    |
| C(34)-C(21)-C(22)-C(23) | 2(4)       |
| N(2)-C(22)-C(23)-C(2)   | 9(4)       |
| C(21)-C(22)-C(23)-C(2)  | -178(2)    |
| N(1)-C(2)-C(23)-C(22)   | -10(4)     |
| C(3)-C(2)-C(23)-C(22)   | 177(3)     |
| C(3)-C(4)-C(25)-C(26)   | -89(3)     |
| C(5)-C(4)-C(25)-C(26)   | 93(3)      |
| C(14)-C(15)-C(28)-C(29) | -178.5(16) |
| C(16)-C(15)-C(28)-C(29) | -56(3)     |
| C(15)-C(28)-C(29)-C(30) | -69(2)     |
| C(31)-O(3)-C(30)-O(2)   | -4(4)      |
| C(31)-O(3)-C(30)-C(29)  | 179(2)     |
| C(28)-C(29)-C(30)-O(2)  | 2(4)       |
| C(28)-C(29)-C(30)-O(3)  | 179.6(19)  |
| C(20)-C(21)-C(34)-C(35) | 119(4)     |
| C(22)-C(21)-C(34)-C(35) | -61(5)     |
| C(20)-C(21)-C(34)-C(42) | 14(6)      |
| C(22)-C(21)-C(34)-C(42) | -167(4)    |
| C(42)-C(34)-C(35)-C(36) | -99(4)     |
| C(21)-C(34)-C(35)-C(36) | 131(4)     |
| C(21)-C(34)-C(35)-C(42) | -130(5)    |
| C(34)-C(35)-C(36)-C(37) | 96(3)      |
| C(42)-C(35)-C(36)-C(37) | 33(4)      |
| C(34)-C(35)-C(36)-C(41) | -94(3)     |
| C(42)-C(35)-C(36)-C(41) | -158(3)    |
| C(41)-C(36)-C(37)-C(38) | 0.0        |
| C(35)-C(36)-C(37)-C(38) | 170(3)     |
| C(36)-C(37)-C(38)-C(39) | 0.0        |
| C(37)-C(38)-C(39)-C(40) | 0.0        |
| C(38)-C(39)-C(40)-C(41) | 0.0        |
| C(39)-C(40)-C(41)-C(36) | 0.0        |
| C(37)-C(36)-C(41)-C(40) | 0.0        |
| C(35)-C(36)-C(41)-C(40) | -170(3)    |
| C(21)-C(34)-C(42)-C(35) | 134(4)     |
| C(36)-C(35)-C(42)-C(34) | 116(4)     |

---

Symmetry transformations used to generate equivalent atoms:

Table S4. Hydrogen bonds for **9a** [Å and °].

---

| D-H...A               | d(D-H) | d(H...A) | d(D...A) | <(DHA) |
|-----------------------|--------|----------|----------|--------|
| N(2)-H(2)...N(1)      | 0.86   | 2.47     | 3.01(3)  | 121.1  |
| N(2)-H(2)...N(4)      | 0.86   | 2.44     | 2.98(2)  | 120.8  |
| N(3)-H(3)...N(1)      | 0.86   | 2.15     | 2.75(3)  | 126.3  |
| C(15)-H(15)...O(2)    | 0.83   | 2.59     | 3.14(3)  | 124.1  |
| C(16)-H(16)...O(2)#1  | 1.01   | 2.57     | 3.53(3)  | 159.2  |
| C(29)-H(29A)...O(2)#1 | 0.97   | 2.57     | 3.40(2)  | 143.6  |

---

Symmetry transformations used to generate equivalent atoms:

#1 x-1,y,z

## NMR Spectra

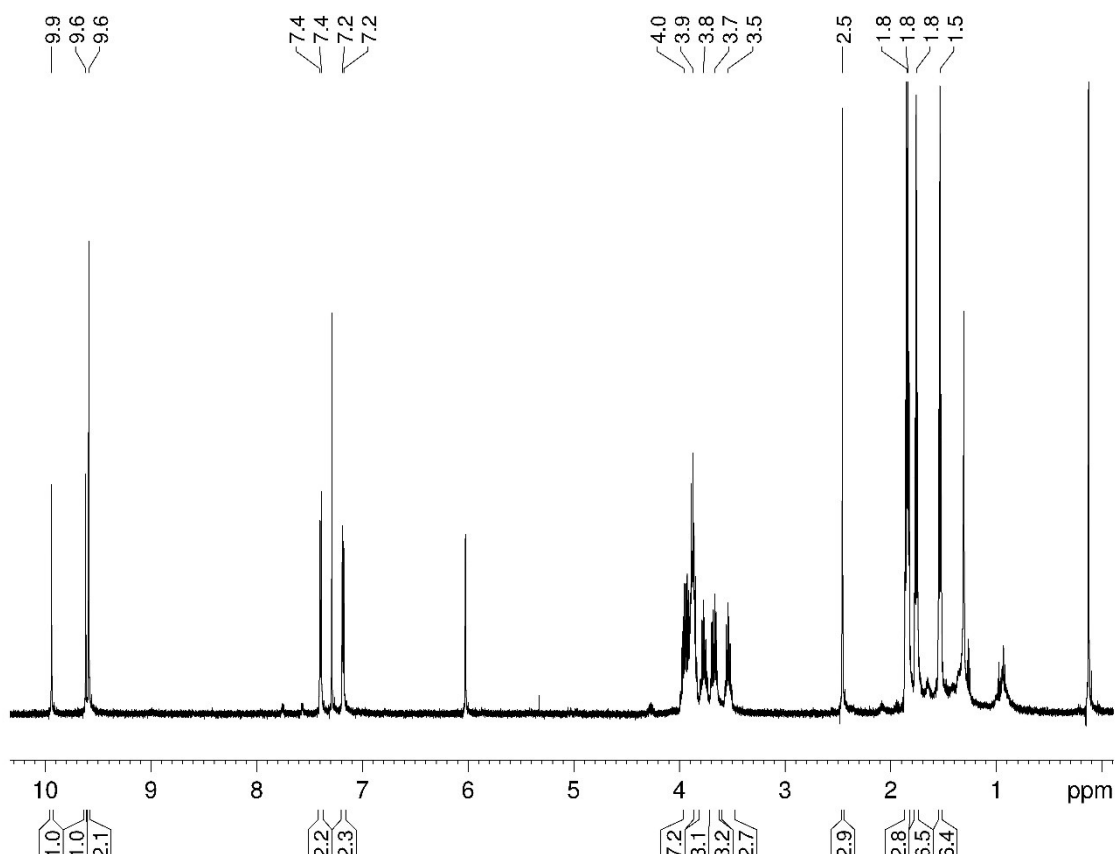

**Figure S2.**  $^1\text{H}$  NMR spectrum of the Ni (II)  $N'$ -(2,3,7,8,12,13,17,18-octaethylporphyrin-5-ylmethylene)-4-methylbenzenesulfonylhydrazide (**5c**) isomer 1 in  $\text{CDCl}_3$ .

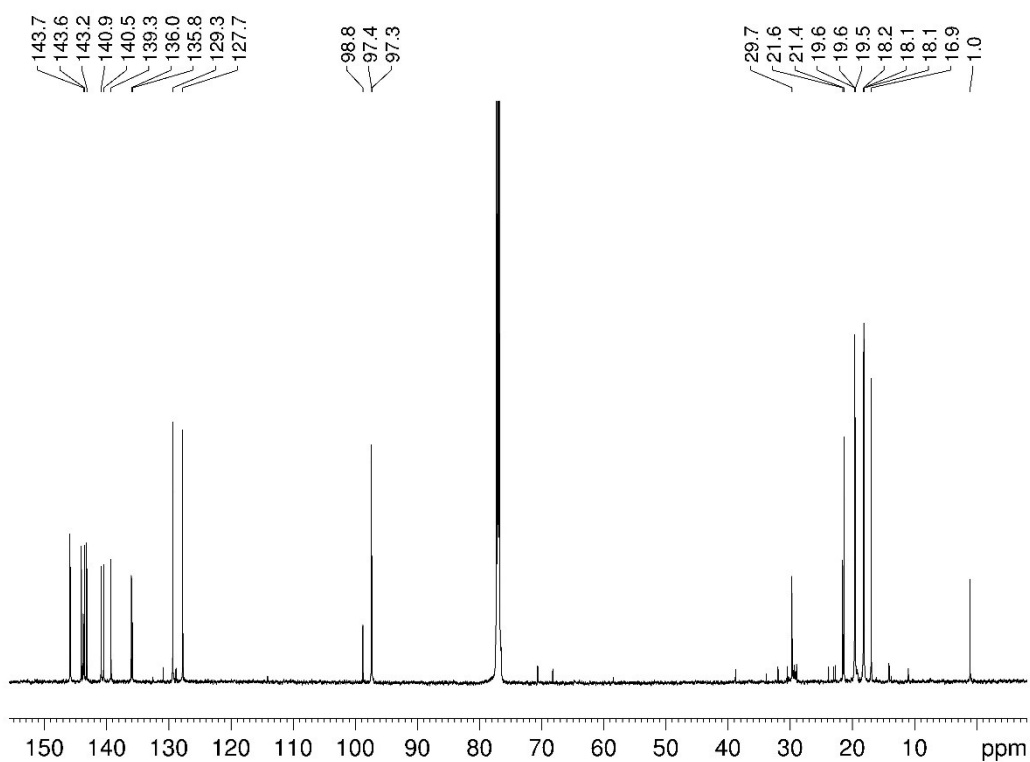

**Figure S3.**  $^{13}\text{C}$  NMR spectrum of the Ni (II)  $N'$ -(2,3,7,8,12,13,17,18-octaethylporphyrin-5-ylmethylene)-4-methylbenzenesulfonylhydrazide (**5c**) isomer 1 in  $\text{CDCl}_3$ .



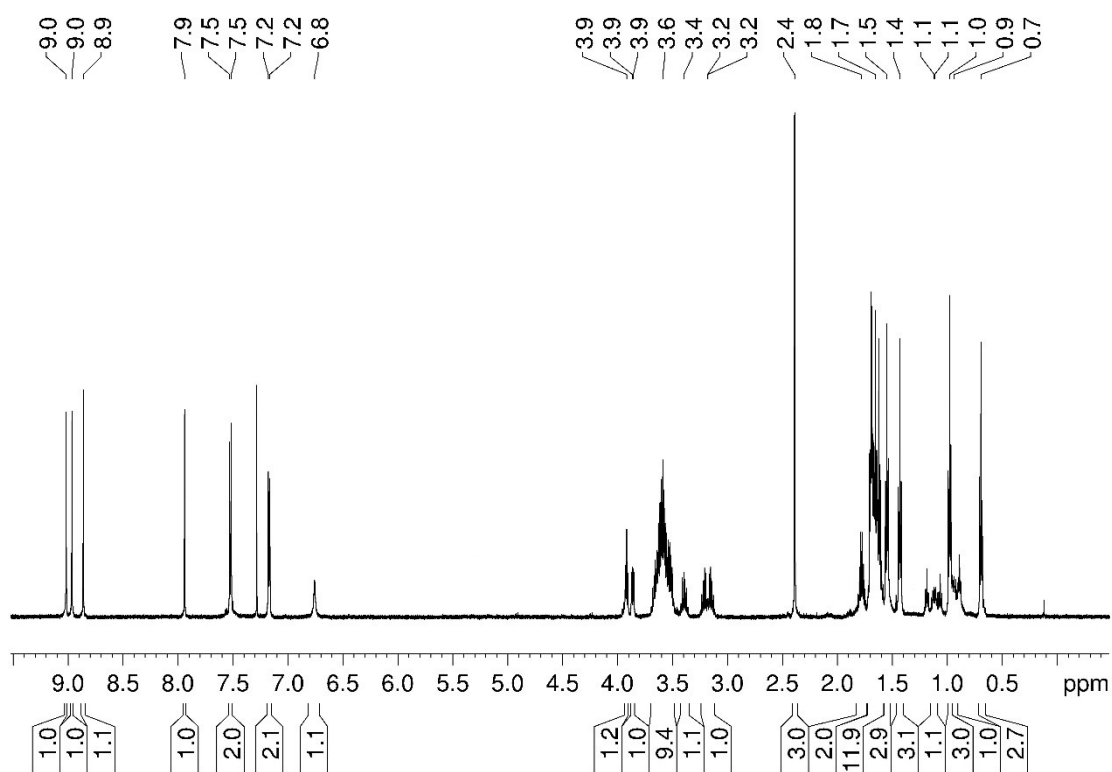

**Figure S4.**  $^1\text{H}$  NMR spectrum of the Ni (II)  $N'$ -(2,3,7,8,12,13,17,18-octaethyl-17,18-*trans*-dihydroporphyrin-5-ylmethylene)-4-methylbenzenesulfonohydrazide (**6c**) isomer 1 in  $\text{CDCl}_3$ .

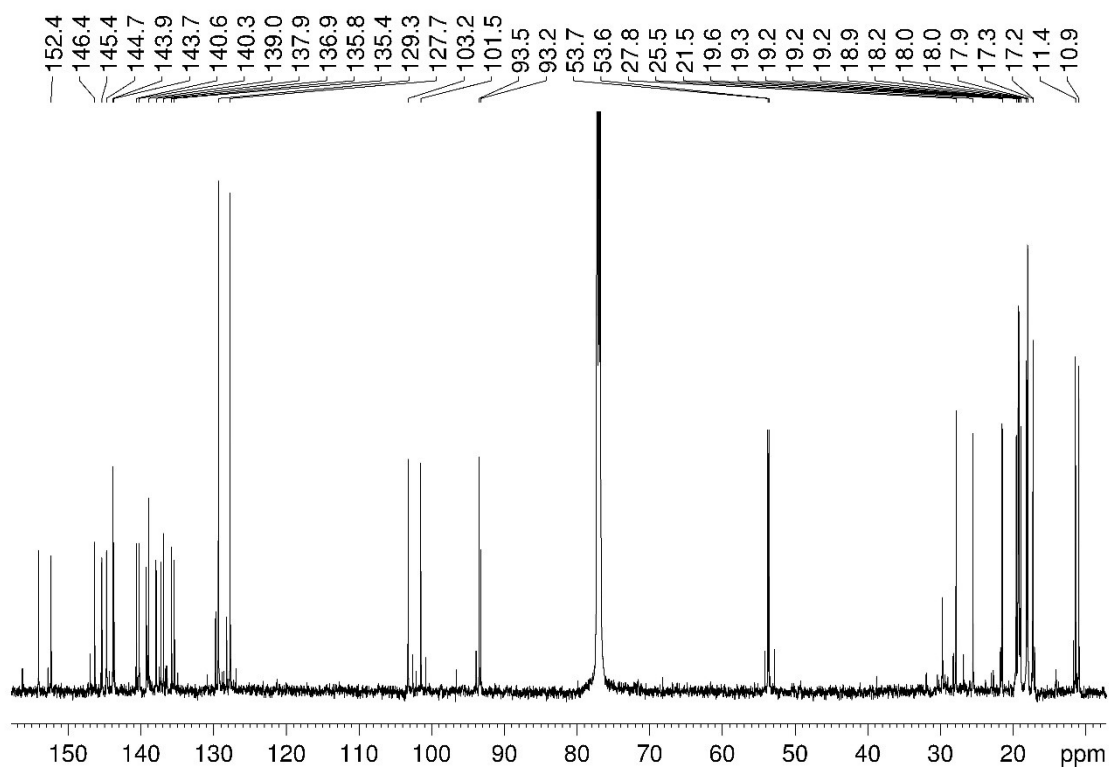

**Figure S5.**  $^{13}\text{C}$  NMR spectrum of the Ni (II)  $N'$ -(2,3,7,8,12,13,17,18-octaethyl-17,18-*trans*-dihydroporphyrin-5-ylmethylene)-4-methylbenzenesulfonohydrazide (**6c**) isomer 1 in  $\text{CDCl}_3$ .

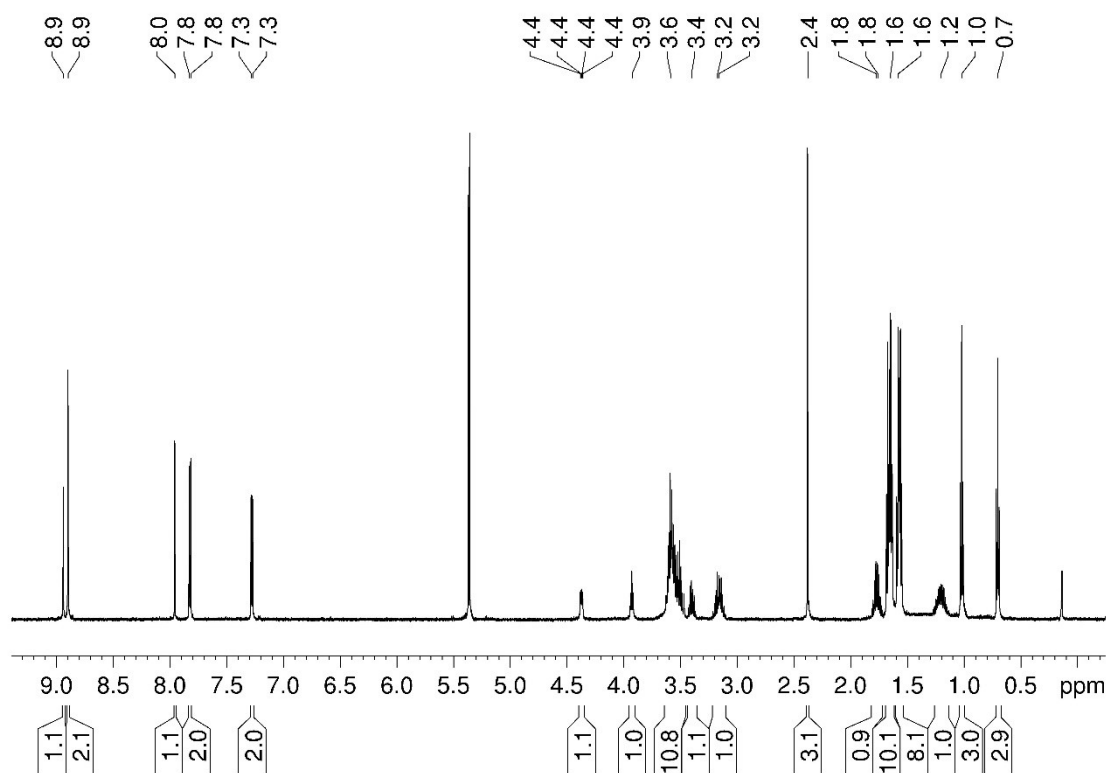

**Figure S6.**  $^1\text{H}$  NMR spectrum of the Ni (II)  $N'$ -(2,3,7,8,12,13,17,18-octaethyl-17,18-*trans*-dihydroporphyrin-5-ylmethylene)-4-methylbenzenesulfonylhydrazide (**6c**) isomer 2 in  $\text{CDCl}_3$ .

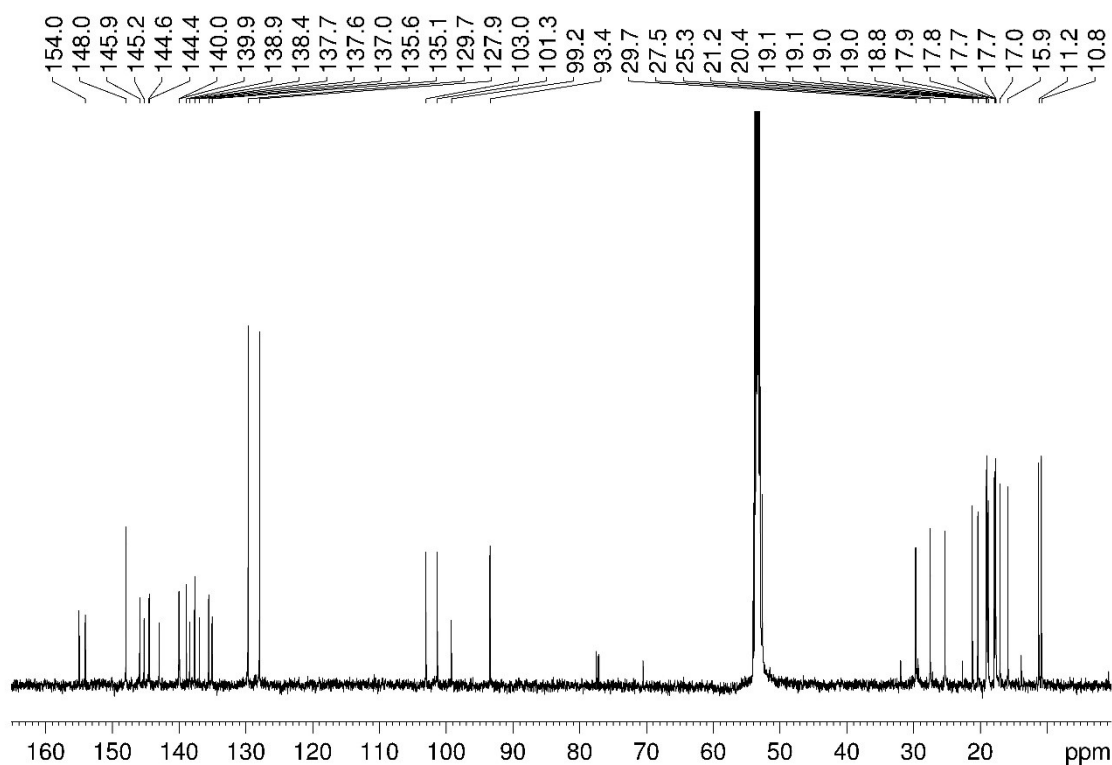

**Figure S7.**  $^{13}\text{C}$  NMR spectrum of the Ni (II)  $N'$ -(2,3,7,8,12,13,17,18-octaethyl-17,18-*trans*-dihydroporphyrin-5-ylmethylene)-4-methylbenzenesulfonylhydrazide (**6c**) isomer 2 in  $\text{CDCl}_3$ .

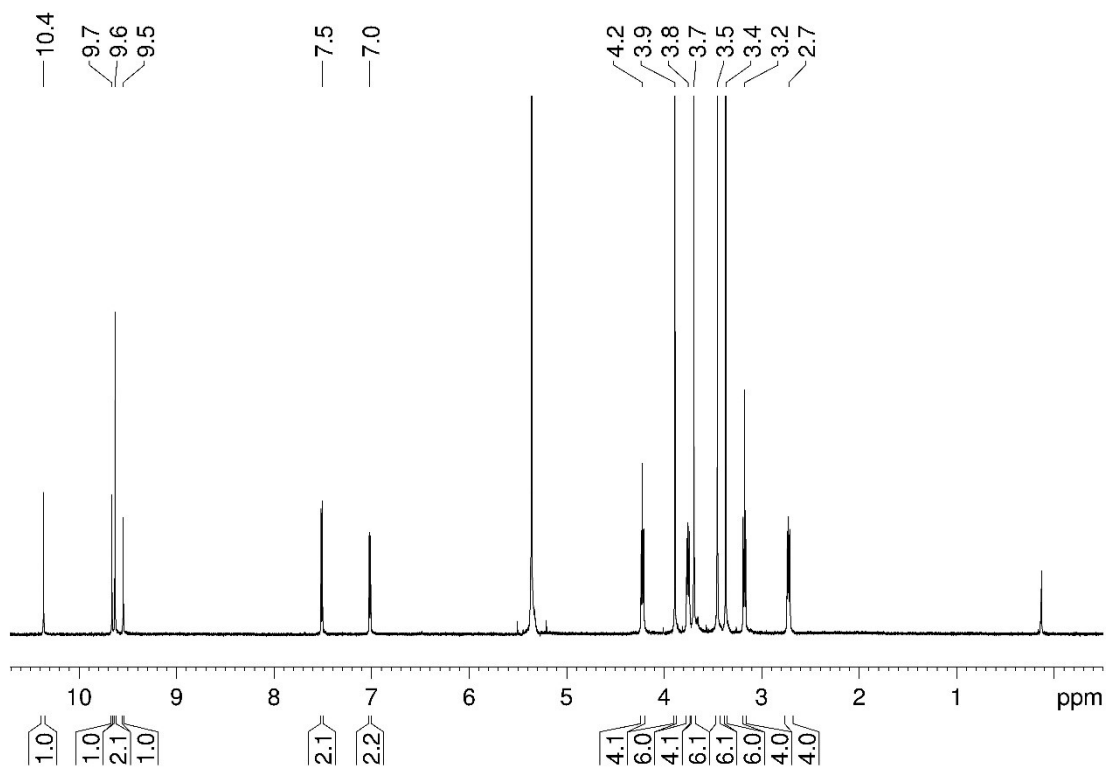

**Figure S8.**  $^1\text{H}$  NMR spectrum of the Ni (II) (*Z*)-*N'*-(3,8,13,18-tetramethyl-2,7,12,17-tetra(2-(ethoxycarbonyl)ethyl)porphyrin-5-ylmethylene)-4-methylbenzenesulfonylhydrazide (**7c**) isomer 1 in  $\text{CDCl}_3$ .

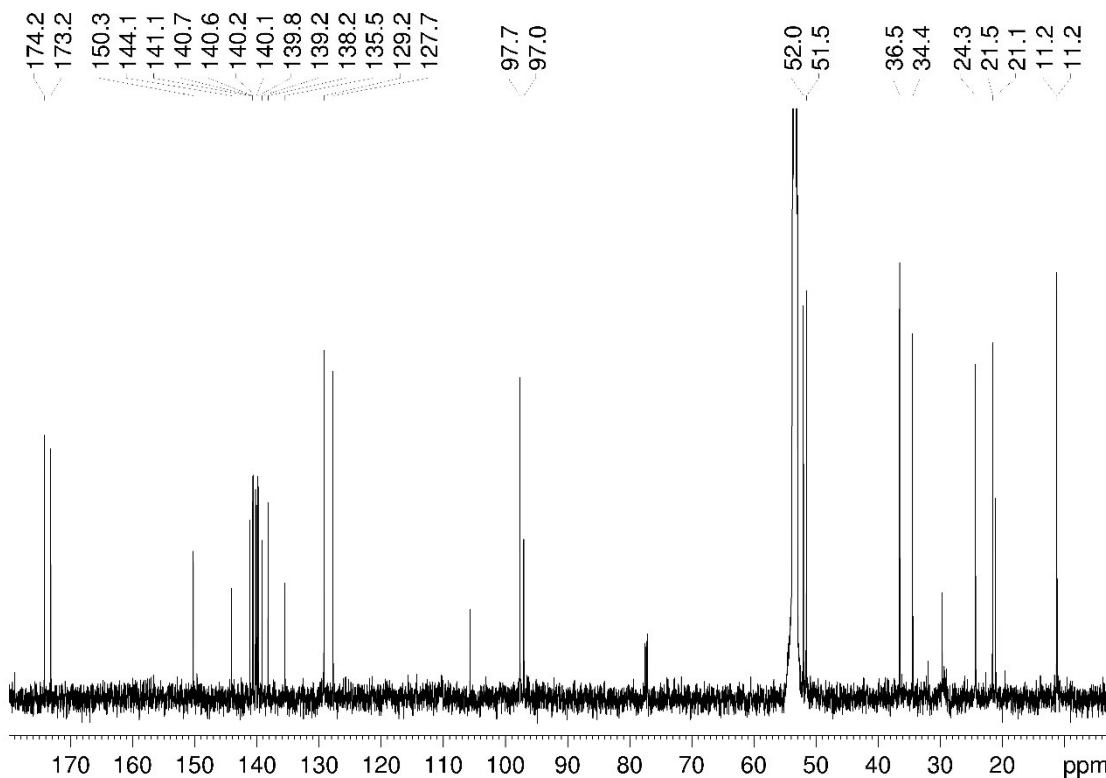

**Figure S9.**  $^{13}\text{C}$  NMR spectrum of the Ni (II) *N'*-(2,3,7,8,12,13,17,18-octaethyl-17,18-*trans*-dihydroporphyrin-5-ylmethylene)-4-methylbenzenesulfonylhydrazide (**7c**) isomer 1 in  $\text{CDCl}_3$ .

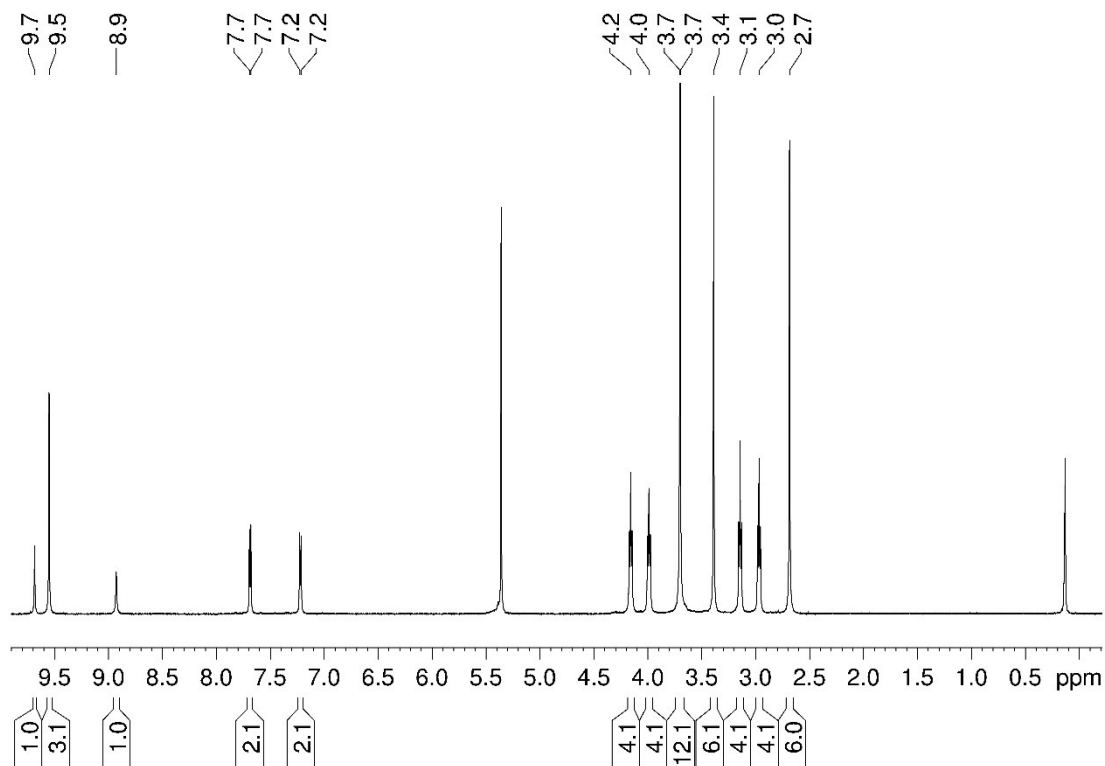

**Figure S10.**  $^1\text{H}$  NMR spectrum of the Ni (II) (*Z*)- $\text{N}^1$ -(3,8,13,18-tetramethyl-2,7,12,17-tetra(2-(ethoxycarbonyl)ethyl)porphyrin-5-ylmethylene)-4-methylbenzenesulfonylhydrazide (**7c**) isomer 2 in  $\text{CDCl}_3$ .

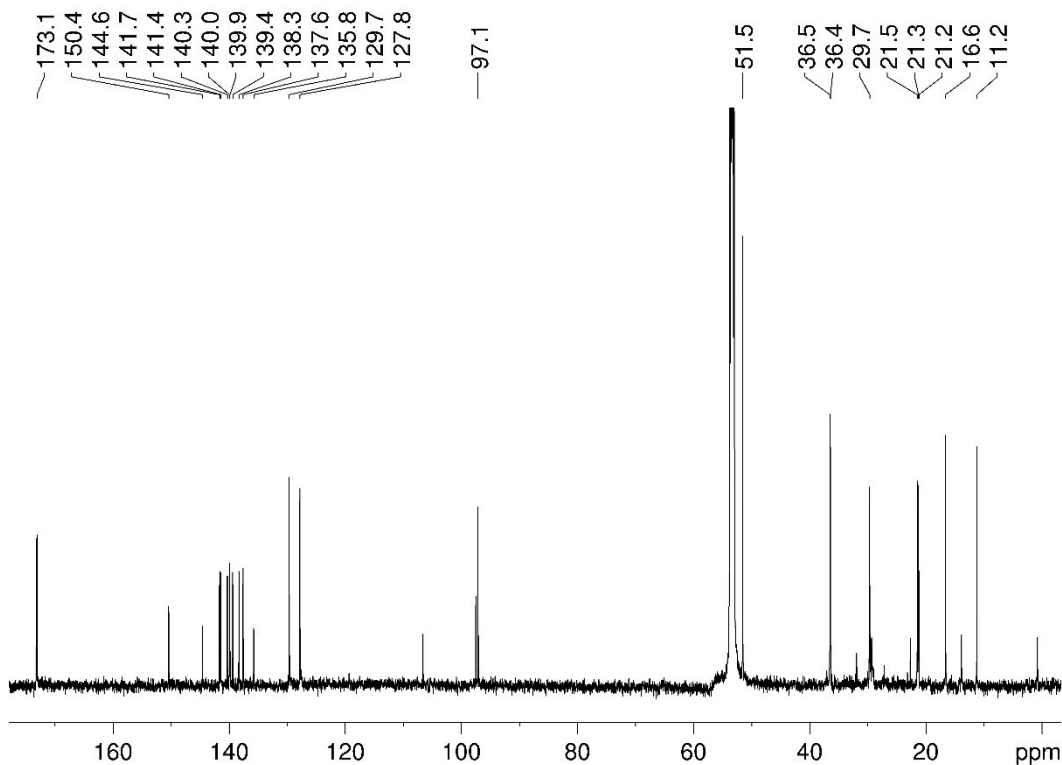

**Figure S11.**  $^{13}\text{C}$  NMR spectrum of the Ni (II)  $\text{N}^1$ -(2,3,7,8,12,13,17,18-octaethyl-17,18-*trans*-dihydroporphyrin-5-ylmethylene)-4-methylbenzenesulfonylhydrazide (**7c**) isomer 2 in  $\text{CDCl}_3$ .

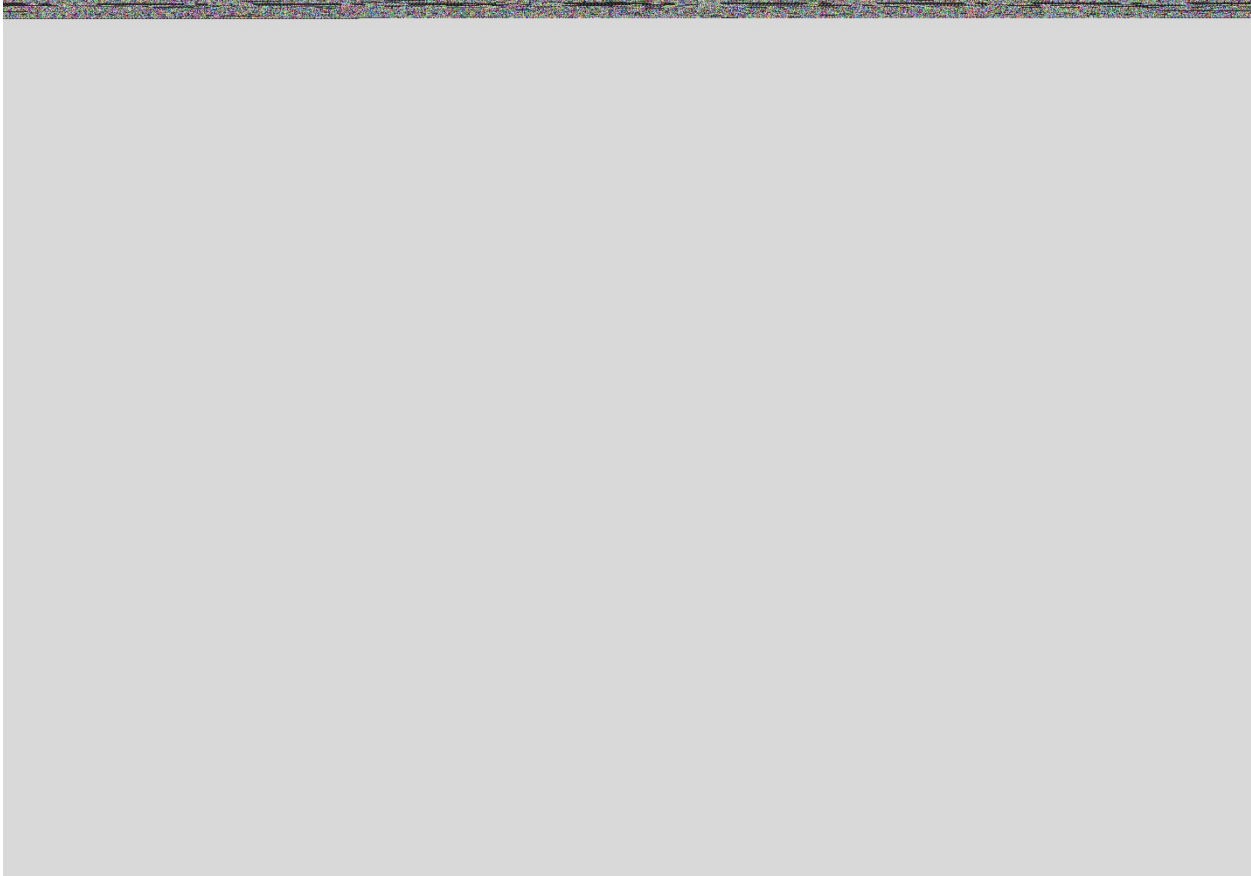

**Figure S12.**  $^1\text{H}$  NMR spectrum of the Ni (II) N'-(3,7,13,17-tetramethyl-2,8,12,18-tetra(2-(methoxycarbonyl)ethyl)porphyrin-5-ylmethylene)-4-methylbenzenesulfonylhydrazide (**8c**) isomer 1 in  $\text{CDCl}_3$ .



**Figure S13.**  $^{13}\text{C}$  NMR spectrum of the Ni (II) N'-(3,7,13,17-tetramethyl-2,8,12,18-tetra(2-(methoxycarbonyl)ethyl)porphyrin-5-ylmethylene)-4-methylbenzenesulfonylhydrazide (**8c**) isomer 1 in  $\text{CDCl}_3$ .

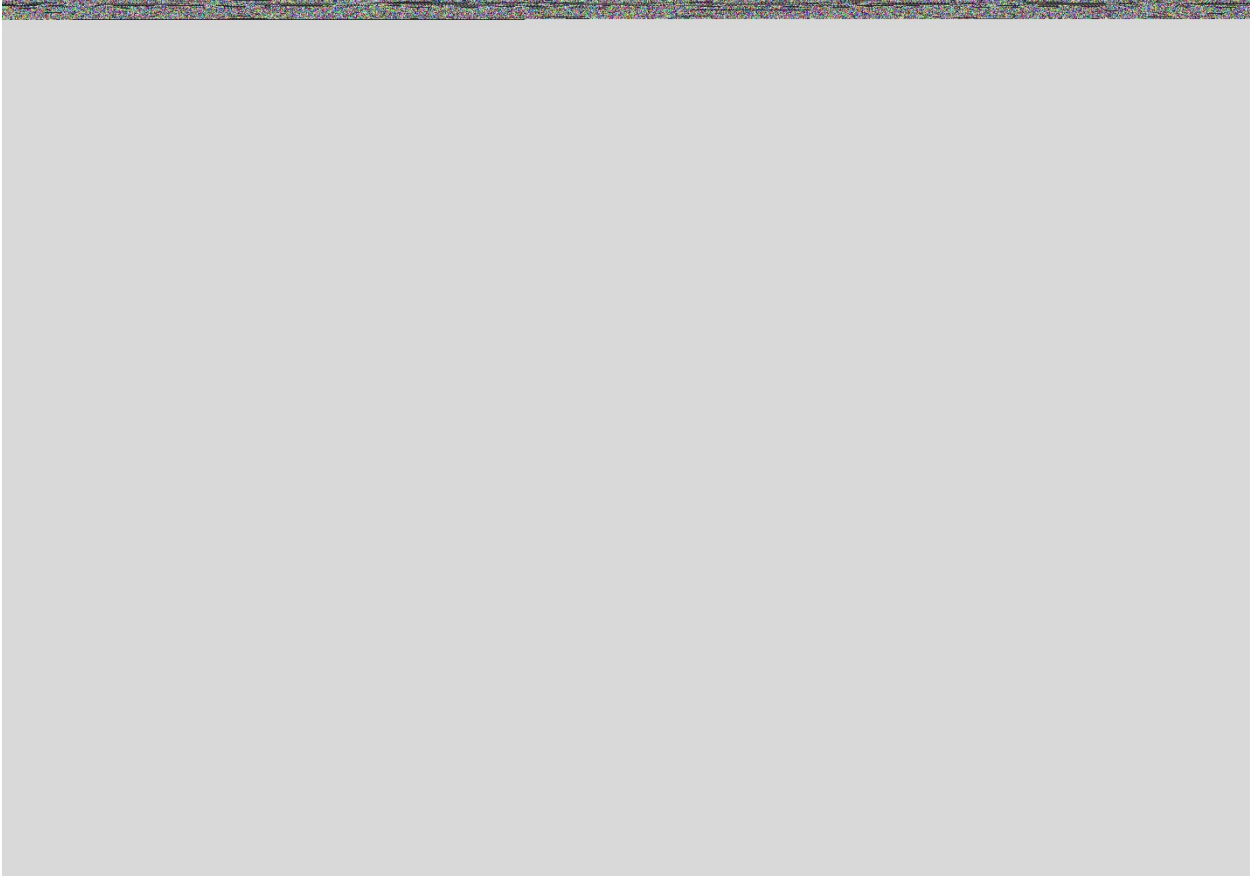

**Figure S14.**  $^1\text{H}$  NMR spectrum of the Ni (II) N'-(3,7,13,17-tetramethyl-2,8,12,18-tetra(2-(methoxycarbonyl)ethyl)porphyrin-5-ylmethylene)-4-methylbenzenesulfonylhydrazide (**8c**) isomer 2 in  $\text{CDCl}_3$ .

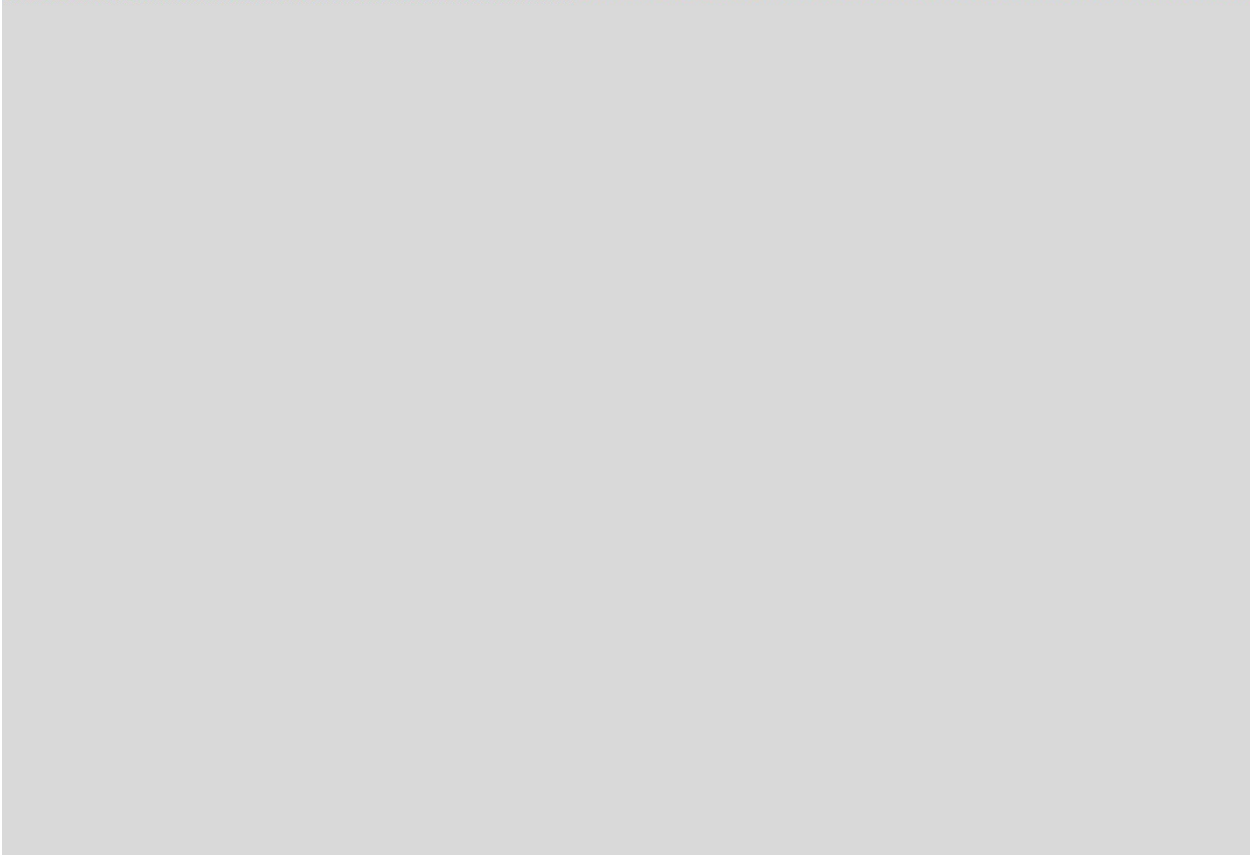

**Figure S15.**  $^{13}\text{C}$  NMR spectrum of the Ni (II) N'-(3,7,13,17-tetramethyl-2,8,12,18-tetra(2-(methoxycarbonyl)ethyl)porphyrin-5-ylmethylene)-4-methylbenzenesulfonylhydrazide (**8c**) isomer 2 in  $\text{CDCl}_3$ .

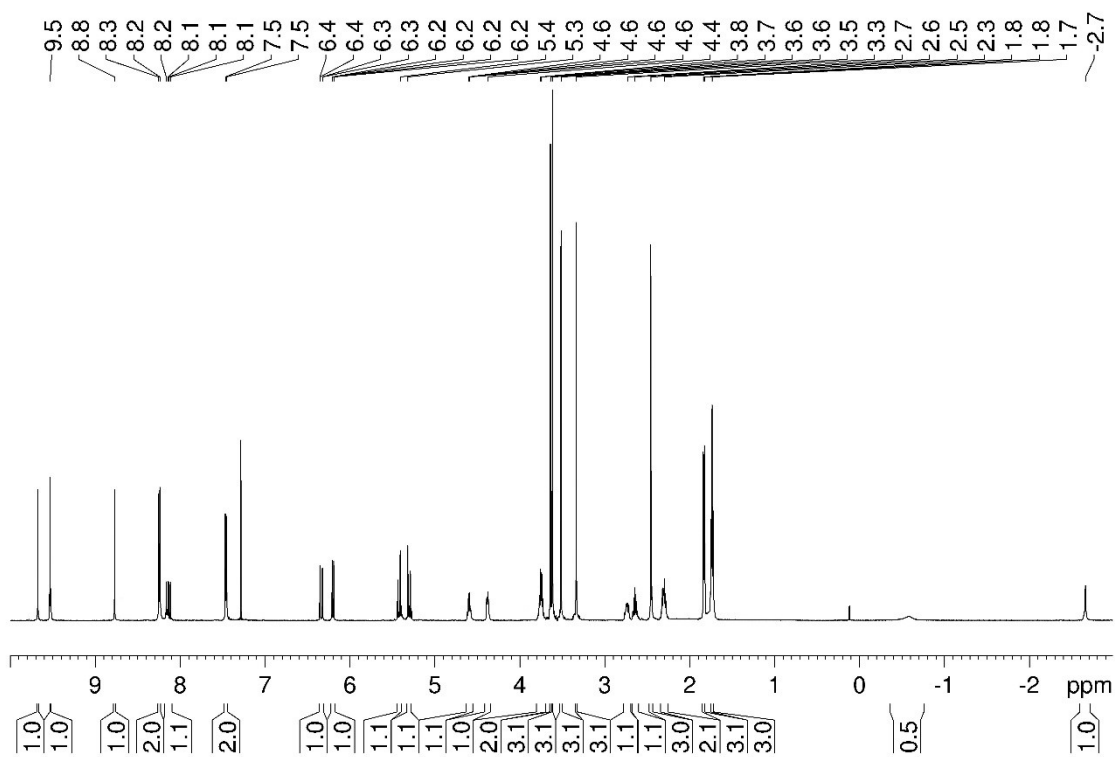

**Figure S16.**  $^1\text{H}$  NMR spectrum of the N-tosylhydrazone of methyl pyropheophorbide-*a* (**4**) in  $\text{CDCl}_3$ .

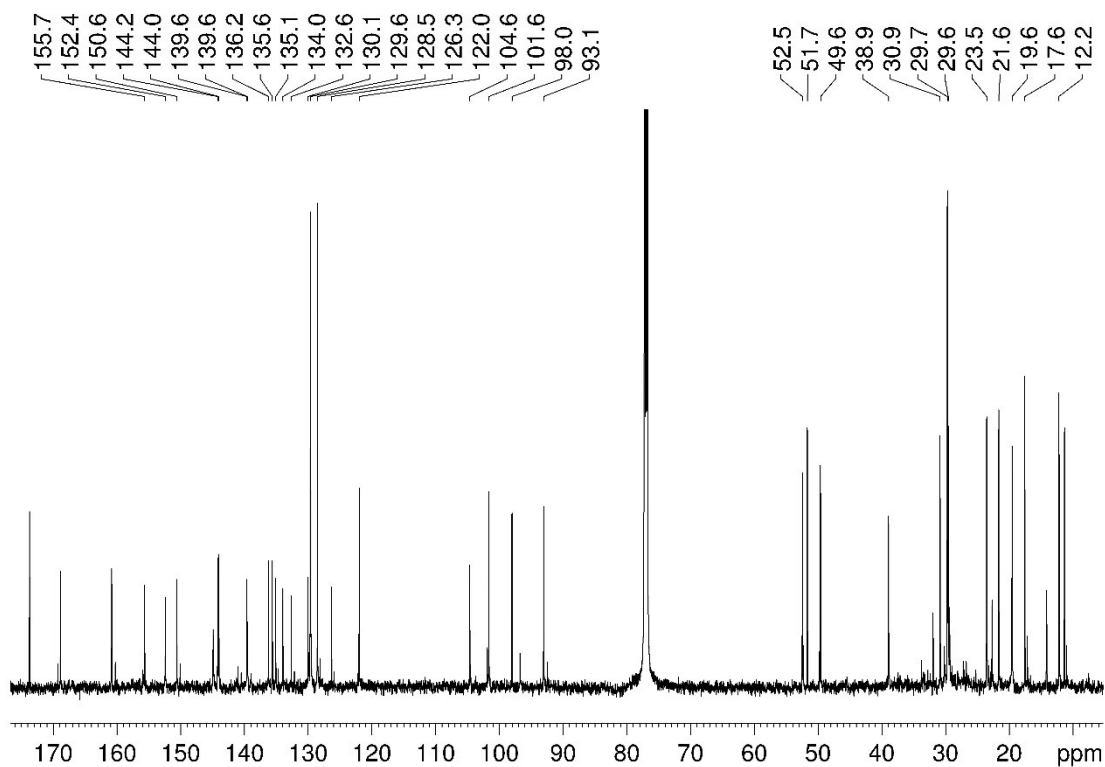

**Figure S17.**  $^{13}\text{C}$  NMR spectrum of the N-tosylhydrazone of methyl pyropheophorbide-*a* (**4**) in  $\text{CDCl}_3$ .

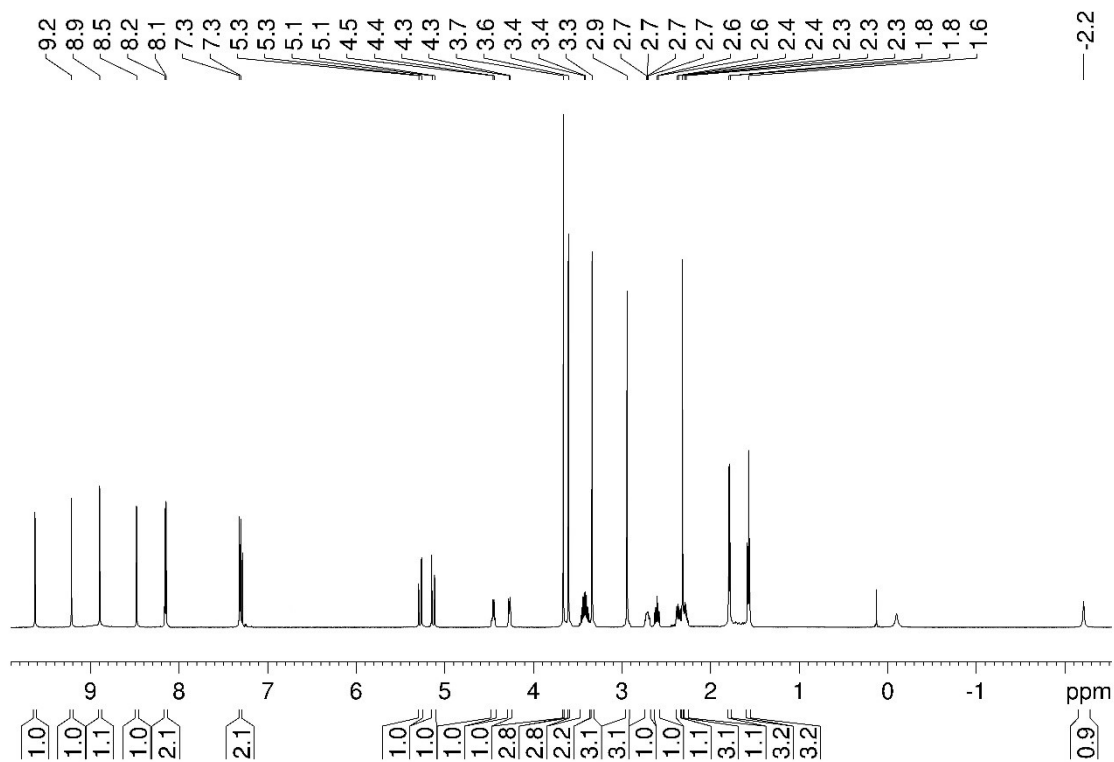

**Figure S18.**  $^1\text{H}$  NMR spectrum of the N-tosylhydrazone of methyl pyropheophorbide-*d* (**3**) in  $\text{CDCl}_3$ .

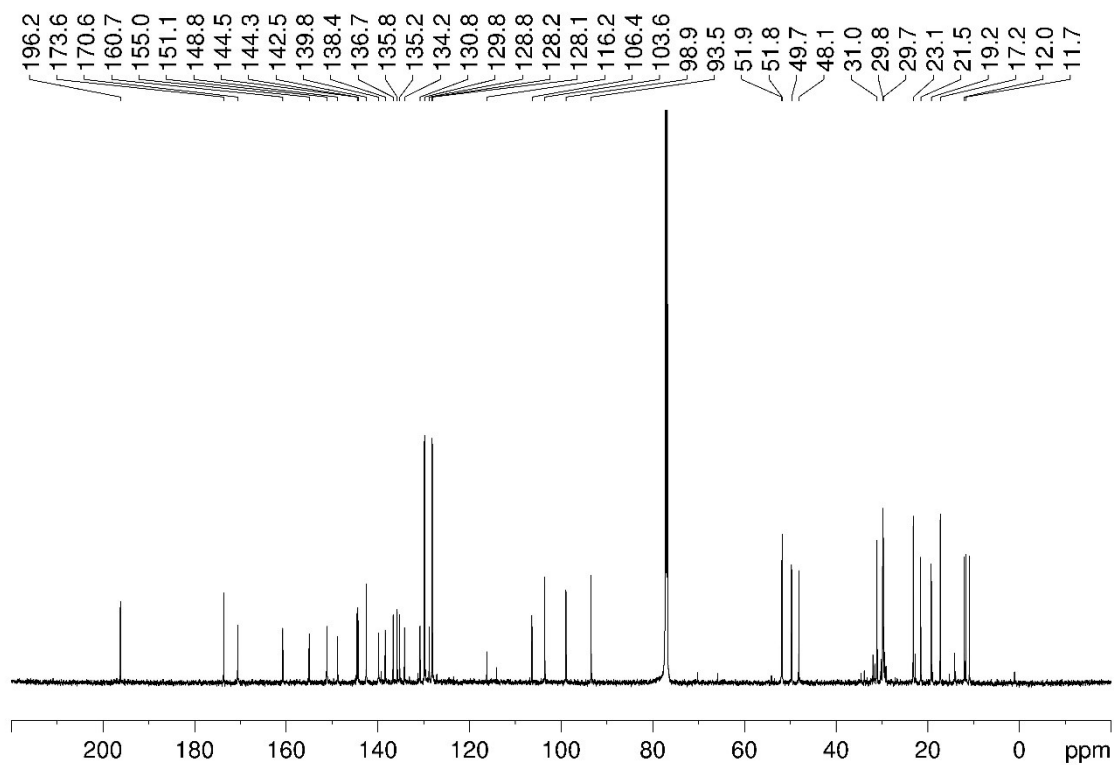

**Figure S19.**  $^{13}\text{C}$  NMR spectrum of the N-tosylhydrazone of methyl pyropheophorbide-*d* (**3**) in  $\text{CDCl}_3$ .



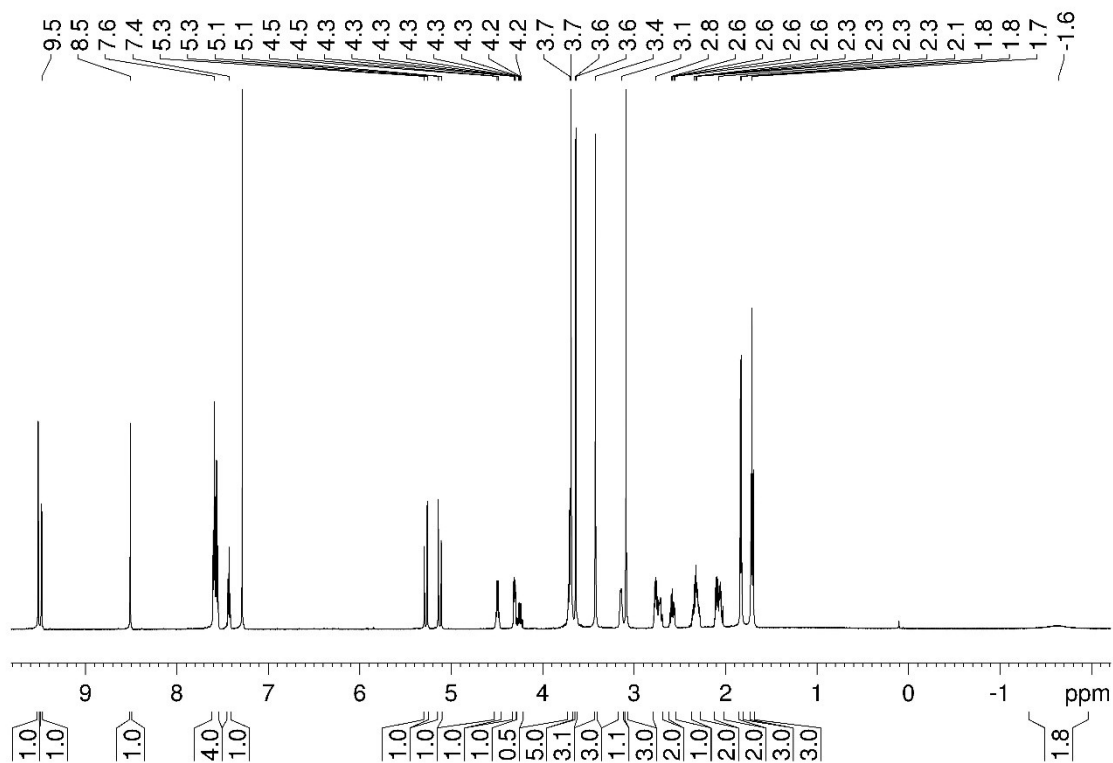

**Figure S20.**  $^1\text{H}$  NMR spectrum of the cyclopropane conjugate with methyl pyropheophorbide-d (**9a**) in  $\text{CDCl}_3$ .

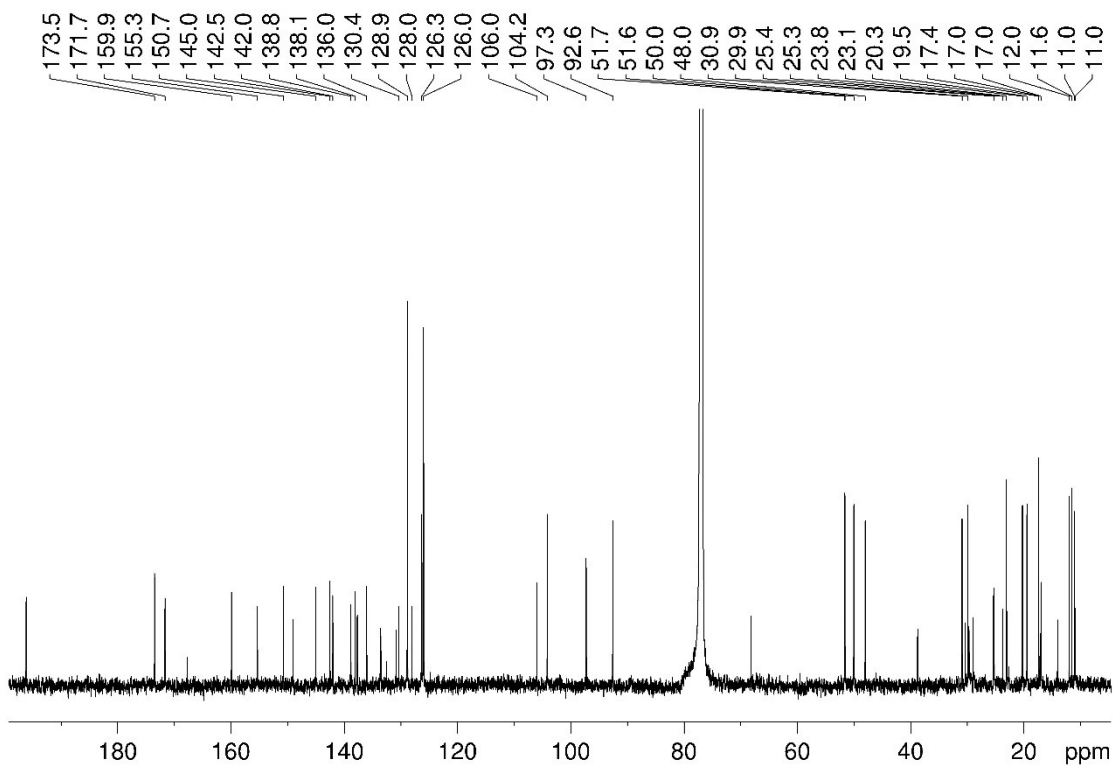

**Figure S21.**  $^{13}\text{C}$  NMR spectrum of the cyclopropane conjugate with methyl pyropheophorbide-d (**9a**) in  $\text{CDCl}_3$ .

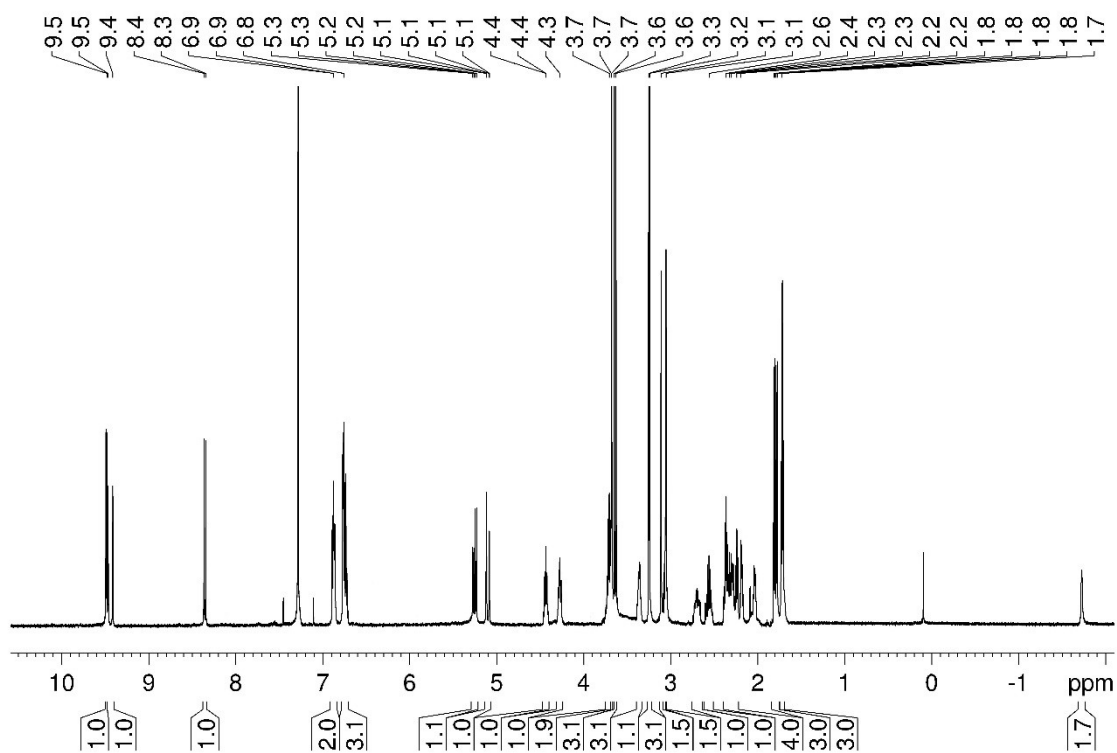

Figure S22.  $^1\text{H}$  NMR spectrum of the cyclopropane conjugate with methyl pyropheophorbide-*d* (**9b**) in  $\text{CDCl}_3$ .

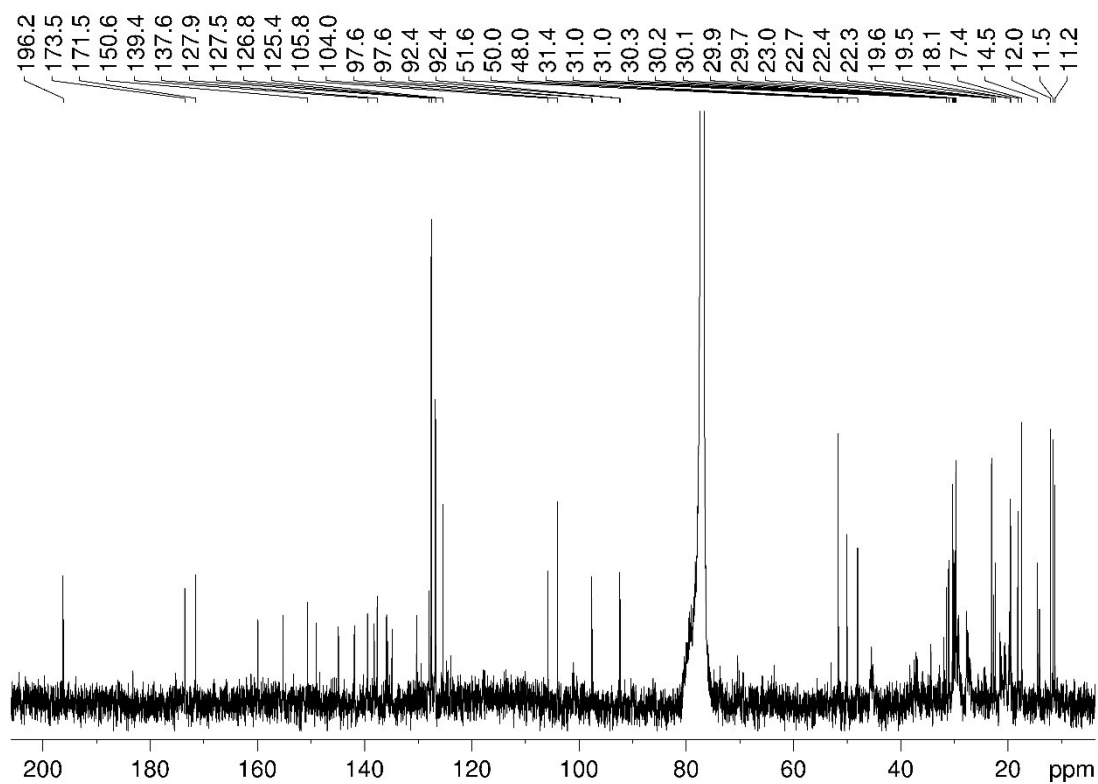

Figure S23.  $^{13}\text{C}$  NMR spectrum of the cyclopropane conjugate with methyl pyropheophorbide-*d* (**9b**) in  $\text{CDCl}_3$ .

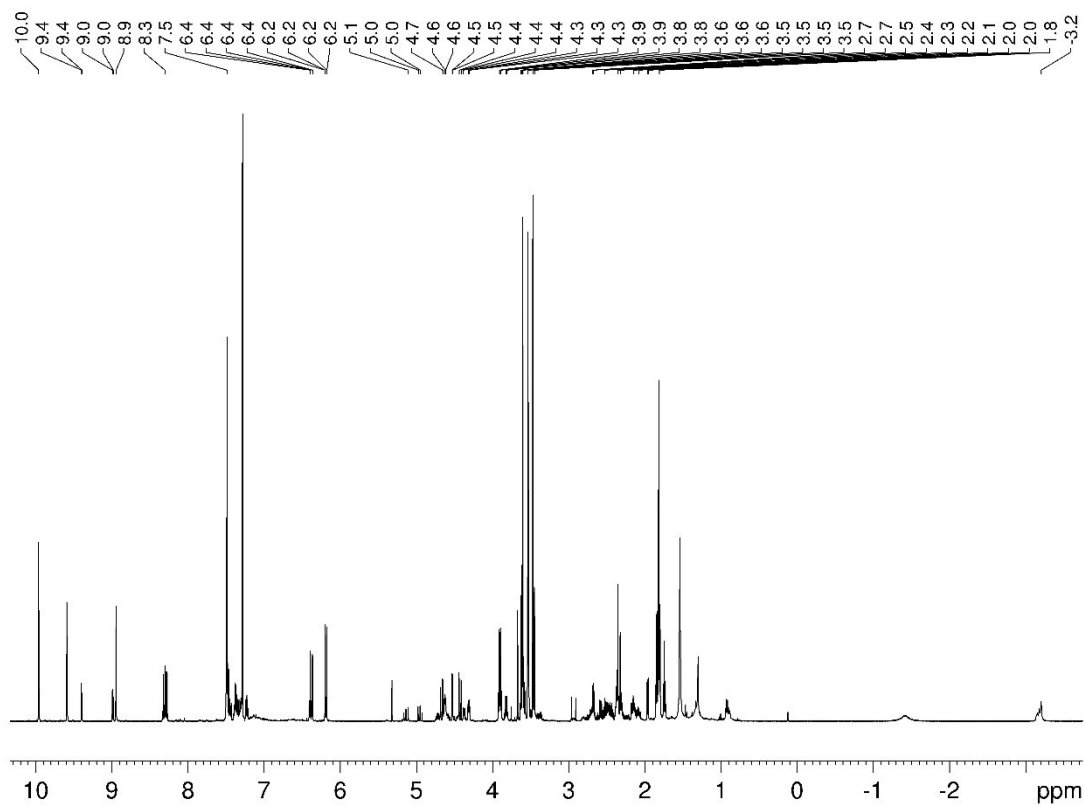

**Figure S24.**  $^1\text{H}$  NMR spectrum of the cyclopropane conjugate with methyl pyropheophorbide-*a* (**10**) in  $\text{CDCl}_3$ .

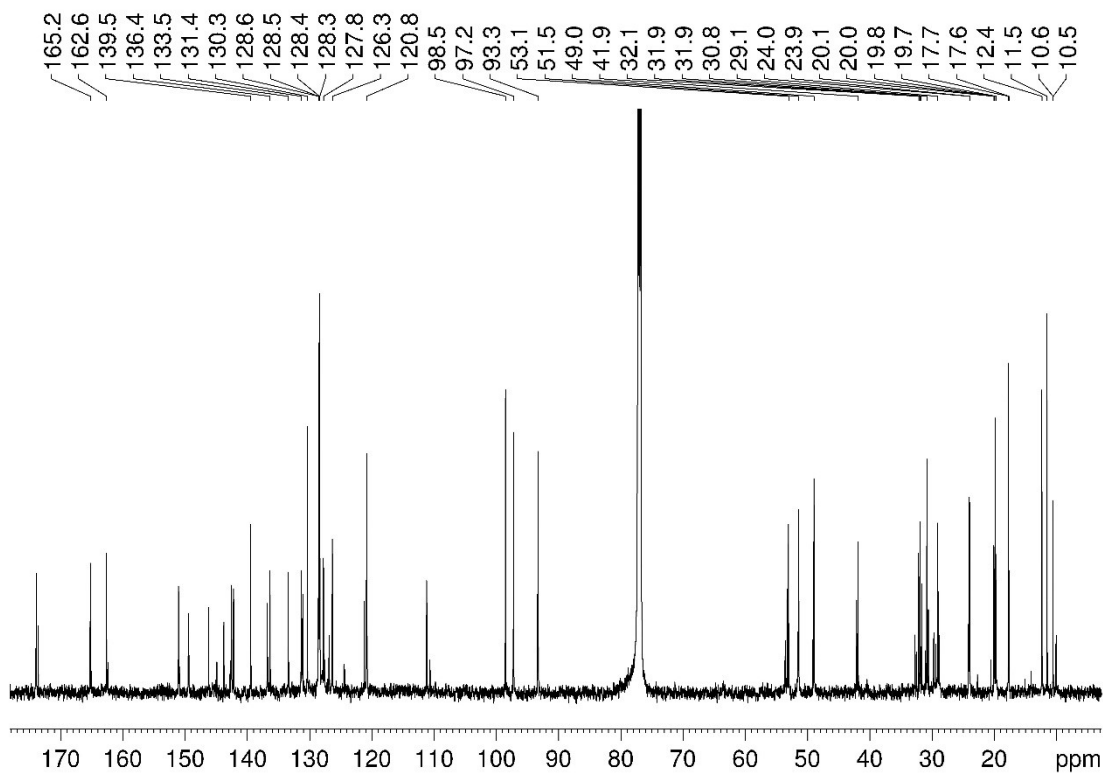

**Figure S25.**  $^{13}\text{C}$  NMR spectrum of the cyclopropane conjugate with methyl pyropheophorbide-*a* (**10**) in  $\text{CDCl}_3$ .

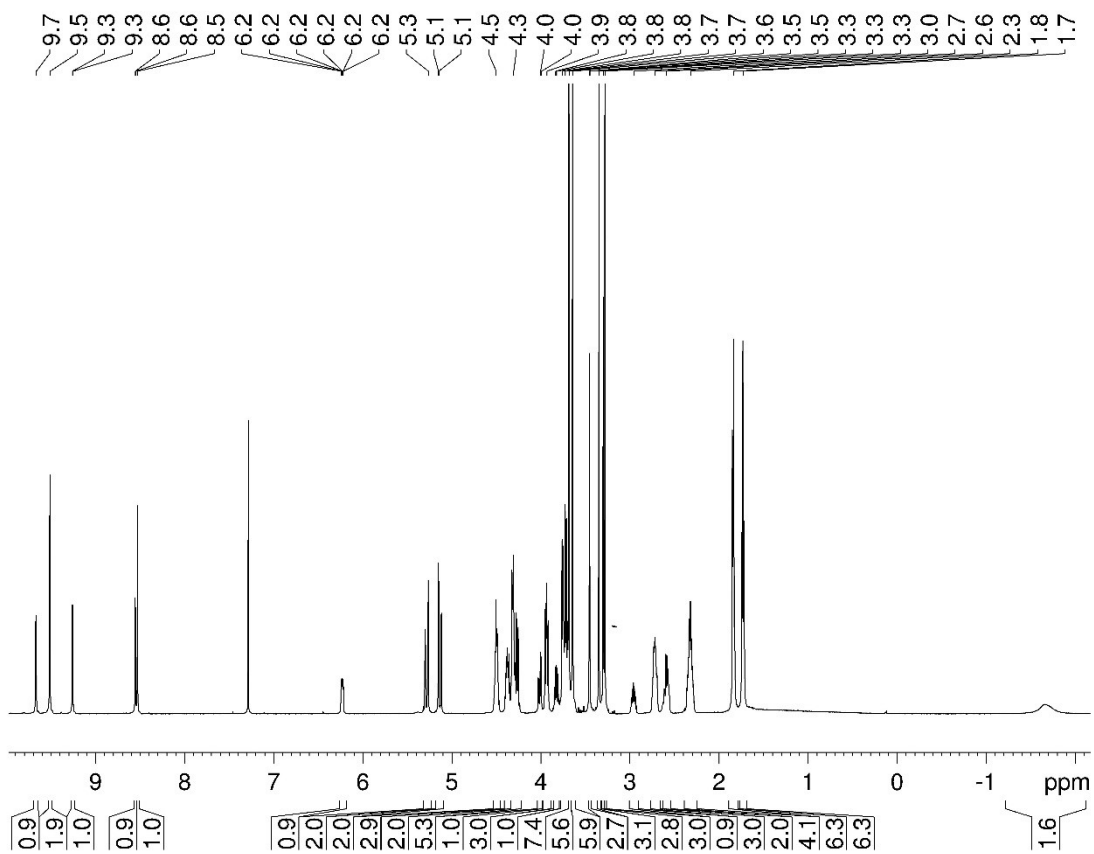

**Figure S26.** <sup>1</sup>H NMR spectrum of the dioxane conjugate with methyl pyropheophorbide-*d* (**11**) in CDCl<sub>3</sub>.

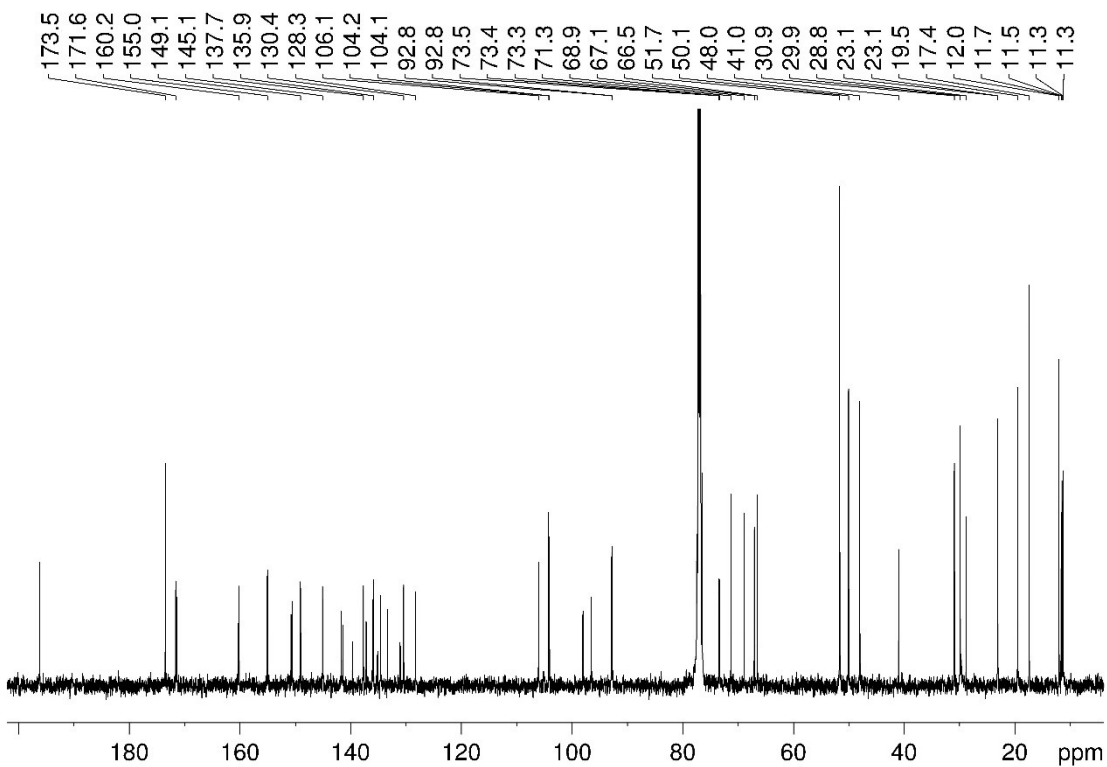

**Figure S27.** <sup>13</sup>C NMR spectrum of the dioxane conjugate with methyl pyropheophorbide-*d* (**11**) in CDCl<sub>3</sub>.

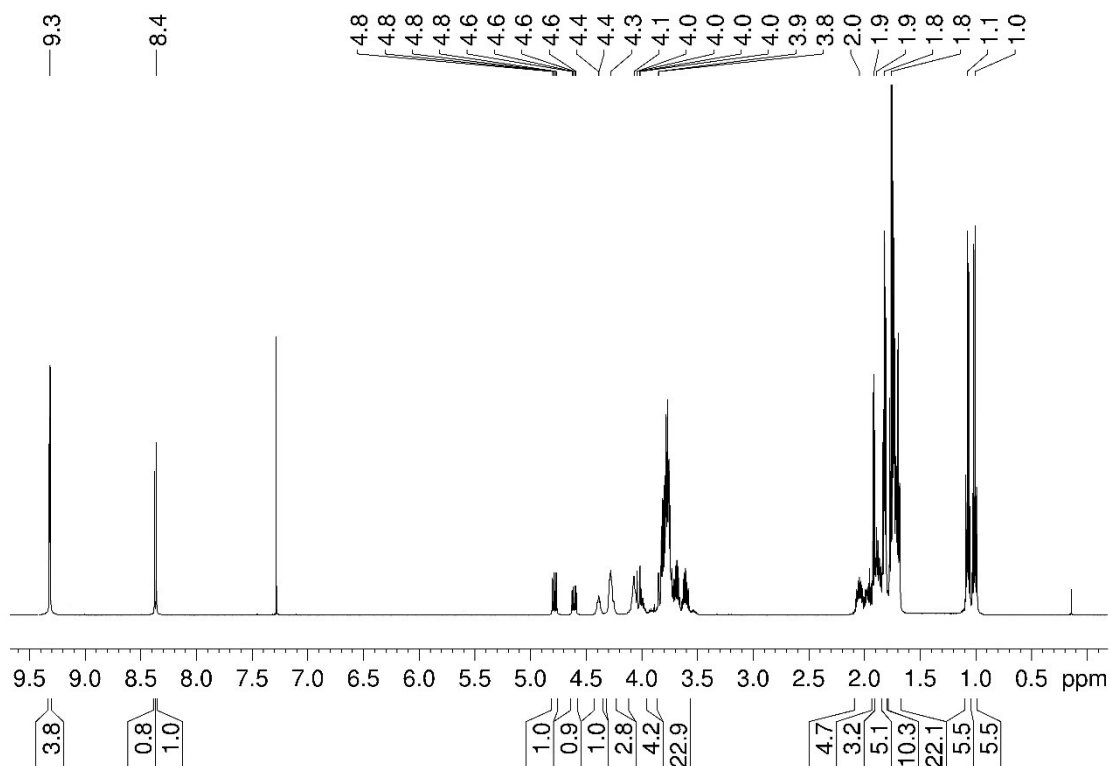

**Figure S28.**  $^1\text{H}$  NMR spectrum of the Ni(II) 3,5-(1-methylethylene)-2,7,8,12,13,17,18-heptaethyl-17,18-*trans*-dihydroporphyrin (**13**) in  $\text{CDCl}_3$ .

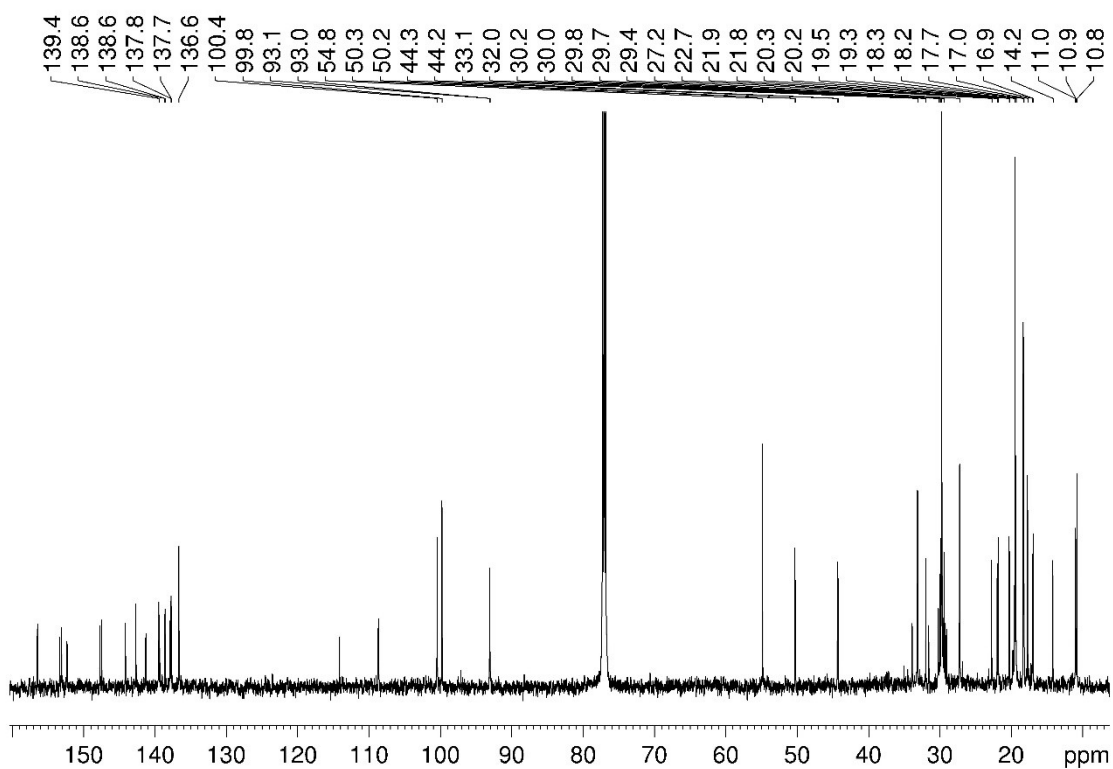

**Figure S29.**  $^{13}\text{C}$  NMR spectrum of the Ni(II) 3,5-(1-methylethylene)-2,7,8,12,13,17,18-heptaethyl-17,18-*trans*-dihydroporphyrin (**13**) in  $\text{CDCl}_3$ .

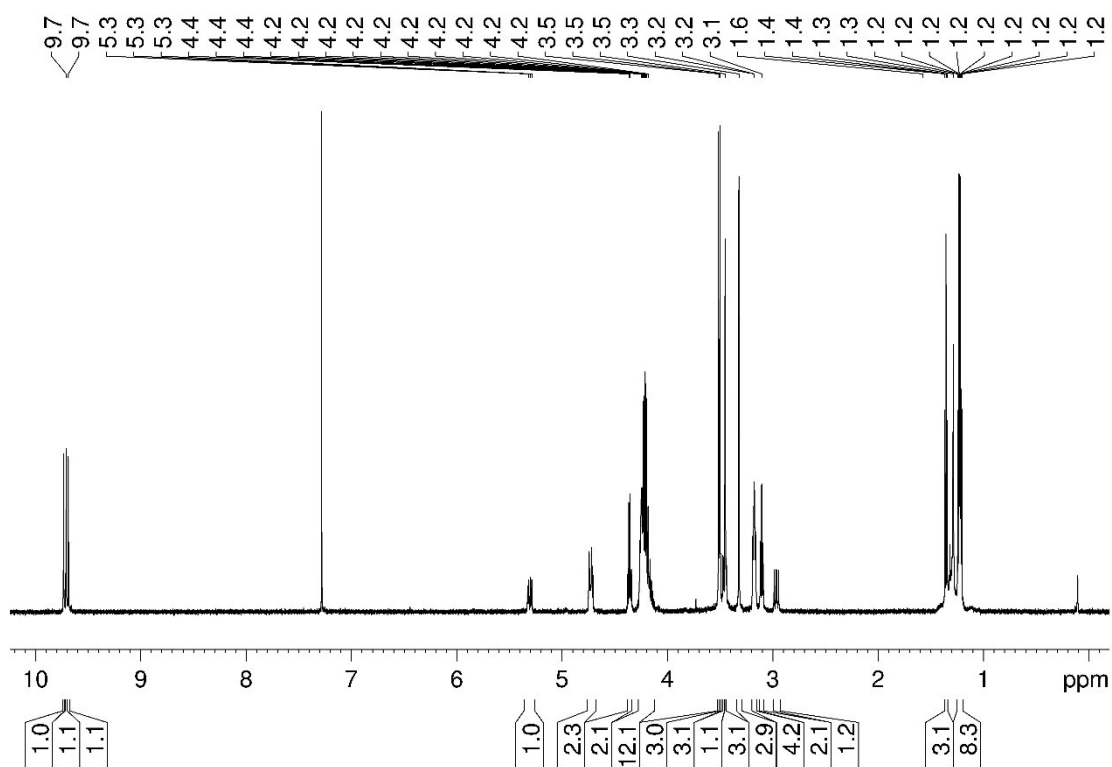

**Figure S30.**  $^1\text{H}$  NMR spectrum of the Ni(II) 5,7-(2-((ethoxycarbonyl)methyl)ethylene)-3,8,13,18-tetramethyl-2,12,17-tri(2-(ethoxycarbonyl)ethyl)porphyrin (**14**) in  $\text{CDCl}_3$ .

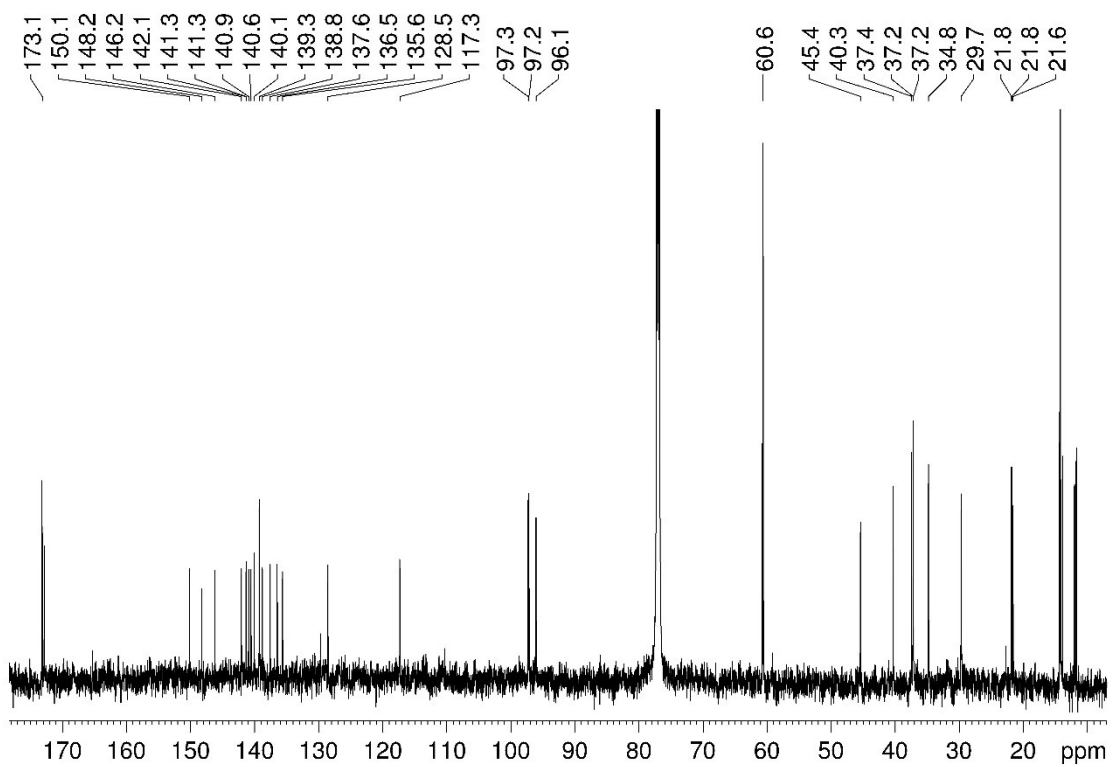

**Figure S31.**  $^{13}\text{C}$  NMR spectrum of the Ni(II) 5,7-(2-((ethoxycarbonyl)methyl)ethylene)-3,8,13,18-tetramethyl-2,12,17-tri(2-(ethoxycarbonyl)ethyl)porphyrin (**14**) in  $\text{CDCl}_3$ .

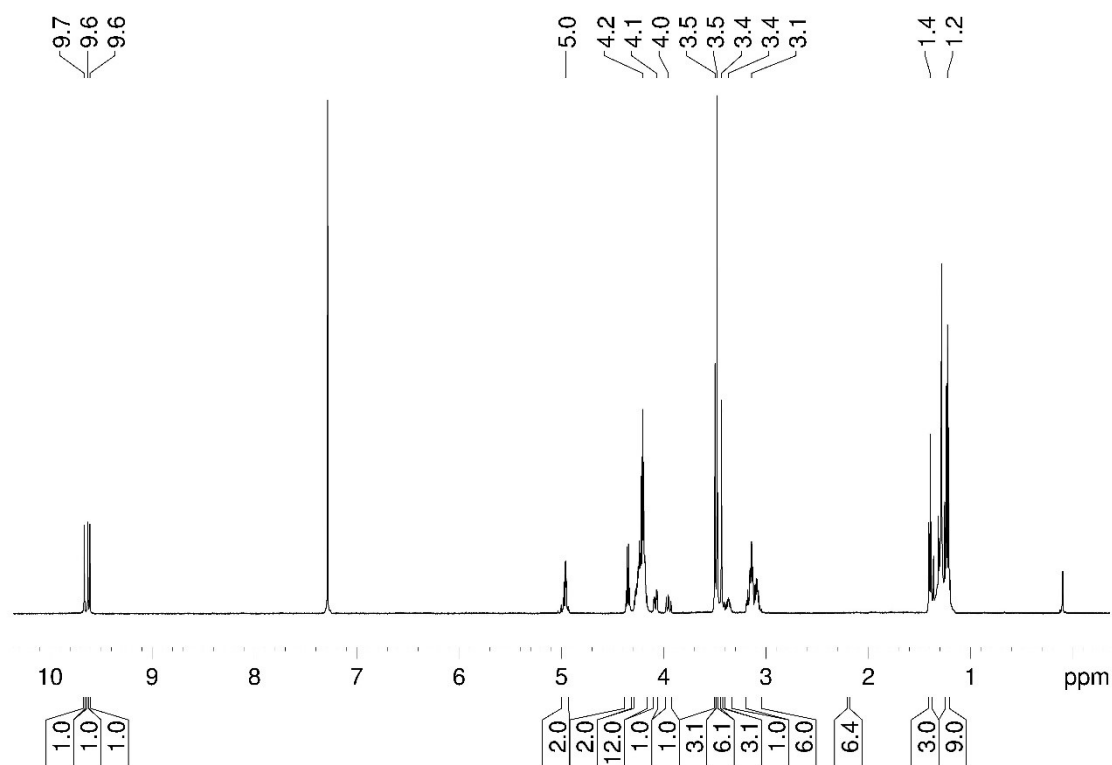

**Figure S32.**  $^1\text{H}$  NMR spectrum of the Ni(II) 5,7-(2-(ethoxycarbonyl)-1,3-propylene)-3,8,13,18-tetramethyl-2,12,17-tri(2-(ethoxycarbonyl)ethyl)porphyrin (**15**) in  $\text{CDCl}_3$ .

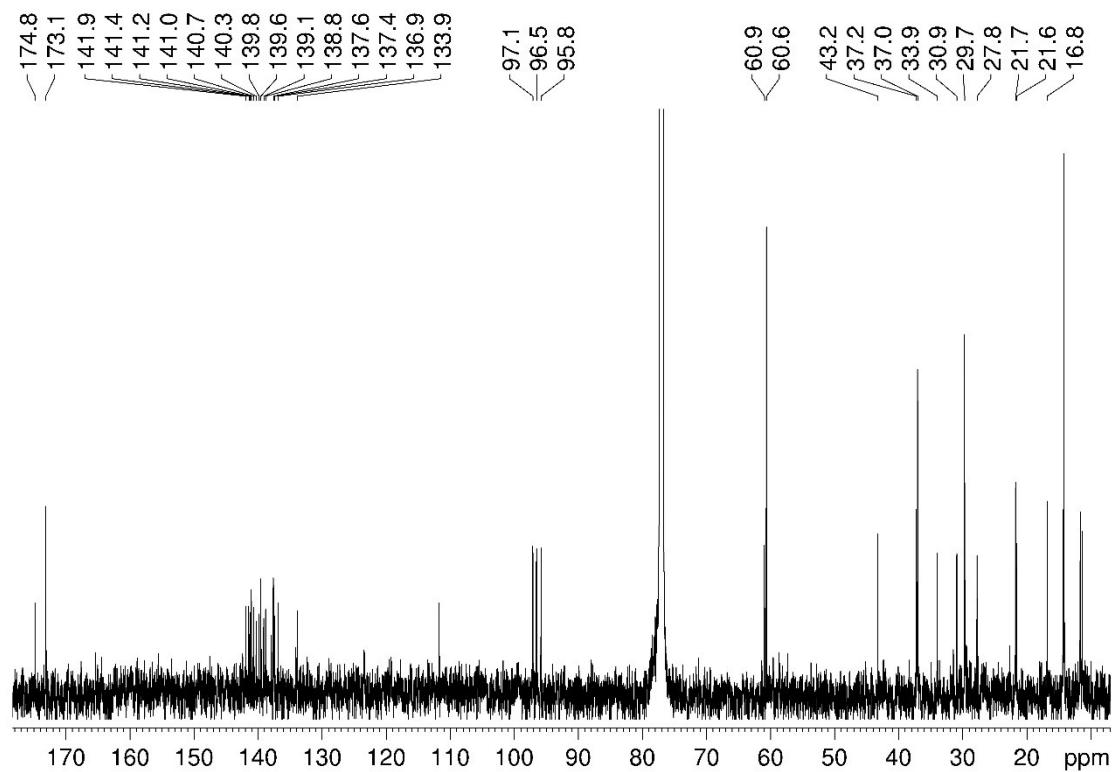

**Figure S33.**  $^{13}\text{C}$  NMR spectrum of the Ni(II) 5,7-(2-(ethoxycarbonyl)-1,3-propylene)-3,8,13,18-tetramethyl-2,12,17-tri(2-(ethoxycarbonyl)ethyl)porphyrin (**15**) in  $\text{CDCl}_3$ .



UV-Vis absorption spectra.

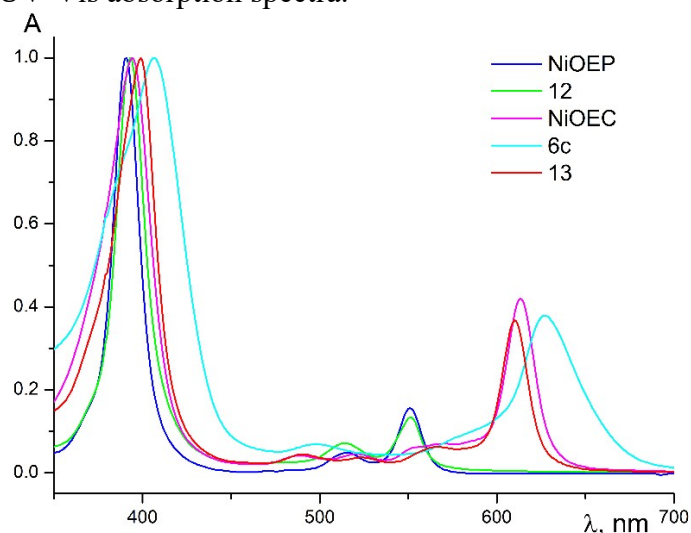

**Figure S34.** Normalized UV-Vis absorption spectra of nickel  $\beta$ -octaalkylporphyrin (NiOEP), nickel  $\beta$ -octaalkylchlorin (NiOEC), its tosylhydrazone **2c** and products with annulated cycles **12**, **13** recorded in  $\text{CH}_2\text{Cl}_2$  at concentration  $10^{-5}$  M.

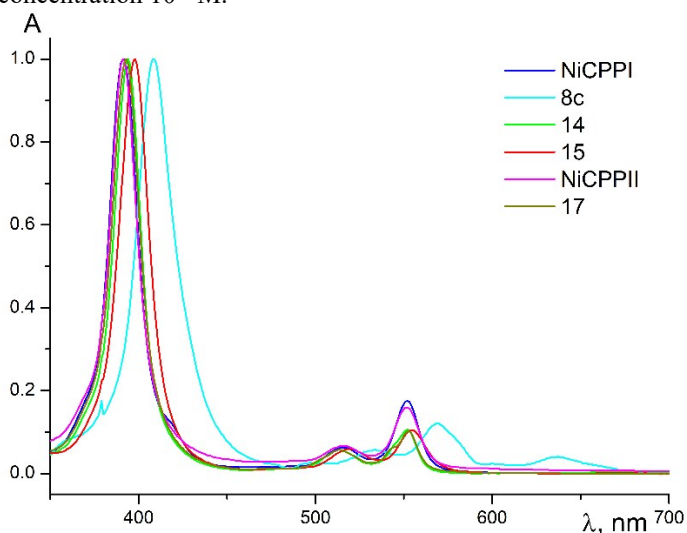

**Figure S35.** Normalized UV-Vis absorption spectra of the nickel coproporphyrin I (NiCPPI), nickel coproporphyrin II (NiCPPII), tosylhydrazone **4c** and products with annulated cycles **14**, **15**, **17** recorded in  $\text{CH}_2\text{Cl}_2$  at concentration  $10^{-5}$  M.

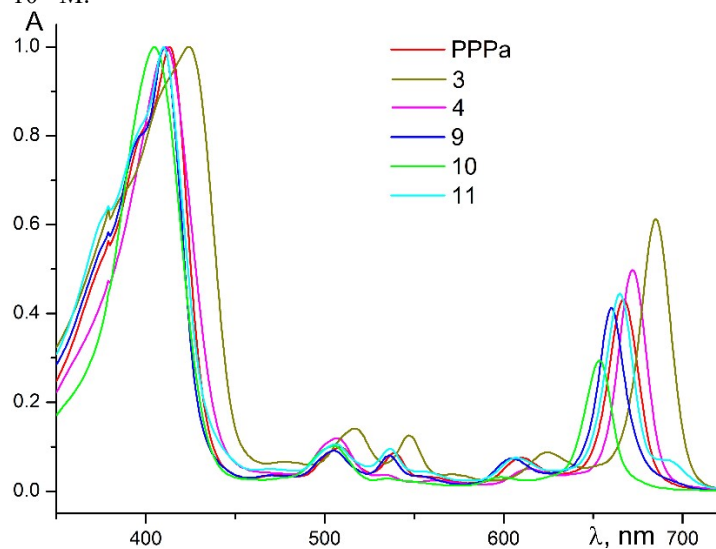

**Figure S36.** Normalized UV-Vis absorption spectra of the pyropheophorbide-*a* (PPPa), tosylhydrazones **6**, **8** and conjugates **9-11** recorded in  $\text{CH}_2\text{Cl}_2$  at concentration  $10^{-5}$  M.

## DFT calculations of the reaction intermediates

Computed geometry and energy data of **5d**.

Electronic energy E = -1934.315154 a.u. Free Energy G = -1933.648384 a.u. Entropy S = 259.257 kcal/mol•K

Table S5. Atom coordinates of **5d**.

|   |          |          |          |
|---|----------|----------|----------|
| N | -1.45439 | 1.183635 | 0.069856 |
| N | -1.124   | -1.5846  | 0.015137 |
| C | -1.48481 | 2.505001 | -0.34175 |
| C | -2.73568 | 0.871298 | 0.41078  |
| C | -0.77566 | -2.89892 | -0.4476  |
| C | -2.41389 | -1.58377 | 0.264474 |
| C | -0.33157 | 3.273971 | -0.54623 |
| C | -2.82022 | 2.996696 | -0.32078 |
| C | -3.07505 | -0.45246 | 0.919069 |
| C | -3.61791 | 1.962407 | 0.175047 |
| C | 0.571708 | -3.30776 | -0.55398 |
| C | -1.90303 | -3.67952 | -0.58647 |
| C | -3.02574 | -2.86604 | -0.16021 |
| C | 0.953467 | 2.851466 | -0.29621 |
| H | -0.4722  | 4.312537 | -0.82744 |
| C | -3.25641 | 4.392212 | -0.68074 |
| C | -3.88776 | -0.67793 | 1.974806 |
| C | -5.12257 | 1.985536 | 0.287091 |
| C | 1.661202 | -2.54541 | -0.21939 |
| H | 0.7434   | -4.34894 | -0.80023 |
| C | -1.96313 | -5.10934 | -1.03898 |
| C | -4.33578 | -3.2225  | -0.29482 |
| C | 2.12245  | 3.701295 | -0.25214 |
| N | 1.301558 | 1.547901 | 0.044515 |
| C | -3.23975 | 5.367736 | 0.513334 |
| H | -4.27011 | 4.363941 | -1.09935 |
| H | -2.61778 | 4.791973 | -1.47868 |
| C | -5.83208 | 1.677773 | -1.0467  |
| H | -5.46813 | 1.271056 | 1.039672 |
| H | -5.44765 | 2.972137 | 0.642027 |
| C | 3.018421 | -3.07813 | -0.08931 |
| N | 1.653944 | -1.19278 | 0.078102 |
| C | -2.04171 | -6.12313 | 0.120652 |
| H | -2.82863 | -5.25447 | -1.70045 |
| H | -1.08514 | -5.33448 | -1.65521 |
| C | -5.6109  | -2.4801  | -0.06352 |
| H | -4.48964 | -4.22611 | -0.69232 |
| C | 2.138079 | 5.180854 | -0.52588 |
| C | 3.169239 | 2.909584 | 0.154145 |
| C | 2.639517 | 1.568117 | 0.29796  |
| H | -2.23224 | 5.45343  | 0.935713 |
| H | -3.90344 | 5.020225 | 1.313081 |
| H | -3.56883 | 6.368428 | 0.20802  |
| H | -6.92227 | 1.717526 | -0.93126 |
| H | -5.56358 | 0.679213 | -1.41038 |
| H | -5.54632 | 2.396144 | -1.82302 |

|    |          |          |          |
|----|----------|----------|----------|
| C  | 3.40771  | -4.51546 | -0.3015  |
| C  | 3.808948 | -2.04358 | 0.31152  |
| C  | 2.954375 | -0.85652 | 0.365949 |
| H  | -2.92825 | -5.94838 | 0.740466 |
| H  | -2.09115 | -7.14945 | -0.2615  |
| H  | -1.16248 | -6.04139 | 0.769093 |
| H  | -6.27294 | -2.63113 | -0.9263  |
| H  | -6.14615 | -2.89519 | 0.803149 |
| H  | -5.47399 | -1.4133  | 0.106551 |
| C  | 1.772519 | 6.034529 | 0.704852 |
| H  | 3.133842 | 5.47379  | -0.87987 |
| H  | 1.447738 | 5.417037 | -1.3456  |
| C  | 4.608611 | 3.304552 | 0.347906 |
| C  | 3.418584 | 0.428104 | 0.553106 |
| C  | 3.122342 | -5.41463 | 0.918139 |
| H  | 2.883015 | -4.91837 | -1.17754 |
| H  | 4.47585  | -4.56953 | -0.54239 |
| C  | 5.290052 | -2.0536  | 0.573843 |
| H  | 1.796705 | 7.102893 | 0.459637 |
| H  | 0.768843 | 5.789486 | 1.069096 |
| H  | 2.475083 | 5.856892 | 1.526664 |
| C  | 5.483198 | 3.077611 | -0.90119 |
| H  | 5.03758  | 2.75055  | 1.193042 |
| H  | 4.660123 | 4.363203 | 0.630255 |
| H  | 4.471235 | 0.569594 | 0.76476  |
| H  | 2.058159 | -5.40245 | 1.177046 |
| H  | 3.41347  | -6.45162 | 0.713799 |
| H  | 3.680706 | -5.07002 | 1.795604 |
| C  | 6.133329 | -1.68406 | -0.66303 |
| H  | 5.589725 | -3.0481  | 0.925398 |
| H  | 5.526141 | -1.36179 | 1.392176 |
| H  | 5.473991 | 2.024354 | -1.2027  |
| H  | 6.522852 | 3.369395 | -0.71023 |
| H  | 5.113744 | 3.666232 | -1.74845 |
| H  | 7.202538 | -1.69156 | -0.42119 |
| H  | 5.873504 | -0.68687 | -1.03396 |
| H  | 5.962681 | -2.39549 | -1.47864 |
| H  | -4.31192 | 0.140731 | 2.545522 |
| Ni | 0.112922 | -5.5E-05 | 0.080625 |
| H  | -4.11041 | -1.68511 | 2.311567 |

Computed geometry and energy data of **5e**.

Electronic energy E = -1824.762293 a.u. Free Energy G = -1824.107852 a.u. Entropy S = 253.178 kcal/mol•K

Table S6. Atom coordinates of **5e**.

|   |          |          |          |
|---|----------|----------|----------|
| N | -1.3124  | -1.38939 | -0.1375  |
| N | -1.30686 | 1.393535 | -0.06538 |
| C | -1.16072 | -2.70434 | 0.281655 |
| C | -2.64328 | -1.21203 | -0.31977 |
| C | -1.13824 | 2.72392  | 0.306166 |
| C | -2.60194 | 1.283586 | -0.43473 |

|   |          |          |          |
|---|----------|----------|----------|
| C | 0.065758 | -3.33677 | 0.405516 |
| C | -2.44718 | -3.32849 | 0.427586 |
| C | -3.18126 | 0.02607  | -0.88383 |
| C | -3.38857 | -2.39082 | 0.039496 |
| C | 0.092383 | 3.313172 | 0.532836 |
| C | -2.39177 | 3.426839 | 0.216496 |
| C | -3.30917 | 2.523464 | -0.28564 |
| C | 1.295051 | -2.7466  | 0.127298 |
| H | 0.063068 | -4.38976 | 0.665238 |
| C | -2.68863 | -4.74849 | 0.863314 |
| C | -4.09014 | -0.06066 | -1.86914 |
| C | -4.8847  | -2.54689 | 0.156209 |
| C | 1.326753 | 2.702504 | 0.3257   |
| H | 0.098277 | 4.365636 | 0.795501 |
| C | -2.61088 | 4.882854 | 0.525315 |
| C | -4.76873 | 2.748819 | -0.57186 |
| C | 2.548824 | -3.4608  | 0.007814 |
| N | 1.475685 | -1.40401 | -0.09923 |
| C | -2.6808  | -5.75381 | -0.30625 |
| H | -3.65352 | -4.81274 | 1.379968 |
| H | -1.93441 | -5.04836 | 1.60149  |
| C | -5.40362 | -2.22716 | 1.57244  |
| H | -5.40386 | -1.90079 | -0.55506 |
| H | -5.16567 | -3.57448 | -0.10628 |
| C | 2.595403 | 3.392871 | 0.320939 |
| N | 1.492017 | 1.376073 | -0.0012  |
| C | -2.36247 | 5.810898 | -0.68092 |
| H | -3.63974 | 5.025751 | 0.87749  |
| H | -1.96497 | 5.191168 | 1.356979 |
| C | -5.69407 | 2.336286 | 0.588753 |
| H | -5.05253 | 2.18898  | -1.47297 |
| H | -4.9341  | 3.807992 | -0.80457 |
| C | 2.726551 | -4.94725 | 0.159089 |
| C | 3.497972 | -2.52522 | -0.3239  |
| C | 2.818013 | -1.24492 | -0.34778 |
| H | -1.71835 | -5.74247 | -0.82983 |
| H | -3.45801 | -5.50868 | -1.03854 |
| H | -2.86119 | -6.77305 | 0.054945 |
| H | -6.49    | -2.36477 | 1.62931  |
| H | -5.17703 | -1.18999 | 1.844314 |
| H | -4.93805 | -2.87507 | 2.323393 |
| C | 2.802027 | 4.856965 | 0.602173 |
| C | 3.539999 | 2.465288 | -0.05407 |
| C | 2.836477 | 1.212444 | -0.22032 |
| H | -3.0284  | 5.558179 | -1.51322 |
| H | -2.53812 | 6.858209 | -0.40864 |
| H | -1.3324  | 5.720083 | -1.04305 |
| H | -5.46041 | 2.901842 | 1.498005 |
| H | -6.74491 | 2.518597 | 0.334242 |
| H | -5.58079 | 1.271492 | 0.820083 |

|    |          |          |          |
|----|----------|----------|----------|
| C  | 2.369055 | -5.74004 | -1.11381 |
| H  | 3.766325 | -5.16119 | 0.433164 |
| H  | 2.116727 | -5.31417 | 0.99496  |
| C  | 4.971164 | -2.73823 | -0.54406 |
| C  | 3.451125 | -0.01467 | -0.46814 |
| C  | 2.601382 | 5.753229 | -0.63611 |
| H  | 2.123428 | 5.185753 | 1.399452 |
| H  | 3.815115 | 5.010413 | 0.992704 |
| C  | 5.024916 | 2.663977 | -0.19593 |
| H  | 2.512753 | -6.81526 | -0.9559  |
| H  | 1.325445 | -5.5735  | -1.40257 |
| H  | 2.998418 | -5.43141 | -1.95588 |
| C  | 5.81526  | -2.56282 | 0.734229 |
| H  | 5.337034 | -2.04925 | -1.31584 |
| H  | 5.134908 | -3.74633 | -0.94335 |
| H  | 4.518646 | -0.01312 | -0.65564 |
| H  | 1.587637 | 5.649733 | -1.03866 |
| H  | 2.762927 | 6.807787 | -0.38402 |
| H  | 3.302143 | 5.481576 | -1.4333  |
| C  | 5.815273 | 2.330612 | 1.08513  |
| H  | 5.225144 | 3.704899 | -0.47694 |
| H  | 5.407058 | 2.053916 | -1.02446 |
| H  | 5.698581 | -1.55587 | 1.149884 |
| H  | 6.878881 | -2.7242  | 0.523589 |
| H  | 5.508111 | -3.27658 | 1.506638 |
| H  | 6.889466 | 2.487778 | 0.932647 |
| H  | 5.66183  | 1.287669 | 1.383772 |
| H  | 5.492811 | 2.963556 | 1.919344 |
| H  | -4.66781 | -0.90231 | -2.23565 |
| Ni | 0.092757 | -0.00407 | -0.10111 |

Computed geometry and energy data of **5f**.

Electronic energy E = -1824.767137 a.u. Free Energy G = -1824.112562 a.u. Entropy S = 254.066 kcal/mol•K

Table S7. Atom coordinates of **5f**.

|   |          |          |          |
|---|----------|----------|----------|
| N | 0        | 0        | 0        |
| N | 0        | 0        | 2.766031 |
| C | 0.425479 | 0        | -1.31862 |
| C | -0.81496 | -1.08316 | 0.125409 |
| C | 0.38728  | 0.006415 | 4.097659 |
| C | -0.84032 | -1.05941 | 2.632671 |
| C | 1.095923 | 1.049567 | -1.92998 |
| C | -0.08358 | -1.15271 | -2.00756 |
| C | -1.47358 | -1.42543 | 1.378039 |
| C | -0.8926  | -1.82437 | -1.11043 |
| C | 1.078194 | 1.039645 | 4.710682 |
| C | -0.18438 | -1.1176  | 4.789024 |
| C | -0.98806 | -1.77133 | 3.87772  |
| C | 1.385985 | 2.267842 | -1.33356 |
| H | 1.325724 | 0.944213 | -2.98436 |
| C | 0.181791 | -1.49236 | -3.44984 |

|   |          |          |          |
|---|----------|----------|----------|
| C | -2.65555 | -2.08366 | 1.398395 |
| C | -1.60437 | -3.1245  | -1.39422 |
| C | 1.39918  | 2.250405 | 4.111969 |
| H | 1.295635 | 0.932956 | 5.767675 |
| C | 0.007121 | -1.4447  | 6.245519 |
| C | -1.77608 | -3.02939 | 4.133968 |
| C | 1.849876 | 3.444146 | -2.03795 |
| N | 1.210607 | 2.536394 | 0.003865 |
| C | -0.85183 | -0.89107 | -4.42294 |
| H | 0.195872 | -2.5819  | -3.57335 |
| H | 1.184964 | -1.15139 | -3.73331 |
| C | -0.97935 | -4.34753 | -0.69753 |
| H | -2.66738 | -3.06167 | -1.13608 |
| H | -1.58575 | -3.29414 | -2.4767  |
| C | 1.885781 | 3.416553 | 4.81756  |
| N | 1.218318 | 2.52686  | 2.776952 |
| C | -1.01084 | -0.74725 | 7.170317 |
| H | -0.06956 | -2.52939 | 6.386765 |
| H | 1.023294 | -1.17519 | 6.559335 |
| C | -0.98613 | -4.31621 | 3.829258 |
| H | -2.69718 | -3.02459 | 3.539305 |
| H | -2.09388 | -3.04432 | 5.183906 |
| C | 2.118878 | 3.53128  | -3.5159  |
| C | 1.924975 | 4.448777 | -1.10498 |
| C | 1.55798  | 3.854579 | 0.165115 |
| H | -0.87161 | 0.202092 | -4.35011 |
| H | -1.86038 | -1.2551  | -4.19783 |
| H | -0.61496 | -1.16044 | -5.45891 |
| H | -1.515   | -5.26455 | -0.97008 |
| H | -1.01389 | -4.24619 | 0.391492 |
| H | 0.069775 | -4.46528 | -0.99074 |
| C | 2.170813 | 3.493927 | 6.293172 |
| C | 1.96415  | 4.425331 | 3.889175 |
| C | 1.576345 | 3.843338 | 2.619898 |
| H | -2.03601 | -1.03544 | 6.912962 |
| H | -0.83334 | -1.01665 | 8.218084 |
| H | -0.94245 | 0.342658 | 7.081631 |
| H | -0.07813 | -4.37444 | 4.440258 |
| H | -1.59355 | -5.20546 | 4.035517 |
| H | -0.68054 | -4.34952 | 2.778004 |
| C | 0.851932 | 3.790087 | -4.35542 |
| H | 2.842247 | 4.333183 | -3.70529 |
| H | 2.599824 | 2.608185 | -3.86428 |
| C | 2.371402 | 5.871201 | -1.30981 |
| C | 1.662633 | 4.495033 | 1.394958 |
| C | 0.921077 | 3.795374 | 7.144101 |
| H | 2.623796 | 2.55537  | 6.637238 |
| H | 2.922329 | 4.271221 | 6.475871 |
| C | 2.431832 | 5.840387 | 4.097073 |
| H | 1.096609 | 3.846318 | -5.42253 |

|    |          |          |          |
|----|----------|----------|----------|
| H  | 0.115399 | 2.991153 | -4.21543 |
| H  | 0.375984 | 4.732969 | -4.06403 |
| C  | 3.878676 | 6.084226 | -1.06537 |
| H  | 1.80111  | 6.540344 | -0.65301 |
| H  | 2.129518 | 6.182108 | -2.33326 |
| H  | 1.942496 | 5.541995 | 1.397762 |
| H  | 0.155679 | 3.023139 | 7.009406 |
| H  | 1.176781 | 3.841063 | 8.209133 |
| H  | 0.475835 | 4.754868 | 6.858498 |
| C  | 3.937525 | 6.035352 | 3.828806 |
| H  | 2.21109  | 6.146805 | 5.126601 |
| H  | 1.859544 | 6.521775 | 3.454706 |
| H  | 4.15613  | 5.808439 | -0.04201 |
| H  | 4.154526 | 7.133464 | -1.22298 |
| H  | 4.476097 | 5.468311 | -1.7467  |
| H  | 4.23015  | 7.079561 | 3.989521 |
| H  | 4.19367  | 5.763569 | 2.798828 |
| H  | 4.537935 | 5.406141 | 4.495221 |
| H  | -3.3829  | -2.43636 | 0.683729 |
| Ni | 0.591868 | 1.277881 | 1.387237 |

Computed geometry and energy data of **5g**.

Electronic energy E = -1824.801792 a.u. Free Energy G = -1824.147322 a.u. Entropy S = 253.158 kcal/mol•K

Table S8. Atom coordinates of **5g**.

|   |          |          |          |
|---|----------|----------|----------|
| N | -1.49293 | 1.129879 | 0.061553 |
| N | -1.05936 | -1.60237 | -0.007   |
| C | -1.55128 | 2.458966 | -0.33918 |
| C | -2.76342 | 0.779153 | 0.371884 |
| C | -0.67516 | -2.87555 | -0.41781 |
| C | -2.38854 | -1.66603 | 0.247289 |
| C | -0.43813 | 3.26262  | -0.51139 |
| C | -2.91648 | 2.909195 | -0.3514  |
| C | -3.08892 | -0.55222 | 0.869324 |
| C | -3.68398 | 1.856176 | 0.114957 |
| C | 0.646832 | -3.28036 | -0.54295 |
| C | -1.8093  | -3.7346  | -0.5045  |
| C | -2.93438 | -2.97309 | -0.08977 |
| C | 0.873618 | 2.87211  | -0.25027 |
| H | -0.6065  | 4.301195 | -0.77461 |
| C | -3.38112 | 4.290769 | -0.7249  |
| C | -3.94535 | -0.74723 | 1.906716 |
| C | -5.19095 | 1.824659 | 0.179752 |
| C | 1.758089 | -2.4991  | -0.24626 |
| H | 0.825156 | -4.31794 | -0.80277 |
| C | -1.80359 | -5.17392 | -0.92768 |
| C | -4.26242 | -3.44092 | -0.13434 |
| C | 2.003073 | 3.771507 | -0.17197 |
| N | 1.254673 | 1.584638 | 0.04159  |
| C | -3.39768 | 5.271321 | 0.465536 |
| H | -4.38983 | 4.233825 | -1.1507  |

|   |          |          |          |
|---|----------|----------|----------|
| H | -2.74404 | 4.699079 | -1.51934 |
| C | -5.84059 | 1.499292 | -1.18039 |
| H | -5.5342  | 1.090806 | 0.912765 |
| H | -5.56069 | 2.797475 | 0.528095 |
| C | 3.111985 | -2.99348 | -0.13826 |
| N | 1.706417 | -1.15454 | 0.03805  |
| C | -1.78126 | -6.16148 | 0.257768 |
| H | -2.69116 | -5.37413 | -1.54205 |
| H | -0.94243 | -5.37144 | -1.57692 |
| C | -5.53857 | -2.66411 | -0.03282 |
| H | -4.37637 | -4.49886 | -0.358   |
| C | 1.957487 | 5.258563 | -0.39894 |
| C | 3.081235 | 3.00814  | 0.208903 |
| C | 2.602978 | 1.644968 | 0.303338 |
| H | -2.39756 | 5.38213  | 0.899081 |
| H | -4.06371 | 4.913739 | 1.258532 |
| H | -3.74478 | 6.261921 | 0.149129 |
| H | -6.93406 | 1.492696 | -1.0985  |
| H | -5.52012 | 0.515441 | -1.54086 |
| H | -5.56074 | 2.235665 | -1.9419  |
| C | 3.543707 | -4.42005 | -0.34551 |
| C | 3.886071 | -1.92374 | 0.24642  |
| C | 2.998531 | -0.78298 | 0.31595  |
| H | -2.65001 | -6.01334 | 0.908169 |
| H | -1.79357 | -7.19791 | -0.09928 |
| H | -0.88192 | -6.02025 | 0.867628 |
| H | -6.31808 | -3.15199 | -0.63011 |
| H | -5.92677 | -2.60034 | 0.996687 |
| H | -5.43011 | -1.63494 | -0.38759 |
| C | 1.523093 | 6.055933 | 0.846982 |
| H | 2.947251 | 5.606592 | -0.71763 |
| H | 1.278961 | 5.49046  | -1.22995 |
| C | 4.503971 | 3.453556 | 0.413359 |
| C | 3.411394 | 0.533259 | 0.511348 |
| C | 3.347165 | -5.30709 | 0.900106 |
| H | 2.996364 | -4.85866 | -1.18985 |
| H | 4.601228 | -4.43997 | -0.6344  |
| C | 5.372698 | -1.89309 | 0.478106 |
| H | 1.504251 | 7.131253 | 0.634507 |
| H | 0.523048 | 5.755847 | 1.179156 |
| H | 2.213129 | 5.884651 | 1.680636 |
| C | 5.374612 | 3.328624 | -0.85295 |
| H | 4.963843 | 2.876365 | 1.225694 |
| H | 4.511667 | 4.497476 | 0.749178 |
| H | 4.459917 | 0.705318 | 0.725776 |
| H | 2.294282 | -5.33659 | 1.201636 |
| H | 3.675083 | -6.33437 | 0.702587 |
| H | 3.923315 | -4.92199 | 1.748759 |
| C | 6.182749 | -1.50945 | -0.77633 |
| H | 5.70466  | -2.87775 | 0.828674 |



|    |          |          |          |
|----|----------|----------|----------|
| H  | 5.610562 | -1.19308 | 1.289229 |
| H  | 5.413187 | 2.291758 | -1.20485 |
| H  | 6.400475 | 3.660779 | -0.65518 |
| H  | 4.969355 | 3.93878  | -1.66778 |
| H  | 7.25714  | -1.49804 | -0.55854 |
| H  | 5.898043 | -0.51663 | -1.14194 |
| H  | 6.006663 | -2.22323 | -1.58874 |
| H  | -4.41632 | 0.083274 | 2.419826 |
| Ni | 0.109248 | -0.01099 | 0.059946 |
| H  | -4.14404 | -1.74261 | 2.287145 |

Computed geometry and energy data of **5h**.

Electronic energy E = -1824.811496 a.u. Free Energy G = - 1824.153198 a.u. Entropy S = 249.489 kcal/mol•K

Table S9. Atom coordinates of **5h**.

|   |          |          |          |
|---|----------|----------|----------|
| N | -1.49293 | 1.129879 | 0.061553 |
| N | -1.05936 | -1.60237 | -0.007   |
| C | -1.55128 | 2.458966 | -0.33918 |
| C | -2.76342 | 0.779153 | 0.371884 |
| C | -0.67516 | -2.87555 | -0.41781 |
| C | -2.38854 | -1.66603 | 0.247289 |
| C | -0.43813 | 3.26262  | -0.51139 |
| C | -2.91648 | 2.909195 | -0.3514  |
| C | -3.08892 | -0.55222 | 0.869324 |
| C | -3.68398 | 1.856176 | 0.114957 |
| C | 0.646832 | -3.28036 | -0.54295 |
| C | -1.8093  | -3.7346  | -0.5045  |
| C | -2.93438 | -2.97309 | -0.08977 |
| C | 0.873618 | 2.87211  | -0.25027 |
| H | -0.6065  | 4.301195 | -0.77461 |
| C | -3.38112 | 4.290769 | -0.7249  |
| C | -3.94535 | -0.74723 | 1.906716 |
| C | -5.19095 | 1.824659 | 0.179752 |
| C | 1.758089 | -2.4991  | -0.24626 |
| H | 0.825156 | -4.31794 | -0.80277 |
| C | -1.80359 | -5.17392 | -0.92768 |
| C | -4.26242 | -3.44092 | -0.13434 |
| C | 2.003073 | 3.771507 | -0.17197 |
| N | 1.254673 | 1.584638 | 0.04159  |
| C | -3.39768 | 5.271321 | 0.465536 |
| H | -4.38983 | 4.233825 | -1.1507  |
| H | -2.74404 | 4.699079 | -1.51934 |
| C | -5.84059 | 1.499292 | -1.18039 |
| H | -5.5342  | 1.090806 | 0.912765 |
| H | -5.56069 | 2.797475 | 0.528095 |
| C | 3.111985 | -2.99348 | -0.13826 |
| N | 1.706417 | -1.15454 | 0.03805  |
| C | -1.78126 | -6.16148 | 0.257768 |
| H | -2.69116 | -5.37413 | -1.54205 |
| H | -0.94243 | -5.37144 | -1.57692 |
| C | -5.53857 | -2.66411 | -0.03282 |

|    |          |          |          |
|----|----------|----------|----------|
| H  | -4.37637 | -4.49886 | -0.358   |
| C  | 1.957487 | 5.258563 | -0.39894 |
| C  | 3.081235 | 3.00814  | 0.208903 |
| C  | 2.602978 | 1.644968 | 0.303338 |
| H  | -2.39756 | 5.38213  | 0.899081 |
| H  | -4.06371 | 4.913739 | 1.258532 |
| H  | -3.74478 | 6.261921 | 0.149129 |
| H  | -6.93406 | 1.492696 | -1.0985  |
| H  | -5.52012 | 0.515441 | -1.54086 |
| H  | -5.56074 | 2.235665 | -1.9419  |
| C  | 3.543707 | -4.42005 | -0.34551 |
| C  | 3.886071 | -1.92374 | 0.24642  |
| C  | 2.998531 | -0.78298 | 0.31595  |
| H  | -2.65001 | -6.01334 | 0.908169 |
| H  | -1.79357 | -7.19791 | -0.09928 |
| H  | -0.88192 | -6.02025 | 0.867628 |
| H  | -6.31808 | -3.15199 | -0.63011 |
| H  | -5.92677 | -2.60034 | 0.996687 |
| H  | -5.43011 | -1.63494 | -0.38759 |
| C  | 1.523093 | 6.055933 | 0.846982 |
| H  | 2.947251 | 5.606592 | -0.71763 |
| H  | 1.278961 | 5.49046  | -1.22995 |
| C  | 4.503971 | 3.453556 | 0.413359 |
| C  | 3.411394 | 0.533259 | 0.511348 |
| C  | 3.347165 | -5.30709 | 0.900106 |
| H  | 2.996364 | -4.85866 | -1.18985 |
| H  | 4.601228 | -4.43997 | -0.6344  |
| C  | 5.372698 | -1.89309 | 0.478106 |
| H  | 1.504251 | 7.131253 | 0.634507 |
| H  | 0.523048 | 5.755847 | 1.179156 |
| H  | 2.213129 | 5.884651 | 1.680636 |
| C  | 5.374612 | 3.328624 | -0.85295 |
| H  | 4.963843 | 2.876365 | 1.225694 |
| H  | 4.511667 | 4.497476 | 0.749178 |
| H  | 4.459917 | 0.705318 | 0.725776 |
| H  | 2.294282 | -5.33659 | 1.201636 |
| H  | 3.675083 | -6.33437 | 0.702587 |
| H  | 3.923315 | -4.92199 | 1.748759 |
| C  | 6.182749 | -1.50945 | -0.77633 |
| H  | 5.70466  | -2.87775 | 0.828674 |
| H  | 5.610562 | -1.19308 | 1.289229 |
| H  | 5.413187 | 2.291758 | -1.20485 |
| H  | 6.400475 | 3.660779 | -0.65518 |
| H  | 4.969355 | 3.93878  | -1.66778 |
| H  | 7.25714  | -1.49804 | -0.55854 |
| H  | 5.898043 | -0.51663 | -1.14194 |
| H  | 6.006663 | -2.22323 | -1.58874 |
| H  | -4.41632 | 0.083274 | 2.419826 |
| Ni | 0.109248 | -0.01099 | 0.059946 |
| H  | -4.14404 | -1.74261 | 2.287145 |

Computed geometry and energy data of **12**.

Electronic energy E = -1824.890182 a.u. Free Energy G = -1824.227729 a.u. Entropy S = 246.812 kcal/mol•K

Table S10. Atom coordinates of **12**.

|   |          |          |          |
|---|----------|----------|----------|
| N | -1.63589 | 1.032525 | -0.00544 |
| N | -0.86649 | -1.667   | -0.00919 |
| C | -1.74317 | 2.400233 | 0.00404  |
| C | -2.94598 | 0.56434  | -0.02205 |
| C | -0.45222 | -2.9866  | -0.00695 |
| C | -2.21561 | -1.74319 | -0.01525 |
| C | -0.67948 | 3.294997 | 0.016879 |
| C | -3.12933 | 2.816284 | -0.00981 |
| C | -3.22827 | -0.79971 | -0.01865 |
| C | -3.88295 | 1.669845 | -0.02736 |
| C | 0.885314 | -3.35069 | -0.01121 |
| C | -1.59312 | -3.90002 | -0.01141 |
| C | -2.69617 | -3.08455 | -0.0184  |
| C | 0.662462 | 2.961645 | 0.020683 |
| H | -0.92539 | 4.350322 | 0.018629 |
| C | -3.61746 | 4.239536 | 0.030953 |
| C | -4.55659 | -1.55204 | 0.004634 |
| C | -5.38625 | 1.596676 | -0.09593 |
| C | 1.936101 | -2.44434 | -0.01023 |
| H | 1.127396 | -4.40721 | -0.01908 |
| C | -1.50734 | -5.40117 | 0.037014 |
| C | -4.20331 | -3.0902  | -0.04577 |
| C | 1.742503 | 3.932096 | 0.027827 |
| N | 1.157806 | 1.677679 | 0.007093 |
| C | -3.65785 | 4.832516 | 1.453532 |
| H | -4.62166 | 4.292171 | -0.40534 |
| H | -2.9851  | 4.871826 | -0.60518 |
| C | -5.9271  | 1.532502 | -1.5382  |
| H | -5.75758 | 0.737038 | 0.469807 |
| H | -5.8077  | 2.4807   | 0.397399 |
| C | 3.335864 | -2.8284  | -0.01689 |
| N | 1.80748  | -1.07065 | -0.00837 |
| C | -1.29199 | -5.95553 | 1.459223 |
| H | -2.42991 | -5.82627 | -0.3759  |
| H | -0.69529 | -5.75303 | -0.61296 |
| C | -4.80303 | -3.78956 | -1.27783 |
| C | 1.57396  | 5.426272 | 0.079925 |
| C | 2.907853 | 3.21324  | 0.01964  |
| C | 2.525682 | 1.812734 | 0.005131 |
| H | -2.66362 | 4.824499 | 1.913654 |
| H | -4.32551 | 4.251765 | 2.099722 |
| H | -4.01696 | 5.868157 | 1.434154 |
| H | -7.02201 | 1.47631  | -1.5422  |
| H | -5.53895 | 0.658048 | -2.07196 |
| H | -5.62898 | 2.421291 | -2.10541 |
| C | 3.852146 | -4.24142 | 0.015173 |

|    |          |          |          |
|----|----------|----------|----------|
| C  | 4.058962 | -1.66527 | -0.01588 |
| C  | 3.092638 | -0.58259 | -0.01165 |
| H  | -2.11548 | -5.66362 | 2.120358 |
| H  | -1.23563 | -7.05033 | 1.446673 |
| H  | -0.36389 | -5.57125 | 1.896637 |
| H  | -4.52991 | -4.85024 | -1.30429 |
| H  | -5.89748 | -3.72415 | -1.26797 |
| H  | -4.44048 | -3.32517 | -2.20231 |
| C  | 1.329056 | 5.965189 | 1.503422 |
| H  | 2.468326 | 5.906236 | -0.33435 |
| H  | 0.74393  | 5.732762 | -0.5695  |
| C  | 4.319525 | 3.732791 | -0.01388 |
| C  | 3.429985 | 0.761589 | -0.00251 |
| C  | 3.882603 | -4.85029 | 1.431183 |
| H  | 3.242237 | -4.87825 | -0.63837 |
| H  | 4.864105 | -4.26655 | -0.40569 |
| C  | 5.554015 | -1.50077 | -0.05643 |
| H  | 1.208796 | 7.054781 | 1.49211  |
| H  | 0.426288 | 5.526578 | 1.942522 |
| H  | 2.169459 | 5.721139 | 2.162691 |
| C  | 4.925155 | 3.769158 | -1.43113 |
| H  | 4.959133 | 3.121964 | 0.63617  |
| H  | 4.343616 | 4.743392 | 0.410316 |
| H  | 4.484391 | 1.011317 | 0.003651 |
| H  | 2.881777 | -4.8669  | 1.876422 |
| H  | 4.261875 | -5.87853 | 1.404942 |
| H  | 4.529462 | -4.26447 | 2.093653 |
| C  | 6.104334 | -1.25092 | -1.47467 |
| H  | 6.028518 | -2.39822 | 0.357511 |
| H  | 5.857865 | -0.67442 | 0.598966 |
| H  | 4.942348 | 2.769939 | -1.88001 |
| H  | 5.952867 | 4.149933 | -1.40599 |
| H  | 4.33675  | 4.417396 | -2.08996 |
| H  | 7.194164 | -1.13387 | -1.45471 |
| H  | 5.671705 | -0.34484 | -1.91289 |
| H  | 5.862784 | -2.08753 | -2.13967 |
| Ni | 0.126031 | -0.00267 | -0.00383 |
| H  | -4.6053  | -3.58015 | 0.85139  |
| H  | -5.12757 | -1.32272 | 0.912808 |
| H  | -5.19844 | -1.27922 | -0.84117 |

Computed geometry and energy data of methyl ester analog of **7d**.

Electronic energy E = -2688.533325 a.u. Free Energy G = -2687.874316 a.u. Entropy S = 384.519 kcal/mol•K

Table S11. Atom coordinates of methyl ester analog of **7d**.

|   |          |          |          |
|---|----------|----------|----------|
| C | 2.916747 | -2.69292 | 0.23832  |
| C | 3.513558 | -1.54446 | 0.699346 |
| C | 2.471563 | -0.52558 | 0.723494 |
| N | 1.290336 | -1.04485 | 0.25283  |
| C | 1.528925 | -2.37949 | 0.014521 |
| C | -3.0441  | -3.36788 | -0.16817 |

|   |          |          |          |
|---|----------|----------|----------|
| C | -1.85796 | -4.04858 | -0.24303 |
| C | -0.81119 | -3.04517 | -0.25316 |
| N | -1.34523 | -1.77917 | -0.21264 |
| C | -2.70742 | -1.95439 | -0.19199 |
| C | 0.54315  | -3.32351 | -0.24251 |
| C | -3.45962 | 2.488161 | -1.41702 |
| C | -4.21045 | 1.394428 | -1.07584 |
| C | -3.27601 | 0.378703 | -0.63025 |
| N | -1.98858 | 0.856645 | -0.65001 |
| C | -2.08059 | 2.143808 | -1.12369 |
| C | -3.62941 | -0.92903 | -0.33327 |
| C | 2.196382 | 3.257165 | 0.353114 |
| C | 1.212301 | 3.810307 | -0.42934 |
| C | 0.245403 | 2.771676 | -0.67151 |
| N | 0.668277 | 1.57764  | -0.13887 |
| C | 1.86218  | 1.845234 | 0.499124 |
| C | 2.660255 | 0.831273 | 1.07824  |
| C | -1.01409 | 3.020267 | -1.2029  |
| C | -1.62336 | -5.52941 | -0.27791 |
| C | -5.69706 | 1.214353 | -1.15984 |
| C | 1.08502  | 5.221012 | -0.92586 |
| C | 4.984686 | -1.39023 | 0.971981 |
| C | -4.43615 | -3.92398 | -0.07135 |
| C | -4.96696 | -3.92463 | 1.374039 |
| C | -6.38704 | -4.46027 | 1.46377  |
| C | -3.93113 | 3.821237 | -1.92648 |
| C | -4.18152 | 4.831422 | -0.79117 |
| C | -4.61881 | 6.189813 | -1.31624 |
| C | 3.407433 | 3.991853 | 0.858612 |
| C | 4.694083 | 3.698919 | 0.045855 |
| C | 5.944289 | 4.022802 | 0.837324 |
| C | 3.557416 | -4.02613 | -0.02979 |
| C | 3.896547 | -4.23608 | -1.51679 |
| C | 4.451938 | -5.61872 | -1.79846 |
| O | 4.411769 | -6.56379 | -1.03674 |
| O | 4.993908 | -5.68098 | -3.03298 |
| O | -7.02903 | -4.82163 | 0.502238 |
| O | -6.96827 | -4.53368 | 2.68847  |
| O | -4.72272 | 6.451102 | -2.49431 |
| O | -4.90276 | 7.164789 | -0.41482 |
| O | 6.852918 | 4.696404 | 0.11264  |
| O | 6.119995 | 3.692072 | 1.996746 |
| H | 0.846115 | -4.36063 | -0.3299  |
| H | -4.68313 | -1.18298 | -0.3407  |
| H | -1.20145 | 4.013917 | -1.59345 |
| H | -0.98121 | -5.81659 | -1.11958 |
| H | -1.13165 | -5.88505 | 0.636908 |
| H | -2.56362 | -6.07881 | -0.38048 |
| H | -6.18041 | 2.096343 | -1.59005 |
| H | -5.96603 | 0.354444 | -1.78575 |

|    |          |          |          |
|----|----------|----------|----------|
| H  | -6.1427  | 1.04335  | -0.17117 |
| H  | 0.919421 | 5.2502   | -2.00955 |
| H  | 0.240443 | 5.743366 | -0.45738 |
| H  | 1.984311 | 5.806983 | -0.71886 |
| H  | 5.355734 | -0.40997 | 0.659274 |
| H  | 5.233264 | -1.51194 | 2.033797 |
| H  | 5.550845 | -2.14834 | 0.422332 |
| H  | -5.12927 | -3.35579 | -0.70093 |
| H  | -4.46304 | -4.94819 | -0.45573 |
| H  | -4.30973 | -4.52413 | 2.017038 |
| H  | -4.93783 | -2.90942 | 1.791202 |
| H  | -3.20639 | 4.248554 | -2.6271  |
| H  | -4.85632 | 3.701054 | -2.49915 |
| H  | -4.94245 | 4.444108 | -0.10167 |
| H  | -3.27395 | 4.955088 | -0.18564 |
| H  | 3.213508 | 5.068461 | 0.813549 |
| H  | 3.587036 | 3.776982 | 1.914751 |
| H  | 4.746941 | 2.630635 | -0.20011 |
| H  | 4.691265 | 4.241116 | -0.90288 |
| H  | 4.471361 | -4.13029 | 0.563683 |
| H  | 2.903408 | -4.84191 | 0.296902 |
| H  | 2.999706 | -4.10428 | -2.13689 |
| H  | 4.613323 | -3.48729 | -1.87204 |
| C  | 5.517966 | -6.96366 | -3.42009 |
| H  | 4.727312 | -7.71862 | -3.41693 |
| H  | 5.911391 | -6.82679 | -4.42745 |
| H  | 6.312274 | -7.27551 | -2.73699 |
| C  | 8.090874 | 5.001619 | 0.78453  |
| H  | 8.696287 | 5.533446 | 0.050947 |
| H  | 7.904713 | 5.630077 | 1.658866 |
| H  | 8.589224 | 4.082321 | 1.10189  |
| C  | -4.80996 | 6.930343 | 0.995454 |
| H  | -5.07349 | 7.878628 | 1.465586 |
| H  | -5.51459 | 6.158867 | 1.322722 |
| H  | -3.79412 | 6.651206 | 1.293359 |
| C  | -6.27055 | -4.12876 | 3.872596 |
| H  | -5.37771 | -4.73908 | 4.042667 |
| H  | -5.99152 | -3.07076 | 3.835265 |
| H  | -6.97331 | -4.28566 | 4.691868 |
| Ni | -0.35104 | -0.09601 | -0.17273 |
| C  | 3.70304  | 1.141789 | 2.053324 |
| H  | 4.338567 | 2.016167 | 2.076581 |
| N  | 3.871772 | 0.367142 | 3.090906 |
| N  | 4.048816 | -0.29442 | 4.008599 |

Computed geometry and energy data of **7e**.

Electronic energy E = -2578.999345 a.u. Free Energy G = -2578.358383 a.u. Entropy S = 388.036 kcal/mol•K

Table S12. Atom coordinates of **7e**.

|   |          |          |          |
|---|----------|----------|----------|
| N | -1.78613 | 0.580176 | 0.182539 |
| N | -0.45729 | -1.85794 | 0.03464  |

|   |          |          |          |
|---|----------|----------|----------|
| C | -2.28135 | 1.829567 | -0.16334 |
| C | -2.87533 | -0.20243 | 0.387954 |
| C | 0.327891 | -2.93177 | -0.37431 |
| C | -1.65716 | -2.38922 | 0.354621 |
| C | -1.49867 | 2.966392 | -0.29555 |
| C | -3.71586 | 1.794232 | -0.22848 |
| C | -2.77552 | -1.58951 | 0.832302 |
| C | -4.0957  | 0.515121 | 0.136441 |
| C | 1.696227 | -2.86803 | -0.56236 |
| C | -0.44466 | -4.14567 | -0.36419 |
| C | -1.69055 | -3.80911 | 0.126405 |
| C | -0.13012 | 3.021198 | -0.06399 |
| H | -2.00309 | 3.900571 | -0.51811 |
| C | -4.6088  | 2.950369 | -0.58001 |
| C | -3.6729  | -2.05604 | 1.718595 |
| C | -5.50081 | -0.01392 | 0.182722 |
| C | 2.491122 | -1.75518 | -0.30433 |
| H | 2.199639 | -3.78746 | -0.8422  |
| C | 0.059158 | -5.49637 | -0.77856 |
| C | -2.87257 | -4.71141 | 0.342749 |
| C | 0.637282 | 4.243663 | 0.039063 |
| N | 0.668538 | 1.92334  | 0.150217 |
| C | -5.09367 | 3.724695 | 0.658931 |
| H | -5.48429 | 2.591619 | -1.13364 |
| H | -4.09939 | 3.644855 | -1.25576 |
| H | -5.54028 | -1.07806 | -0.07036 |
| H | -5.96586 | 0.101938 | 1.171231 |
| C | 3.936636 | -1.76485 | -0.26317 |
| N | 2.00197  | -0.51335 | 0.025301 |
| H | -0.69461 | -6.27028 | -0.60843 |
| H | 0.323496 | -5.52188 | -1.84354 |
| C | -3.85919 | -4.69638 | -0.83724 |
| H | -3.40593 | -4.4172  | 1.255231 |
| H | -2.53641 | -5.74009 | 0.508697 |
| C | 0.085422 | 5.62579  | -0.14956 |
| C | 1.920541 | 3.87012  | 0.350588 |
| C | 1.926943 | 2.419695 | 0.383447 |
| H | -4.24162 | 4.094407 | 1.244065 |
| H | -5.65447 | 3.072278 | 1.338618 |
| C | 4.810367 | -2.95694 | -0.53812 |
| C | 4.320767 | -0.50446 | 0.128234 |
| C | 3.104743 | 0.26529  | 0.272471 |
| H | -3.35256 | -4.98292 | -1.76837 |
| H | -4.25099 | -3.6879  | -1.01236 |
| H | 0.841579 | 6.387129 | 0.062947 |
| H | -0.26326 | 5.787007 | -1.17793 |
| C | 3.122751 | 4.749201 | 0.552909 |
| C | 3.067332 | 1.636447 | 0.512717 |
| C | 5.036883 | -3.82763 | 0.710758 |
| H | 4.381498 | -3.57859 | -1.33138 |

|    |          |          |          |
|----|----------|----------|----------|
| H  | 5.782957 | -2.6276  | -0.91945 |
| C  | 5.706958 | 0.025709 | 0.346136 |
| C  | 3.918515 | 4.978052 | -0.74457 |
| H  | 3.790715 | 4.322213 | 1.308878 |
| H  | 2.812824 | 5.720969 | 0.951841 |
| H  | 4.009312 | 2.137668 | 0.704601 |
| H  | 4.080451 | -4.16914 | 1.127194 |
| H  | 5.514129 | -3.25037 | 1.511532 |
| H  | 6.462837 | -0.72533 | 0.098474 |
| H  | 5.869333 | 0.32348  | 1.390216 |
| H  | 4.239252 | 4.023885 | -1.18136 |
| H  | 3.292641 | 5.453513 | -1.50956 |
| H  | -4.6146  | -1.66105 | 2.079577 |
| Ni | 0.111454 | 0.033925 | 0.120539 |
| H  | -6.13614 | 0.521752 | -0.53155 |
| C  | -5.02875 | -5.63985 | -0.63641 |
| O  | -5.13994 | -6.44949 | 0.261622 |
| O  | -5.95298 | -5.47713 | -1.60833 |
| C  | 5.888401 | -5.04957 | 0.425494 |
| O  | 6.28239  | -5.39632 | -0.66958 |
| O  | 6.156535 | -5.72658 | 1.561906 |
| C  | 5.148962 | 5.838487 | -0.5317  |
| O  | 5.52659  | 6.280249 | 0.534469 |
| O  | 5.792289 | 6.056866 | -1.69814 |
| C  | -5.96824 | 4.911126 | 0.302124 |
| O  | -6.20103 | 5.304604 | -0.82278 |
| O  | -6.46315 | 5.497361 | 1.412905 |
| H  | -0.76785 | 5.816159 | 0.513106 |
| H  | 0.956908 | -5.78617 | -0.21787 |
| H  | 5.906972 | 0.908457 | -0.27427 |
| C  | -7.29701 | 6.648594 | 1.19186  |
| H  | -7.59716 | 6.986984 | 2.183704 |
| H  | -6.74014 | 7.432453 | 0.671771 |
| H  | -8.17382 | 6.379045 | 0.597302 |
| C  | 6.983314 | 6.859242 | -1.61344 |
| H  | 7.362196 | 6.928574 | -2.63323 |
| H  | 6.749775 | 7.853174 | -1.22299 |
| H  | 7.721384 | 6.383867 | -0.96205 |
| C  | 6.947477 | -6.91812 | 1.406672 |
| H  | 7.923132 | -6.67795 | 0.976154 |
| H  | 7.062635 | -7.32547 | 2.411205 |
| H  | 6.437837 | -7.63583 | 0.75843  |
| C  | -7.09773 | -6.34411 | -1.53086 |
| H  | -7.72524 | -6.07718 | -2.38145 |
| H  | -6.79187 | -7.39175 | -1.59459 |
| H  | -7.63656 | -6.18635 | -0.59286 |

Computed geometry and energy data of **7f**.

Electronic energy E = -2579.004906 a.u. Free Energy G = -2578.364214 a.u. Entropy S = 389.403 kcal/mol•K  
Table S13. Atom coordinates of **7f**.



|   |          |          |          |
|---|----------|----------|----------|
| N | 1.791416 | 0.605055 | -0.13779 |
| N | 0.512088 | -1.84881 | -0.04056 |
| C | 2.256807 | 1.87043  | 0.180439 |
| C | 2.900021 | -0.13621 | -0.41079 |
| C | -0.25805 | -2.93605 | 0.344378 |
| C | 1.739981 | -2.35338 | -0.32595 |
| C | 1.45008  | 2.988799 | 0.337303 |
| C | 3.692801 | 1.893748 | 0.165783 |
| C | 2.8525   | -1.54049 | -0.77624 |
| C | 4.102124 | 0.635469 | -0.23164 |
| C | -1.63214 | -2.9084  | 0.51485  |
| C | 0.537618 | -4.13476 | 0.357438 |
| C | 1.789328 | -3.77817 | -0.09757 |
| C | 0.07967  | 3.017624 | 0.132741 |
| H | 1.940303 | 3.932711 | 0.549451 |
| C | 4.553792 | 3.0876   | 0.468658 |
| C | 3.843229 | -2.10097 | -1.51267 |
| C | 5.522929 | 0.1712   | -0.37276 |
| C | -2.44556 | -1.81271 | 0.258613 |
| H | -2.11647 | -3.84253 | 0.777834 |
| C | 0.042267 | -5.49011 | 0.767743 |
| C | 2.981132 | -4.68287 | -0.2539  |
| C | -0.71471 | 4.225155 | 0.063841 |
| N | -0.69663 | 1.906718 | -0.10533 |
| C | 4.907061 | 3.899755 | -0.7902  |
| H | 5.484012 | 2.767099 | 0.951298 |
| H | 4.062633 | 3.747277 | 1.1914   |
| H | 5.654216 | -0.8543  | -0.01043 |
| H | 5.873411 | 0.193524 | -1.41388 |
| C | -3.89208 | -1.85461 | 0.191921 |
| N | -1.97926 | -0.55378 | -0.03424 |
| H | 0.812962 | -6.25437 | 0.635538 |
| H | -0.26168 | -5.5084  | 1.822186 |
| C | 3.949109 | -4.60685 | 0.938698 |
| H | 3.53102  | -4.44357 | -1.17052 |
| H | 2.646331 | -5.71876 | -0.37028 |
| C | -0.19205 | 5.613871 | 0.284576 |
| C | -1.99003 | 3.831148 | -0.25344 |
| C | -1.96427 | 2.382365 | -0.32428 |
| H | 3.998405 | 4.240823 | -1.30248 |
| H | 5.43959  | 3.280031 | -1.52175 |
| C | -4.73938 | -3.07406 | 0.425519 |
| C | -4.29806 | -0.59653 | -0.1764  |
| C | -3.09659 | 0.206014 | -0.28087 |
| H | 3.432555 | -4.84978 | 1.87612  |
| H | 4.334229 | -3.58855 | 1.067146 |
| H | -0.96616 | 6.363738 | 0.097427 |
| H | 0.161182 | 5.755862 | 1.314166 |
| C | -3.21218 | 4.687571 | -0.43232 |
| C | -3.08906 | 1.580297 | -0.48292 |

|    |          |          |          |
|----|----------|----------|----------|
| C  | -4.90019 | -3.93681 | -0.83893 |
| H  | -4.31742 | -3.69237 | 1.225187 |
| H  | -5.7327  | -2.77729 | 0.778874 |
| C  | -5.69135 | -0.09151 | -0.40697 |
| C  | -4.0194  | 4.854879 | 0.867419 |
| H  | -3.86679 | 4.270048 | -1.20505 |
| H  | -2.92383 | 5.678978 | -0.79779 |
| H  | -4.03957 | 2.067081 | -0.66936 |
| H  | -3.92127 | -4.24339 | -1.22941 |
| H  | -5.37121 | -3.36543 | -1.64762 |
| H  | -6.4346  | -0.86656 | -0.19838 |
| H  | -5.83862 | 0.235088 | -1.44457 |
| H  | -4.31828 | 3.879152 | 1.271095 |
| H  | -3.40967 | 5.320531 | 1.651094 |
| H  | 4.727213 | -1.76679 | -2.03373 |
| Ni | -0.09696 | 0.028824 | -0.09736 |
| H  | 6.196475 | 0.814764 | 0.203076 |
| C  | 5.1292   | -5.54731 | 0.794631 |
| O  | 5.300584 | -6.33599 | -0.11269 |
| O  | 5.989622 | -5.40443 | 1.826353 |
| C  | -5.7209  | -5.18795 | -0.59273 |
| O  | -6.14035 | -5.55722 | 0.485394 |
| O  | -5.92825 | -5.86284 | -1.74314 |
| C  | -5.27057 | 5.689739 | 0.674727 |
| O  | -5.66353 | 6.140626 | -0.3821  |
| O  | -5.91416 | 5.872332 | 1.847259 |
| C  | 5.760669 | 5.114952 | -0.48324 |
| O  | 6.108027 | 5.473794 | 0.623537 |
| O  | 6.09305  | 5.769483 | -1.61629 |
| H  | 0.651741 | 5.840398 | -0.37903 |
| H  | -0.82932 | -5.80005 | 0.177186 |
| H  | -5.9237  | 0.767122 | 0.23571  |
| C  | 6.898678 | 6.948442 | -1.44213 |
| H  | 7.065285 | 7.339707 | -2.44587 |
| H  | 6.374963 | 7.684219 | -0.82616 |
| H  | 7.850033 | 6.696608 | -0.96622 |
| C  | -7.12537 | 6.645572 | 1.780627 |
| H  | -7.50144 | 6.688457 | 2.802913 |
| H  | -6.91871 | 7.651425 | 1.405827 |
| H  | -7.85412 | 6.162559 | 1.124359 |
| C  | -6.68493 | -7.08054 | -1.62485 |
| H  | -7.68239 | -6.87577 | -1.22729 |
| H  | -6.75156 | -7.48267 | -2.63587 |
| H  | -6.17524 | -7.78707 | -0.96448 |
| C  | 7.144531 | -6.26079 | 1.797632 |
| H  | 7.714387 | -6.01382 | 2.69363  |
| H  | 6.844599 | -7.31195 | 1.812258 |
| H  | 7.740714 | -6.0726  | 0.90078  |

---

Computed geometry and energy data of triplet **7g**.

Electronic energy E = -2579.033576 a.u. Free Energy G = -2578.389897 a.u. Entropy S = 384.137 kcal/mol•K  
Table S14. Atom coordinates of **7g**.

|   |          |          |          |
|---|----------|----------|----------|
| N | -1.78088 | 0.055935 | 0.036141 |
| N | 0.011964 | -2.03614 | -0.12161 |
| C | -2.51661 | 1.186208 | -0.28806 |
| C | -2.68934 | -0.92084 | 0.283328 |
| C | 0.989455 | -2.89009 | -0.61405 |
| C | -1.07847 | -2.80656 | 0.102464 |
| C | -1.97862 | 2.460241 | -0.38889 |
| C | -3.91805 | 0.871378 | -0.31638 |
| C | -2.3064  | -2.26851 | 0.670832 |
| C | -4.03275 | -0.45287 | 0.067937 |
| C | 2.328323 | -2.5523  | -0.73399 |
| C | 0.454164 | -4.2119  | -0.7803  |
| C | -0.84531 | -4.16856 | -0.30707 |
| C | -0.65633 | 2.789415 | -0.11751 |
| H | -2.65976 | 3.276722 | -0.60423 |
| C | -5.0269  | 1.830751 | -0.64441 |
| C | -3.06493 | -2.99606 | 1.536453 |
| C | -5.30587 | -1.24544 | 0.159161 |
| C | 2.877322 | -1.33296 | -0.35348 |
| H | 3.009828 | -3.32984 | -1.06248 |
| C | 1.220211 | -5.3817  | -1.32387 |
| C | -1.83465 | -5.31044 | -0.30344 |
| C | -0.15529 | 4.138095 | 0.02504  |
| N | 0.338494 | 1.872042 | 0.129844 |
| C | -5.61218 | 2.513449 | 0.604765 |
| H | -5.83514 | 1.30526  | -1.16544 |
| H | -4.68023 | 2.600176 | -1.34228 |
| H | -5.16796 | -2.28035 | -0.17074 |
| H | -5.70859 | -1.28231 | 1.180872 |
| C | 4.293738 | -1.06067 | -0.22742 |
| N | 2.137552 | -0.23176 | 0.005897 |
| H | 0.557594 | -6.20945 | -1.59323 |
| H | 1.786796 | -5.11103 | -2.22211 |
| C | -3.14445 | -4.98734 | -0.94138 |
| H | -2.02055 | -5.70755 | 0.701613 |
| H | -1.38042 | -6.14851 | -0.85681 |
| C | -0.96271 | 5.385064 | -0.18481 |
| C | 1.16181  | 4.025141 | 0.398197 |
| C | 1.458171 | 2.606232 | 0.426461 |
| H | -4.83722 | 3.067982 | 1.1487   |
| H | -5.99236 | 1.769404 | 1.315569 |
| C | 5.396825 | -2.04259 | -0.5077  |
| C | 4.400758 | 0.225775 | 0.241917 |
| C | 3.049484 | 0.736507 | 0.344749 |
| H | -3.17534 | -4.40932 | -1.85934 |
| H | -0.38167 | 6.279369 | 0.058563 |
| H | -1.29563 | 5.482952 | -1.22624 |
| C | 2.151899 | 5.125436 | 0.660048 |

|    |          |          |          |
|----|----------|----------|----------|
| C  | 2.7267   | 2.063107 | 0.611506 |
| C  | 5.707571 | -2.94755 | 0.697806 |
| H  | 5.145144 | -2.6723  | -1.3681  |
| H  | 6.309662 | -1.50881 | -0.79276 |
| C  | 5.641241 | 1.004573 | 0.564605 |
| C  | 2.944555 | 5.524159 | -0.59766 |
| H  | 2.856232 | 4.832602 | 1.446328 |
| H  | 1.634377 | 6.010399 | 1.045713 |
| H  | 3.537193 | 2.737528 | 0.863769 |
| H  | 4.811333 | -3.49578 | 1.015321 |
| H  | 6.010125 | -2.35285 | 1.568005 |
| H  | 6.542758 | 0.429547 | 0.333776 |
| H  | 5.686329 | 1.274923 | 1.627581 |
| H  | 3.4737   | 4.658748 | -1.01661 |
| H  | 2.271846 | 5.867759 | -1.39267 |
| H  | -3.96144 | -2.58587 | 1.984327 |
| Ni | 0.180933 | -0.08174 | 0.038197 |
| H  | -6.08145 | -0.79653 | -0.47099 |
| C  | -4.39155 | -5.4556  | -0.37562 |
| O  | -4.49668 | -6.13593 | 0.640364 |
| O  | -5.46524 | -5.04604 | -1.10677 |
| C  | 6.798708 | -3.95895 | 0.404317 |
| O  | 7.330832 | -4.13207 | -0.6734  |
| O  | 7.111051 | -4.6662  | 1.510833 |
| C  | 3.963287 | 6.614508 | -0.32791 |
| O  | 4.211781 | 7.097387 | 0.75819  |
| O  | 4.580655 | 6.99049  | -1.4681  |
| C  | -6.73994 | 3.471863 | 0.274055 |
| O  | -7.16547 | 3.706288 | -0.83876 |
| O  | -7.22679 | 4.048303 | 1.393718 |
| H  | -1.86228 | 5.397273 | 0.443174 |
| H  | 1.939753 | -5.77176 | -0.5911  |
| H  | 5.693829 | 1.940021 | -0.00673 |
| C  | -8.30585 | 4.979097 | 1.197557 |
| H  | -8.56302 | 5.342594 | 2.192596 |
| H  | -7.98819 | 5.806434 | 0.557566 |
| H  | -9.16378 | 4.481245 | 0.738021 |
| C  | 5.578546 | 8.016995 | -1.32749 |
| H  | 5.963196 | 8.190596 | -2.3326  |
| H  | 5.134992 | 8.930815 | -0.9236  |
| H  | 6.380212 | 7.685122 | -0.66246 |
| C  | 8.129819 | -5.66811 | 1.344232 |
| H  | 9.068942 | -5.21088 | 1.021845 |
| H  | 8.246937 | -6.13162 | 2.323904 |
| H  | 7.821233 | -6.41047 | 0.603501 |
| C  | -6.74154 | -5.48187 | -0.61864 |
| H  | -7.4768  | -5.07049 | -1.31085 |
| H  | -6.7978  | -6.57413 | -0.60633 |
| H  | -6.91815 | -5.1075  | 0.393725 |
| H  | -2.78057 | -3.9922  | 1.850974 |

Computed geometry and energy data of triplet **7h**.

Electronic energy E = -2579.038703 a.u. Free Energy G = -2578.398289 a.u. Entropy S = 388.842 kcal/mol•K

Table S15. Atom coordinates of **7h**.

|   |          |          |          |
|---|----------|----------|----------|
| N | -1.79508 | 0.389358 | 0.152025 |
| N | -0.28863 | -1.93082 | 0.007783 |
| C | -2.39626 | 1.598407 | -0.16857 |
| C | -2.8036  | -0.44213 | 0.512177 |
| C | 0.570605 | -2.93294 | -0.43855 |
| C | -1.48959 | -2.52143 | 0.217622 |
| C | -1.70468 | 2.778863 | -0.37857 |
| C | -3.82645 | 1.481008 | -0.06767 |
| C | -2.57653 | -1.827   | 0.885482 |
| C | -4.08486 | 0.203504 | 0.392294 |
| C | 1.946921 | -2.77672 | -0.53589 |
| C | -0.13632 | -4.15944 | -0.59904 |
| C | -1.47792 | -3.9121  | -0.20881 |
| C | -0.33454 | 2.940968 | -0.19696 |
| H | -2.2844  | 3.667878 | -0.60259 |
| C | -4.81764 | 2.573719 | -0.35133 |
| C | -3.31646 | -2.44521 | 1.849625 |
| C | -5.4367  | -0.39866 | 0.647184 |
| C | 2.647265 | -1.62024 | -0.21608 |
| H | 2.52852  | -3.65084 | -0.80616 |
| C | 0.400864 | -5.45418 | -1.12047 |
| C | -2.51664 | -4.84596 | -0.37055 |
| C | 0.341803 | 4.218493 | -0.16646 |
| N | 0.541159 | 1.917807 | 0.07696  |
| C | -5.19109 | 3.380363 | 0.90551  |
| H | -5.73229 | 2.145992 | -0.7783  |
| H | -4.43217 | 3.26062  | -1.11152 |
| H | -5.46578 | -1.46008 | 0.380722 |
| H | -5.73755 | -0.3248  | 1.701487 |
| C | 4.087002 | -1.52852 | -0.09739 |
| N | 2.058798 | -0.40856 | 0.05838  |
| H | 0.27337  | -6.26567 | -0.39161 |
| H | -0.12975 | -5.76304 | -2.03105 |
| C | -3.99004 | -4.59397 | -0.35285 |
| H | -2.23186 | -5.84736 | -0.67742 |
| C | -0.30616 | 5.544342 | -0.43693 |
| C | 1.647553 | 3.957523 | 0.170612 |
| C | 1.758211 | 2.517609 | 0.290997 |
| H | -4.29422 | 3.813838 | 1.367282 |
| H | -5.63427 | 2.73579  | 1.673358 |
| C | 5.050592 | -2.66467 | -0.29699 |
| C | 4.363576 | -0.23507 | 0.274071 |
| C | 3.091869 | 0.453189 | 0.330243 |
| H | -4.25338 | -3.6394  | -0.82722 |
| H | -4.40604 | -4.50878 | 0.665281 |
| H | 0.391502 | 6.369112 | -0.26474 |

|    |          |          |          |
|----|----------|----------|----------|
| H  | -0.65666 | 5.621514 | -1.47433 |
| C  | 2.781283 | 4.93226  | 0.324712 |
| C  | 2.947371 | 1.827668 | 0.496267 |
| C  | 5.218141 | -3.53067 | 0.964281 |
| H  | 4.729167 | -3.30493 | -1.12587 |
| H  | 6.031272 | -2.27624 | -0.59142 |
| C  | 5.6963   | 0.39711  | 0.546268 |
| C  | 3.581937 | 5.125984 | -0.9755  |
| H  | 3.464592 | 4.608257 | 1.117353 |
| H  | 2.396709 | 5.904918 | 0.649718 |
| H  | 3.843359 | 2.406487 | 0.690266 |
| H  | 4.251343 | -3.9333  | 1.292626 |
| H  | 5.586815 | -2.93219 | 1.805916 |
| H  | 6.514069 | -0.30725 | 0.368187 |
| H  | 5.778554 | 0.740819 | 1.585552 |
| H  | 3.980433 | 4.169005 | -1.33573 |
| H  | 2.937399 | 5.495962 | -1.78199 |
| H  | -4.10052 | -1.9271  | 2.388286 |
| Ni | 0.135353 | -0.00603 | 0.097589 |
| H  | -6.20544 | 0.115    | 0.059714 |
| C  | -4.77371 | -5.70208 | -1.03956 |
| O  | -4.33881 | -6.78133 | -1.38437 |
| O  | -6.06264 | -5.33524 | -1.19966 |
| C  | 6.165015 | -4.69587 | 0.751718 |
| O  | 6.684674 | -5.00106 | -0.30252 |
| O  | 6.360939 | -5.37422 | 1.902133 |
| C  | 4.742318 | 6.088155 | -0.81032 |
| O  | 5.079708 | 6.616989 | 0.229442 |
| O  | 5.374452 | 6.287921 | -1.98622 |
| C  | -6.1561  | 4.512011 | 0.608643 |
| O  | -6.50308 | 4.873165 | -0.49754 |
| O  | -6.58522 | 5.09202  | 1.749631 |
| H  | -1.17671 | 5.711258 | 0.209653 |
| H  | 1.464014 | -5.39466 | -1.36797 |
| H  | 5.870953 | 1.270245 | -0.09519 |
| C  | -7.49039 | 6.197938 | 1.584996 |
| H  | -7.72486 | 6.536632 | 2.594277 |
| H  | -7.01736 | 6.99974  | 1.011938 |
| H  | -8.3983  | 5.876997 | 1.067707 |
| C  | 6.501665 | 7.180682 | -1.94496 |
| H  | 6.882159 | 7.218533 | -2.9658  |
| H  | 6.191528 | 8.175479 | -1.61454 |
| H  | 7.268092 | 6.800986 | -1.26418 |
| C  | 7.234949 | -6.51332 | 1.813702 |
| H  | 8.232859 | -6.20719 | 1.489022 |
| H  | 7.272093 | -6.93211 | 2.819464 |
| H  | 6.839015 | -7.24765 | 1.107307 |
| C  | -6.91884 | -6.31692 | -1.80967 |
| H  | -7.90353 | -5.85238 | -1.8643  |
| H  | -6.55893 | -6.5712  | -2.80988 |

|   |          |          |          |
|---|----------|----------|----------|
| H | -6.95661 | -7.22468 | -1.20164 |
| H | -3.09536 | -3.46214 | 2.152945 |

Computed geometry and energy data of triplet **7i**.

Electronic energy E = -2579.038282 a.u. Free Energy G = -2578.396461 a.u. Entropy S = 387.024 kcal/mol•K

Table S16. Atom coordinates of **7i**.

|   |          |          |          |
|---|----------|----------|----------|
| N | 1.783047 | 0.425523 | -0.19505 |
| N | 0.297404 | -1.8932  | -0.10555 |
| C | 2.369596 | 1.631878 | 0.180861 |
| C | 2.793928 | -0.4092  | -0.53144 |
| C | -0.53013 | -2.89431 | 0.386215 |
| C | 1.46784  | -2.49618 | -0.4175  |
| C | 1.659367 | 2.812297 | 0.366484 |
| C | 3.789002 | 1.523392 | 0.160562 |
| C | 2.577697 | -1.76161 | -1.00847 |
| C | 4.090439 | 0.21933  | -0.31095 |
| C | -1.89322 | -2.75235 | 0.569314 |
| C | 0.192944 | -4.13632 | 0.467408 |
| C | 1.447634 | -3.89726 | -0.0593  |
| C | 0.298723 | 2.968974 | 0.139717 |
| H | 2.228111 | 3.702759 | 0.611807 |
| C | 4.777165 | 2.597468 | 0.500549 |
| C | 3.374464 | -2.31384 | -1.96873 |
| C | 5.36456  | -0.33554 | -0.45166 |
| C | -2.61964 | -1.60371 | 0.259214 |
| H | -2.44831 | -3.6285  | 0.88706  |
| C | -0.37452 | -5.41406 | 1.011264 |
| C | 2.588639 | -4.87978 | -0.12056 |
| C | -0.38703 | 4.239508 | 0.078268 |
| N | -0.56729 | 1.935057 | -0.13621 |
| C | 5.305232 | 3.331781 | -0.74665 |
| H | 5.627527 | 2.162543 | 1.03949  |
| H | 4.338563 | 3.329757 | 1.185629 |
| H | 5.519557 | -1.36406 | -0.7502  |
| C | -4.06365 | -1.5278  | 0.183887 |
| N | -2.05183 | -0.4     | -0.07206 |
| H | 0.346316 | -6.23366 | 0.953121 |
| H | -0.67061 | -5.30917 | 2.062631 |
| C | 3.701753 | -4.5664  | 0.893869 |
| H | 3.031024 | -4.93785 | -1.11837 |
| H | 2.208457 | -5.88579 | 0.081503 |
| C | 0.245284 | 5.574987 | 0.337962 |
| C | -1.6861  | 3.962386 | -0.27465 |
| C | -1.78376 | 2.520321 | -0.3713  |
| H | 4.478218 | 3.78761  | -1.30639 |
| H | 5.78156  | 2.631863 | -1.44284 |
| C | -5.00904 | -2.66465 | 0.454419 |
| C | -4.36374 | -0.25201 | -0.22786 |
| C | -3.10092 | 0.446926 | -0.34446 |
| H | 3.306163 | -4.54363 | 1.916368 |

|    |          |          |          |
|----|----------|----------|----------|
| H  | 4.124814 | -3.57026 | 0.715618 |
| H  | -0.45456 | 6.391037 | 0.135671 |
| H  | 0.57249  | 5.673823 | 1.381187 |
| C  | -2.82526 | 4.925521 | -0.45997 |
| C  | -2.97162 | 1.813048 | -0.55486 |
| C  | -5.22395 | -3.56554 | -0.77501 |
| H  | -4.64766 | -3.28034 | 1.285259 |
| H  | -5.97922 | -2.27445 | 0.780329 |
| C  | -5.71023 | 0.35741  | -0.48276 |
| C  | -3.63557 | 5.145676 | 0.830067 |
| H  | -3.50103 | 4.577847 | -1.24903 |
| H  | -2.4449  | 5.892548 | -0.80622 |
| H  | -3.87387 | 2.379713 | -0.75567 |
| H  | -4.26679 | -3.96264 | -1.13755 |
| H  | -5.64112 | -2.9961  | -1.6137  |
| H  | -6.51518 | -0.34787 | -0.25659 |
| H  | -5.82539 | 0.66358  | -1.53057 |
| H  | -4.02921 | 4.195135 | 1.212052 |
| H  | -2.99871 | 5.540495 | 1.630889 |
| H  | 4.16834  | -1.7438  | -2.43556 |
| Ni | -0.14045 | 0.021578 | -0.15262 |
| H  | 6.245056 | 0.241349 | -0.18949 |
| C  | 4.835913 | -5.57028 | 0.838999 |
| O  | 4.943686 | -6.47355 | 0.03412  |
| O  | 5.740856 | -5.33162 | 1.812443 |
| C  | -6.13768 | -4.74069 | -0.48564 |
| O  | -6.55637 | -5.05703 | 0.609494 |
| O  | -6.42876 | -5.41605 | -1.61738 |
| C  | -4.80203 | 6.094714 | 0.634475 |
| O  | -5.13527 | 6.597673 | -0.41931 |
| O  | -5.44497 | 6.315438 | 1.800781 |
| C  | 6.298005 | 4.425113 | -0.40302 |
| O  | 6.58927  | 4.788132 | 0.718534 |
| O  | 6.825633 | 4.966537 | -1.52135 |
| H  | 1.128294 | 5.736366 | -0.29274 |
| H  | -1.26817 | -5.7273  | 0.456021 |
| H  | -5.87495 | 1.250914 | 0.132644 |
| C  | 7.771665 | 6.030119 | -1.31327 |
| H  | 8.085633 | 6.341155 | -2.30978 |
| H  | 7.303283 | 6.862696 | -0.78175 |
| H  | 8.628451 | 5.674123 | -0.73522 |
| C  | -6.57849 | 7.198409 | 1.730984 |
| H  | -6.9666  | 7.256928 | 2.747976 |
| H  | -6.27345 | 8.187599 | 1.379738 |
| H  | -7.33715 | 6.797207 | 1.053836 |
| C  | -7.27405 | -6.5689  | -1.45612 |
| H  | -8.2402  | -6.28048 | -1.03392 |
| H  | -7.40177 | -6.98012 | -2.45755 |
| H  | -6.8014  | -7.30282 | -0.79808 |
| C  | 6.872231 | -6.21881 | 1.84292  |



|   |          |          |          |
|---|----------|----------|----------|
| H | 7.485225 | -5.88255 | 2.679358 |
| H | 6.547247 | -7.2512  | 1.996762 |
| H | 7.434364 | -6.15755 | 0.907252 |
| H | 3.193342 | -3.30925 | -2.35384 |

Computed geometry and energy data of singlet **7g**.

Electronic energy E = -2579.033671 a.u.

Table S17. Atom coordinates of singlet **7g**.

|   |          |          |          |
|---|----------|----------|----------|
| N | -1.78088 | 0.055935 | 0.036425 |
| N | 0.011945 | -2.03614 | -0.12164 |
| C | -2.51665 | 1.186211 | -0.28764 |
| C | -2.6893  | -0.92084 | 0.283748 |
| C | 0.989357 | -2.89009 | -0.61423 |
| C | -1.07845 | -2.80656 | 0.102608 |
| C | -1.97868 | 2.460245 | -0.38855 |
| C | -3.9181  | 0.871381 | -0.31574 |
| C | -2.30629 | -2.26851 | 0.671177 |
| C | -4.03274 | -0.45287 | 0.068576 |
| C | 2.328206 | -2.5523  | -0.73438 |
| C | 0.45404  | -4.2119  | -0.78042 |
| C | -0.84536 | -4.16856 | -0.30698 |
| C | -0.65635 | 2.789416 | -0.11738 |
| H | -2.65986 | 3.276728 | -0.60377 |
| C | -5.027   | 1.830757 | -0.64359 |
| C | -3.06468 | -2.99608 | 1.536912 |
| C | -5.30584 | -1.24544 | 0.159995 |
| C | 2.877266 | -1.33296 | -0.35396 |
| H | 3.009659 | -3.32983 | -1.06299 |
| C | 1.22     | -5.38169 | -1.32412 |
| C | -1.8347  | -5.31043 | -0.3032  |
| C | -0.15528 | 4.138095 | 0.025106 |
| N | 0.338515 | 1.872041 | 0.129809 |
| C | -5.61208 | 2.513443 | 0.605685 |
| H | -5.83533 | 1.305271 | -1.1645  |
| H | -4.68045 | 2.600189 | -1.3415  |
| H | -5.16798 | -2.28035 | -0.16994 |
| H | -5.70841 | -1.28232 | 1.18177  |
| C | 4.293702 | -1.06067 | -0.22812 |
| N | 2.137553 | -0.23176 | 0.005554 |
| H | 0.55734  | -6.20943 | -1.59338 |
| H | 1.786442 | -5.11101 | -2.22244 |
| C | -3.1446  | -4.98733 | -0.94093 |
| H | -2.02044 | -5.70755 | 0.701879 |
| H | -1.38056 | -6.1485  | -0.85665 |
| C | -0.96274 | 5.385066 | -0.1846  |
| C | 1.161873 | 4.025137 | 0.398052 |
| C | 1.458239 | 2.606228 | 0.426254 |
| H | -4.83703 | 3.067971 | 1.149502 |
| H | -5.99215 | 1.769391 | 1.316542 |
| C | 5.396744 | -2.04258 | -0.50858 |

|    |          |          |          |
|----|----------|----------|----------|
| C  | 4.400797 | 0.225773 | 0.241217 |
| C  | 3.049539 | 0.736504 | 0.34427  |
| H  | -3.17563 | -4.4093  | -1.85888 |
| H  | -0.38167 | 6.279368 | 0.058686 |
| H  | -1.29582 | 5.482964 | -1.22598 |
| C  | 2.152004 | 5.125429 | 0.659756 |
| C  | 2.726797 | 2.063101 | 0.611092 |
| C  | 5.707682 | -2.94756 | 0.696867 |
| H  | 5.144926 | -2.67229 | -1.36894 |
| H  | 6.309536 | -1.5088  | -0.79378 |
| C  | 5.641331 | 1.004567 | 0.563715 |
| C  | 2.94446  | 5.524165 | -0.59807 |
| H  | 2.856463 | 4.832588 | 1.44592  |
| H  | 1.634544 | 6.010389 | 1.045512 |
| H  | 3.537331 | 2.737519 | 0.863232 |
| H  | 4.811495 | -3.49579 | 1.014519 |
| H  | 6.010375 | -2.35286 | 1.567023 |
| H  | 6.542811 | 0.429544 | 0.332737 |
| H  | 5.686588 | 1.274907 | 1.626687 |
| H  | 3.473538 | 4.658758 | -1.01711 |
| H  | 2.271624 | 5.867773 | -1.39298 |
| H  | -3.96113 | -2.58589 | 1.984933 |
| Ni | 0.180939 | -0.08174 | 0.038167 |
| H  | -6.08152 | -0.79653 | -0.47003 |
| C  | -4.39161 | -5.4556  | -0.37498 |
| O  | -4.49658 | -6.13594 | 0.64102  |
| O  | -5.46542 | -5.04603 | -1.10595 |
| C  | 6.798772 | -3.95896 | 0.403194 |
| O  | 7.330725 | -4.13206 | -0.67461 |
| O  | 7.111292 | -4.66622 | 1.509653 |
| C  | 3.963235 | 6.614511 | -0.32847 |
| O  | 4.211902 | 7.09738  | 0.757589 |
| O  | 4.580421 | 6.990505 | -1.46876 |
| C  | -6.7399  | 3.47186  | 0.275164 |
| O  | -7.1656  | 3.706296 | -0.83758 |
| O  | -7.22657 | 4.048289 | 1.39491  |
| H  | -1.86221 | 5.397269 | 0.443524 |
| H  | 1.939659 | -5.77175 | -0.59146 |
| H  | 5.693828 | 1.940021 | -0.00762 |
| C  | -8.30566 | 4.979085 | 1.198931 |
| H  | -8.56267 | 5.342572 | 2.194014 |
| H  | -7.9881  | 5.806428 | 0.558897 |
| H  | -9.16367 | 4.481238 | 0.739526 |
| C  | 5.578334 | 8.017008 | -1.3283  |
| H  | 5.962824 | 8.190619 | -2.33347 |
| H  | 5.134845 | 8.930824 | -0.92433 |
| H  | 6.380106 | 7.685129 | -0.6634  |
| C  | 8.130033 | -5.66812 | 1.34288  |
| H  | 9.069105 | -5.21089 | 1.020347 |
| H  | 8.247308 | -6.13164 | 2.322528 |

|   |          |          |          |
|---|----------|----------|----------|
| H | 7.821329 | -6.41048 | 0.60219  |
| C | -6.74164 | -5.48187 | -0.61762 |
| H | -7.47701 | -5.07048 | -1.30971 |
| H | -6.7979  | -6.57412 | -0.60531 |
| H | -6.91809 | -5.1075  | 0.394778 |
| H | -2.78028 | -3.99222 | 1.851378 |

Computed geometry and energy data of singlet **7h**.

Electronic energy E = -2579.047378 a.u. Free Energy G = -2578.399843 a.u. Entropy S = 380.249 kcal/mol•K

Table S18. Atom coordinates of singlet **7h**.

|   |          |          |          |
|---|----------|----------|----------|
| N | 1.831723 | 0.169832 | -0.18697 |
| N | 0.077132 | -1.99599 | -0.0751  |
| C | 2.574373 | 1.286611 | 0.149582 |
| C | 2.736166 | -0.76901 | -0.58892 |
| C | -0.91106 | -2.92082 | 0.414783 |
| C | 1.174024 | -2.6793  | -0.30633 |
| C | 2.010812 | 2.54372  | 0.410358 |
| C | 3.965102 | 1.016795 | 0.00919  |
| C | 2.332199 | -2.1051  | -0.98994 |
| C | 4.069364 | -0.2838  | -0.48543 |
| C | -2.27202 | -2.55607 | 0.504489 |
| C | -0.35802 | -4.16924 | 0.595446 |
| C | 1.025394 | -4.07472 | 0.177811 |
| C | 0.684404 | 2.861342 | 0.248143 |
| H | 2.691034 | 3.351292 | 0.661205 |
| C | 5.08642  | 1.981548 | 0.277202 |
| C | 2.938418 | -2.81858 | -1.96851 |
| C | 5.341343 | -1.02169 | -0.79218 |
| C | -2.79081 | -1.33344 | 0.166808 |
| H | -2.96917 | -3.34569 | 0.758626 |
| C | -1.01612 | -5.40209 | 1.12967  |
| C | 1.949514 | -5.05382 | 0.386158 |
| C | 0.140015 | 4.20102  | 0.26835  |
| N | -0.31274 | 1.947212 | -0.08109 |
| C | 5.518471 | 2.756816 | -0.98028 |
| H | 5.957484 | 1.446762 | 0.674197 |
| H | 4.804803 | 2.69831  | 1.055988 |
| H | 5.255358 | -2.09328 | -0.57994 |
| H | 5.640202 | -0.93076 | -1.84622 |
| C | -4.22489 | -1.06446 | 0.035003 |
| N | -2.06708 | -0.18705 | -0.11508 |
| H | -0.97864 | -6.22951 | 0.408308 |
| H | -0.52532 | -5.75581 | 2.04673  |
| C | 3.429689 | -5.08746 | 0.17455  |
| H | 1.57189  | -5.96398 | 0.848313 |
| C | 0.916568 | 5.440096 | 0.603071 |
| C | -1.17946 | 4.093638 | -0.09387 |
| C | -1.44291 | 2.678329 | -0.27868 |
| H | 4.672226 | 3.313994 | -1.40231 |
| H | 5.840254 | 2.071203 | -1.77372 |

|    |          |          |          |
|----|----------|----------|----------|
| C  | -5.31188 | -2.08306 | 0.230827 |
| C  | -4.34534 | 0.238524 | -0.34127 |
| C  | -2.99162 | 0.791744 | -0.38317 |
| H  | 3.883    | -4.09716 | 0.108569 |
| H  | 3.670076 | -5.58641 | -0.77814 |
| H  | 0.312838 | 6.340235 | 0.454916 |
| H  | 1.25276  | 5.43701  | 1.64802  |
| C  | -2.2044  | 5.185708 | -0.22254 |
| C  | -2.71082 | 2.13292  | -0.53172 |
| C  | -5.53255 | -2.96124 | -1.01377 |
| H  | -5.08551 | -2.7294  | 1.086131 |
| H  | -6.25291 | -1.58273 | 0.481859 |
| C  | -5.5877  | 1.025011 | -0.62917 |
| C  | -3.03496 | 5.378053 | 1.058949 |
| H  | -2.88409 | 4.980032 | -1.05712 |
| H  | -1.7147  | 6.133614 | -0.47062 |
| H  | -3.53315 | 2.812761 | -0.71874 |
| H  | -4.60397 | -3.46989 | -1.30194 |
| H  | -5.81267 | -2.34978 | -1.87993 |
| H  | -6.48705 | 0.416661 | -0.49762 |
| H  | -5.59171 | 1.407314 | -1.658   |
| H  | -3.53171 | 4.442177 | 1.345066 |
| H  | -2.39121 | 5.638126 | 1.907952 |
| H  | 3.744913 | -2.39904 | -2.55858 |
| Ni | -0.12726 | 0.002845 | -0.14081 |
| H  | 6.171529 | -0.63202 | -0.19235 |
| C  | 4.124395 | -5.91    | 1.256349 |
| O  | 3.590989 | -6.74017 | 1.962002 |
| O  | 5.433972 | -5.61257 | 1.298941 |
| C  | -6.60239 | -4.015   | -0.80507 |
| O  | -7.18718 | -4.23373 | 0.236457 |
| O  | -6.82938 | -4.70337 | -1.94431 |
| C  | -4.09673 | 6.450702 | 0.91727  |
| O  | -4.35365 | 7.063868 | -0.09905 |
| O  | -4.74532 | 6.645902 | 2.086059 |
| C  | 6.64359  | 3.737425 | -0.71451 |
| O  | 7.148266 | 3.962135 | 0.366942 |
| O  | 7.027463 | 4.353229 | -1.85444 |
| H  | 1.812748 | 5.538584 | -0.02195 |
| H  | -2.06632 | -5.22525 | 1.375694 |
| H  | -5.67528 | 1.894475 | 0.034734 |
| C  | 8.086521 | 5.315944 | -1.71591 |
| H  | 8.261823 | 5.704949 | -2.71917 |
| H  | 7.78822  | 6.121584 | -1.03976 |
| H  | 8.990324 | 4.840056 | -1.32626 |
| C  | -5.78594 | 7.638153 | 2.063256 |
| H  | -6.19339 | 7.658267 | 3.074233 |
| H  | -5.37848 | 8.616545 | 1.795142 |
| H  | -6.5619  | 7.365436 | 1.34303  |
| C  | -7.82228 | -5.74046 | -1.8589  |

|   |          |          |          |
|---|----------|----------|----------|
| H | -8.79203 | -5.32148 | -1.57786 |
| H | -7.87088 | -6.18162 | -2.8546  |
| H | -7.53061 | -6.49215 | -1.12066 |
| C | 6.214877 | -6.35913 | 2.253116 |
| H | 7.234334 | -5.98937 | 2.146495 |
| H | 5.845687 | -6.18365 | 3.266355 |
| H | 6.167211 | -7.42816 | 2.031498 |
| H | 2.60208  | -3.81605 | -2.22951 |

Computed geometry and energy data of singlet **7i**.

Electronic energy E = -2579.047473 a.u. Free Energy G = -2578.399753 a.u. Entropy S = 380.509 kcal/mol•K

Table S19. Atom coordinates of singlet **7i**.

|   |          |          |          |
|---|----------|----------|----------|
| N | 1.864695 | 0.517869 | -0.24491 |
| N | 0.351194 | -1.8257  | -0.20813 |
| C | 2.484738 | 1.750025 | 0.17538  |
| C | 2.830404 | -0.30757 | -0.56332 |
| C | -0.46261 | -2.85205 | 0.245075 |
| C | 1.528641 | -2.41345 | -0.55466 |
| C | 1.72302  | 2.919211 | 0.358743 |
| C | 3.860472 | 1.62011  | 0.208584 |
| C | 2.614099 | -1.6335  | -1.1346  |
| C | 4.152856 | 0.284555 | -0.24512 |
| C | -1.83602 | -2.70303 | 0.46536  |
| C | 0.253053 | -4.08357 | 0.247092 |
| C | 1.518483 | -3.80884 | -0.2724  |
| C | 0.374515 | 3.031936 | 0.119249 |
| H | 2.269267 | 3.826788 | 0.589024 |
| C | 4.869471 | 2.664444 | 0.582602 |
| C | 3.37467  | -2.04299 | -2.17735 |
| C | 5.330769 | -0.38656 | -0.27743 |
| C | -2.5575  | -1.55432 | 0.228218 |
| H | -2.38808 | -3.58908 | 0.761392 |
| C | -0.26821 | -5.41353 | 0.708657 |
| C | 2.660906 | -4.78353 | -0.39029 |
| C | -0.32792 | 4.314387 | 0.068557 |
| N | -0.50254 | 1.999901 | -0.15702 |
| C | 5.431055 | 3.417067 | -0.63823 |
| H | 5.703904 | 2.207063 | 1.127445 |
| H | 4.429467 | 3.387903 | 1.277168 |
| H | 5.38588  | -1.4283  | -0.56948 |
| C | -4.00023 | -1.45531 | 0.214865 |
| N | -1.99494 | -0.32819 | -0.1052  |
| H | 0.266481 | -6.23785 | 0.223893 |
| H | -0.15772 | -5.54906 | 1.793652 |
| C | 3.264383 | -5.15581 | 0.976774 |
| H | 3.462516 | -4.38238 | -1.01213 |
| H | 2.326741 | -5.70294 | -0.88962 |
| C | 0.313011 | 5.64374  | 0.330252 |
| C | -1.61809 | 4.041504 | -0.27178 |
| C | -1.72774 | 2.584891 | -0.37022 |

|    |          |          |          |
|----|----------|----------|----------|
| H  | 4.631632 | 3.932719 | -1.18343 |
| H  | 5.873591 | 2.716406 | -1.35808 |
| C  | -4.9512  | -2.58507 | 0.495181 |
| C  | -4.30175 | -0.16778 | -0.15826 |
| C  | -3.03813 | 0.520126 | -0.31741 |
| H  | 2.529979 | -5.63643 | 1.630982 |
| H  | 3.584675 | -4.24648 | 1.504144 |
| H  | -0.39492 | 6.463861 | 0.180005 |
| H  | 0.688634 | 5.71516  | 1.359285 |
| C  | -2.76172 | 5.000623 | -0.44383 |
| C  | -2.91283 | 1.90241  | -0.53412 |
| C  | -5.25883 | -3.42544 | -0.7571  |
| H  | -4.55193 | -3.24378 | 1.273706 |
| H  | -5.89163 | -2.19191 | 0.896669 |
| C  | -5.64985 | 0.463042 | -0.34486 |
| C  | -3.58589 | 5.177436 | 0.844195 |
| H  | -3.42565 | 4.664822 | -1.24788 |
| H  | -2.38588 | 5.979413 | -0.75969 |
| H  | -3.81925 | 2.471099 | -0.7033  |
| H  | -4.33287 | -3.82083 | -1.19446 |
| H  | -5.7149  | -2.81148 | -1.54251 |
| H  | -6.45401 | -0.23824 | -0.10253 |
| H  | -5.80533 | 0.79618  | -1.37952 |
| H  | -3.97335 | 4.213375 | 1.196285 |
| H  | -2.95983 | 5.557104 | 1.660811 |
| H  | 4.156248 | -1.41441 | -2.58894 |
| Ni | -0.09262 | 0.093956 | -0.20518 |
| H  | 6.259614 | 0.095626 | 0.013172 |
| C  | 4.47591  | -6.05877 | 0.852232 |
| O  | 5.140853 | -6.21469 | -0.15247 |
| O  | 4.751509 | -6.66936 | 2.025082 |
| C  | -6.17607 | -4.59702 | -0.46573 |
| O  | -6.53767 | -4.95563 | 0.636701 |
| O  | -6.54446 | -5.21728 | -1.60715 |
| C  | -4.75789 | 6.122083 | 0.662525 |
| O  | -5.07565 | 6.663427 | -0.3769  |
| O  | -5.42471 | 6.291423 | 1.82409  |
| C  | 6.492491 | 4.432705 | -0.26212 |
| O  | 6.955952 | 4.591043 | 0.849025 |
| O  | 6.875372 | 5.152233 | -1.33811 |
| H  | 1.167453 | 5.81778  | -0.33594 |
| H  | -1.33247 | -5.53883 | 0.479609 |
| H  | -5.7789  | 1.343963 | 0.297342 |
| C  | 7.894699 | 6.138879 | -1.09844 |
| H  | 8.075652 | 6.612584 | -2.0634  |
| H  | 7.551146 | 6.875972 | -0.36801 |
| H  | 8.807285 | 5.66585  | -0.72642 |
| C  | -6.5642  | 7.167451 | 1.767369 |
| H  | -6.9724  | 7.181979 | 2.778069 |
| H  | -6.26115 | 8.172452 | 1.462109 |

|   |          |          |          |
|---|----------|----------|----------|
| H | -7.30614 | 6.787802 | 1.059968 |
| C | -7.40073 | -6.36163 | -1.44637 |
| H | -8.33709 | -6.0754  | -0.96025 |
| H | -7.59059 | -6.72896 | -2.45505 |
| H | -6.90703 | -7.12999 | -0.84552 |
| C | 5.91398  | -7.51616 | 2.028833 |
| H | 5.981988 | -7.91547 | 3.040962 |
| H | 5.800854 | -8.32657 | 1.303964 |
| H | 6.810354 | -6.94046 | 1.783207 |
| H | 3.187333 | -2.98844 | -2.67367 |

Computed geometry and energy data of **14**.

Electronic energy E = -2579.125385 a.u. Free Energy G = -2578.472309 a.u. Entropy S = 375.556 kcal/mol•K

Table S20. Atom coordinates of **14**.

|   |          |          |          |
|---|----------|----------|----------|
| N | -1.21478 | -1.77707 | -0.10904 |
| N | 1.507862 | -1.09149 | -0.08674 |
| C | -2.58442 | -1.85244 | -0.07926 |
| C | -0.77935 | -3.09453 | -0.16512 |
| C | 2.837339 | -0.71702 | -0.03724 |
| C | 1.548922 | -2.43768 | -0.18041 |
| C | -3.44901 | -0.76437 | -0.05408 |
| C | -3.0324  | -3.23    | -0.10489 |
| C | 0.573338 | -3.4165  | -0.21487 |
| C | -1.90347 | -4.00702 | -0.16059 |
| C | 3.240648 | 0.605365 | 0.058647 |
| C | 3.720529 | -1.87971 | -0.09986 |
| C | 2.877388 | -2.95801 | -0.20477 |
| C | -3.07297 | 0.566145 | -0.04383 |
| H | -4.51251 | -0.97432 | -0.05756 |
| C | -4.46568 | -3.67946 | -0.04211 |
| C | 1.27511  | -4.76699 | -0.2781  |
| C | -1.83085 | -5.50558 | -0.20451 |
| C | 2.36365  | 1.680495 | 0.094227 |
| H | 4.304193 | 0.812478 | 0.092812 |
| C | 5.218383 | -1.81049 | -0.04017 |
| C | 2.825635 | -4.46519 | -0.31687 |
| C | -4.01295 | 1.671409 | -0.04727 |
| N | -1.77604 | 1.026062 | -0.02895 |
| C | -5.00125 | -3.75403 | 1.398924 |
| H | -4.57203 | -4.66426 | -0.50899 |
| H | -5.10861 | -3.01089 | -0.62452 |
| H | -1.30207 | -5.86538 | -1.09504 |
| H | -1.30746 | -5.91701 | 0.667381 |
| C | 2.783964 | 3.06864  | 0.171808 |
| N | 0.988384 | 1.591694 | 0.038809 |
| H | 5.649862 | -2.80659 | 0.079999 |
| H | 5.642782 | -1.36698 | -0.95137 |
| C | 3.46744  | -5.04123 | -1.59468 |
| H | 3.319612 | -4.93992 | 0.53832  |
| C | -5.50556 | 1.526878 | -0.06967 |

|    |          |          |          |
|----|----------|----------|----------|
| C  | -3.26367 | 2.816703 | -0.03275 |
| C  | -1.87307 | 2.396589 | -0.01554 |
| H  | -4.90215 | -2.78332 | 1.901855 |
| H  | -4.41379 | -4.4568  | 2.001541 |
| C  | 4.207022 | 3.538263 | 0.286891 |
| C  | 1.641522 | 3.822861 | 0.153659 |
| C  | 0.535498 | 2.888945 | 0.070984 |
| H  | 3.138897 | -4.4976  | -2.48614 |
| H  | 3.139296 | -6.08271 | -1.72446 |
| H  | -6.0004  | 2.498374 | 0.018824 |
| H  | -5.85484 | 1.063476 | -1.00149 |
| C  | -3.73864 | 4.242208 | -0.06355 |
| C  | -0.79653 | 3.269143 | 0.033903 |
| C  | 4.723208 | 3.514312 | 1.736768 |
| H  | 4.869811 | 2.927139 | -0.335   |
| H  | 4.296865 | 4.557875 | -0.10281 |
| C  | 1.500735 | 5.314901 | 0.213201 |
| C  | -3.73171 | 4.839411 | -1.48206 |
| H  | -3.12225 | 4.870612 | 0.58872  |
| H  | -4.75403 | 4.307235 | 0.341319 |
| H  | -1.01093 | 4.331362 | 0.061923 |
| H  | 4.63444  | 2.507094 | 2.164377 |
| H  | 4.116813 | 4.160987 | 2.381625 |
| H  | 2.47681  | 5.807751 | 0.182124 |
| H  | 0.997859 | 5.639314 | 1.133545 |
| H  | -2.72975 | 4.781143 | -1.92617 |
| H  | -4.38251 | 4.265354 | -2.15247 |
| H  | 0.969235 | -5.34075 | -1.16126 |
| Ni | -0.12732 | -0.05234 | -0.04698 |
| H  | -2.83235 | -5.94507 | -0.22032 |
| C  | 4.982059 | -5.08681 | -1.55586 |
| O  | 5.657081 | -5.17818 | -0.54855 |
| O  | 5.503008 | -5.06124 | -2.7978  |
| C  | 6.173408 | 3.942816 | 1.848686 |
| O  | 6.924881 | 4.145563 | 0.916526 |
| O  | 6.541855 | 4.065751 | 3.141584 |
| C  | -4.17418 | 6.289457 | -1.50848 |
| O  | -4.43014 | 6.968551 | -0.53484 |
| O  | -4.24546 | 6.749451 | -2.77573 |
| C  | -6.45884 | -4.16716 | 1.461283 |
| O  | -7.19443 | -4.31176 | 0.505901 |
| O  | -6.85389 | -4.35175 | 2.738949 |
| H  | -5.8641  | 0.898769 | 0.755327 |
| H  | 5.556167 | -1.19317 | 0.801524 |
| H  | 0.910953 | 5.700158 | -0.6279  |
| C  | -8.23011 | -4.72989 | 2.918062 |
| H  | -8.36774 | -4.83146 | 3.994674 |
| H  | -8.89551 | -3.96046 | 2.517729 |
| H  | -8.4364  | -5.67779 | 2.414179 |
| C  | -4.64478 | 8.12393  | -2.91867 |



|   |          |          |          |
|---|----------|----------|----------|
| H | -4.64544 | 8.31822  | -3.99133 |
| H | -5.64276 | 8.279332 | -2.50047 |
| H | -3.93769 | 8.784537 | -2.41004 |
| C | 7.909977 | 4.448495 | 3.36682  |
| H | 8.115556 | 5.422412 | 2.914919 |
| H | 8.025372 | 4.497601 | 4.449703 |
| H | 8.591634 | 3.706758 | 2.94227  |
| C | 6.935994 | -5.17351 | -2.87801 |
| H | 7.171331 | -5.14636 | -3.94189 |
| H | 7.41429  | -4.33977 | -2.35788 |
| H | 7.272483 | -6.11364 | -2.43348 |
| H | 1.030597 | -5.38998 | 0.59054  |

Computed geometry and energy data of **15**.

Electronic energy E = -2579.131747 a.u. Free Energy G = -2578.476933 a.u. Entropy S = 373.881 kcal/mol•K

Table S21. Atom coordinates of **15**.

|   |          |          |          |
|---|----------|----------|----------|
| N | -1.78749 | 0.367618 | -0.06166 |
| N | -0.36304 | -1.98228 | -0.1971  |
| C | -2.28705 | 1.609096 | 0.249636 |
| C | -2.89405 | -0.43475 | -0.2893  |
| C | 0.459487 | -3.07786 | -0.0603  |
| C | -1.60367 | -2.49484 | -0.49595 |
| C | -1.53952 | 2.768767 | 0.398203 |
| C | -3.72897 | 1.594677 | 0.280342 |
| C | -2.80452 | -1.79638 | -0.61114 |
| C | -4.11917 | 0.329561 | -0.0764  |
| C | 1.829072 | -3.02631 | 0.14432  |
| C | -0.27188 | -4.30961 | -0.26041 |
| C | -1.55022 | -3.93928 | -0.56766 |
| C | -0.17608 | 2.859999 | 0.205853 |
| H | -2.076   | 3.68887  | 0.59723  |
| C | -4.59442 | 2.764913 | 0.659153 |
| C | -4.03519 | -2.59811 | -1.01581 |
| C | -5.55021 | -0.12949 | -0.14877 |
| C | 2.575687 | -1.86401 | 0.099799 |
| H | 2.355235 | -3.96784 | 0.250892 |
| C | 0.302455 | -5.69162 | -0.16898 |
| C | -2.74718 | -4.76773 | -0.91534 |
| C | 0.555927 | 4.110511 | 0.162611 |
| N | 0.655917 | 1.789428 | -0.02022 |
| C | -4.74108 | 2.924789 | 2.182861 |
| H | -5.58948 | 2.661648 | 0.215613 |
| H | -4.19084 | 3.694829 | 0.245073 |
| H | -5.87533 | -0.34864 | -1.17282 |
| H | -5.73199 | -1.02911 | 0.447914 |
| C | 4.027135 | -1.82476 | 0.108381 |
| N | 2.048399 | -0.60449 | -0.06946 |
| H | -0.44186 | -6.44391 | -0.44662 |
| H | 1.166896 | -5.81967 | -0.8324  |
| C | -3.69955 | -3.91275 | -1.75559 |

|    |          |          |          |
|----|----------|----------|----------|
| H  | -3.2767  | -5.10752 | -0.01409 |
| H  | -2.4586  | -5.6751  | -1.45769 |
| C  | -0.05217 | 5.466235 | 0.36582  |
| C  | 1.855516 | 3.784886 | -0.11669 |
| C  | 1.904639 | 2.335615 | -0.19702 |
| H  | -3.75643 | 3.017129 | 2.659543 |
| H  | -5.20127 | 2.036432 | 2.631117 |
| C  | 4.925242 | -3.00984 | 0.323802 |
| C  | 4.376812 | -0.51883 | -0.1028  |
| C  | 3.136515 | 0.227082 | -0.19335 |
| H  | -3.21497 | -3.64932 | -2.70481 |
| H  | 0.714871 | 6.24558  | 0.393471 |
| H  | -0.75264 | 5.722576 | -0.43962 |
| C  | 3.026203 | 4.704735 | -0.31909 |
| C  | 3.074011 | 1.603594 | -0.31709 |
| C  | 5.087023 | -3.36803 | 1.81175  |
| H  | 4.546237 | -3.88702 | -0.21233 |
| H  | 5.914862 | -2.8118  | -0.10068 |
| C  | 5.746266 | 0.084744 | -0.20021 |
| C  | 3.334521 | 4.952821 | -1.80625 |
| H  | 3.923187 | 4.304632 | 0.166791 |
| H  | 2.834546 | 5.66721  | 0.166178 |
| H  | 4.007506 | 2.14394  | -0.42229 |
| H  | 4.112631 | -3.56859 | 2.275193 |
| H  | 5.51062  | -2.52679 | 2.373528 |
| H  | 6.520946 | -0.68743 | -0.20831 |
| H  | 5.957091 | 0.75318  | 0.644755 |
| H  | 3.530235 | 4.008766 | -2.33026 |
| H  | 2.470473 | 5.396276 | -2.316   |
| H  | -4.67527 | -1.99839 | -1.66318 |
| Ni | 0.13982  | -0.10666 | -0.09237 |
| H  | -6.21437 | 0.649095 | 0.235936 |
| C  | -4.97938 | -4.66189 | -2.09079 |
| O  | -5.34298 | -5.70275 | -1.58189 |
| O  | -5.68925 | -4.01098 | -3.03719 |
| C  | 5.969786 | -4.58186 | 2.027143 |
| O  | 6.45437  | -5.26796 | 1.150182 |
| O  | 6.153271 | -4.81787 | 3.343523 |
| C  | 4.529278 | 5.863712 | -2.01085 |
| O  | 5.221192 | 6.331005 | -1.12905 |
| O  | 4.739205 | 6.096812 | -3.32379 |
| C  | -5.56125 | 4.141016 | 2.566851 |
| O  | -5.94823 | 5.002316 | 1.803117 |
| O  | -5.80695 | 4.158624 | 3.893988 |
| H  | -0.61155 | 5.521639 | 1.307883 |
| H  | 0.640103 | -5.92533 | 0.849171 |
| H  | 5.862745 | 0.67742  | -1.11597 |
| C  | -6.55976 | 5.286507 | 4.374078 |
| H  | -6.65789 | 5.136255 | 5.449305 |
| H  | -6.03001 | 6.219471 | 4.164361 |

|   |          |          |          |
|---|----------|----------|----------|
| H | -7.54434 | 5.320553 | 3.900334 |
| C | 5.855896 | 6.948276 | -3.63543 |
| H | 5.871957 | 7.023141 | -4.72285 |
| H | 5.723293 | 7.93557  | -3.18527 |
| H | 6.787598 | 6.510266 | -3.26778 |
| C | 6.969989 | -5.95754 | 3.66494  |
| H | 7.973261 | -5.84117 | 3.246816 |
| H | 7.010982 | -5.99009 | 4.753794 |
| H | 6.522968 | -6.87409 | 3.270955 |
| C | -6.93513 | -4.62283 | -3.41633 |
| H | -7.36529 | -3.96597 | -4.17242 |
| H | -6.76123 | -5.62001 | -3.82879 |
| H | -7.60142 | -4.70392 | -2.55359 |
| H | -4.63334 | -2.85116 | -0.1278  |

Computed geometry and energy data of **16**.

Electronic energy E = -2579.123979 a.u. Free Energy G = -2578.472455 a.u. Entropy S = 379.125 kcal/mol•K

Table S22. Atom coordinates of **16**.

|   |          |          |          |
|---|----------|----------|----------|
| N | -0.74616 | -1.73355 | -0.02473 |
| N | -1.68225 | 0.895532 | -0.00586 |
| C | -0.2485  | -3.02523 | -0.04227 |
| C | -2.08773 | -1.90022 | -0.02961 |
| C | -1.88062 | 2.253525 | -0.00594 |
| C | -2.96111 | 0.347045 | 0.024694 |
| C | 1.107442 | -3.30407 | -0.01828 |
| C | -1.32582 | -4.00997 | -0.06373 |
| C | -3.1615  | -1.02918 | -0.0046  |
| C | -2.47853 | -3.27003 | -0.0543  |
| C | -0.88542 | 3.219857 | -0.04748 |
| C | -3.28774 | 2.581327 | 0.038056 |
| C | -3.96617 | 1.390619 | 0.061581 |
| C | 2.088599 | -2.32718 | 0.011984 |
| H | 1.422684 | -4.34132 | -0.01199 |
| C | -1.15011 | -5.50133 | -0.11803 |
| C | -4.44067 | -1.86396 | -0.04731 |
| C | -3.97701 | -3.36705 | -0.04051 |
| C | 0.472359 | 2.970332 | -0.06875 |
| H | -1.2047  | 4.255546 | -0.05269 |
| C | -3.84417 | 3.97453  | 0.062199 |
| C | -5.45561 | 1.207991 | 0.165376 |
| C | 3.507293 | -2.62176 | 0.054914 |
| N | 1.868645 | -0.96419 | 0.002429 |
| C | -0.9174  | -6.01948 | -1.54872 |
| H | -2.03999 | -5.98881 | 0.295639 |
| H | -0.31343 | -5.82033 | 0.513563 |
| H | -4.37636 | -3.90654 | -0.90759 |
| C | 1.488448 | 4.007433 | -0.10483 |
| N | 1.045699 | 1.719264 | -0.03465 |
| H | -4.9368  | 3.968462 | 0.013512 |
| H | -3.56004 | 4.510328 | 0.977172 |

|    |          |          |          |
|----|----------|----------|----------|
| C  | -5.93531 | 1.095683 | 1.625213 |
| H  | -5.79233 | 0.327047 | -0.38388 |
| H  | -5.96223 | 2.059399 | -0.3033  |
| C  | 4.093281 | -4.00216 | 0.08366  |
| C  | 4.154513 | -1.41648 | 0.06806  |
| C  | 3.121334 | -0.39773 | 0.030016 |
| H  | -0.0435  | -5.53195 | -2.00048 |
| H  | -1.76236 | -5.76976 | -2.2009  |
| C  | 1.220023 | 5.483733 | -0.18814 |
| C  | 2.695429 | 3.364251 | -0.08326 |
| C  | 2.401907 | 1.944971 | -0.03744 |
| H  | -5.74198 | 2.019263 | 2.180449 |
| H  | -5.37621 | 0.310088 | 2.151933 |
| H  | 5.185701 | -3.97053 | 0.039328 |
| H  | 3.81658  | -4.54183 | 0.998581 |
| C  | 5.631787 | -1.15146 | 0.14621  |
| C  | 3.375937 | 0.962375 | 0.003182 |
| C  | 0.949537 | 5.956469 | -1.62761 |
| H  | 0.367826 | 5.76003  | 0.442483 |
| H  | 2.073078 | 6.041905 | 0.211453 |
| C  | 4.074775 | 3.95262  | -0.10591 |
| C  | 6.108671 | -0.87476 | 1.583134 |
| H  | 5.90855  | -0.30317 | -0.48948 |
| H  | 6.186845 | -2.0079  | -0.25048 |
| H  | 4.410805 | 1.284141 | 0.003652 |
| H  | 0.102921 | 5.41313  | -2.06609 |
| H  | 1.80496  | 5.738828 | -2.27846 |
| H  | 4.041158 | 5.045193 | -0.06628 |
| H  | 4.62078  | 3.673036 | -1.01623 |
| H  | 5.568655 | -0.02436 | 2.018429 |
| H  | 5.890108 | -1.72616 | 2.23893  |
| H  | -5.10331 | -1.6566  | 0.799864 |
| Ni | 0.131479 | -0.01755 | -0.01685 |
| H  | -4.34972 | -3.88948 | 0.849323 |
| C  | -7.40789 | 0.748648 | 1.72944  |
| O  | -8.07186 | 0.228597 | 0.855159 |
| O  | -7.89894 | 1.068875 | 2.944629 |
| C  | 0.650774 | 7.44072  | -1.70968 |
| O  | 0.557756 | 8.196905 | -0.76406 |
| O  | 0.491338 | 7.830315 | -2.99236 |
| C  | 7.593881 | -0.57958 | 1.66059  |
| O  | 8.348319 | -0.49302 | 0.712965 |
| O  | 7.98658  | -0.41519 | 2.941707 |
| C  | -0.69251 | -7.51814 | -1.59981 |
| O  | -0.54606 | -8.24435 | -0.63762 |
| O  | -0.66251 | -7.9589  | -2.87561 |
| H  | 3.747151 | -4.60718 | -0.76361 |
| H  | -3.48231 | 4.570844 | -0.78469 |
| H  | 4.67517  | 3.611037 | 0.74656  |
| C  | -0.43013 | -9.36852 | -3.04317 |

|   |          |          |          |
|---|----------|----------|----------|
| H | -0.44058 | -9.54068 | -4.11956 |
| H | 0.536997 | -9.65178 | -2.61939 |
| H | -1.21761 | -9.94824 | -2.55456 |
| C | 9.380986 | -0.1191  | 3.133745 |
| H | 9.513084 | -0.01946 | 4.211232 |
| H | 10.00289 | -0.92965 | 2.744846 |
| H | 9.649506 | 0.811623 | 2.627106 |
| C | 0.192756 | 9.22361  | -3.18864 |
| H | 0.999997 | 9.848263 | -2.7973  |
| H | 0.097761 | 9.353255 | -4.26684 |
| H | -0.74092 | 9.490935 | -2.68681 |
| C | -9.27968 | 0.731357 | 3.168322 |
| H | -9.49901 | 1.057053 | 4.185206 |
| H | -9.92191 | 1.25033  | 2.452163 |
| H | -9.4324  | -0.34659 | 3.069608 |
| H | -5.02213 | -1.64949 | -0.95168 |

Computed geometry and energy data of **3a**.

Electronic energy E = -1832.161079 a.u. Free Energy G = -1831.650903 a.u. Entropy S = 284.861 kcal/mol•K

Table S23. Atom coordinates of **3a**.

|   |          |          |          |
|---|----------|----------|----------|
| N | 1.043711 | 0.677634 | -0.11822 |
| C | 1.35416  | 1.982603 | -0.17994 |
| C | 2.191855 | -0.05455 | -0.13464 |
| C | 2.854366 | 2.224429 | -0.35712 |
| C | 0.431142 | 3.030921 | -0.13074 |
| C | 3.4392   | 0.819101 | -0.06154 |
| C | 2.17648  | -1.43756 | -0.19469 |
| C | 3.185579 | 2.738984 | -1.76937 |
| H | 3.206344 | 2.964766 | 0.372708 |
| C | -0.96225 | 2.949373 | -0.03288 |
| H | 0.840957 | 4.034465 | -0.18001 |
| C | 4.112663 | 0.721872 | 1.328127 |
| H | 4.168286 | 0.514995 | -0.82069 |
| C | 3.357087 | -2.40203 | -0.29754 |
| C | 1.018575 | -2.23888 | -0.20977 |
| H | 4.266791 | 2.87765  | -1.88593 |
| H | 2.850461 | 2.027113 | -2.53242 |
| H | 2.69739  | 3.699306 | -1.9686  |
| N | -1.69283 | 1.787909 | -0.00165 |
| C | -1.89291 | 4.043038 | 0.058111 |
| C | 5.461378 | 1.443154 | 1.417203 |
| H | 3.434008 | 1.142088 | 2.080751 |
| H | 4.26186  | -0.32952 | 1.590331 |
| C | 2.727085 | -3.82528 | -0.3631  |
| H | 3.970601 | -2.23519 | -1.19231 |
| H | 4.04769  | -2.35383 | 0.55291  |
| N | -0.31227 | -2.05888 | -0.15501 |
| C | 1.275445 | -3.63092 | -0.29964 |
| C | -3.04377 | 2.049676 | 0.073995 |
| H | -1.28426 | 0.863672 | -0.0537  |

|   |          |          |          |
|---|----------|----------|----------|
| C | -1.51873 | 5.494597 | 0.115085 |
| C | -3.16831 | 3.496432 | 0.120565 |
| C | 6.561565 | 0.756749 | 0.627929 |
| H | 5.395475 | 2.4854   | 1.082859 |
| H | 5.797598 | 1.491198 | 2.461625 |
| O | 3.360869 | -4.86593 | -0.44942 |
| C | -0.95082 | -3.29621 | -0.20501 |
| H | -0.85121 | -1.19909 | -0.08722 |
| C | 0.058362 | -4.31281 | -0.29845 |
| C | -4.06968 | 1.119056 | 0.079626 |
| H | -0.49261 | 5.627353 | 0.46951  |
| H | -1.59178 | 5.986292 | -0.86435 |
| H | -2.17026 | 6.041965 | 0.804143 |
| C | -4.45    | 4.157345 | 0.22582  |
| O | 7.672037 | 1.521648 | 0.584382 |
| O | 6.484641 | -0.33947 | 0.110179 |
| C | -2.34408 | -3.40007 | -0.16427 |
| C | -0.16683 | -5.79138 | -0.37762 |
| C | -3.99332 | -0.28867 | 0.028361 |
| H | -5.07255 | 1.53212  | 0.113307 |
| H | -5.34167 | 3.651594 | 0.574993 |
| C | 8.797091 | 0.951089 | -0.11    |
| C | -3.23433 | -2.32318 | -0.07807 |
| H | -2.75982 | -4.40193 | -0.20548 |
| H | -0.767   | -6.06119 | -1.25555 |
| H | 0.790411 | -6.31364 | -0.44494 |
| H | -0.69972 | -6.16576 | 0.505454 |
| C | -5.17056 | -1.16029 | 0.030406 |
| N | -2.84635 | -1.00598 | -0.03518 |
| H | 9.1015   | 0.012323 | 0.359477 |
| H | 8.545349 | 0.762705 | -1.15674 |
| H | 9.592548 | 1.692546 | -0.0352  |
| C | -4.69255 | -2.44202 | -0.03639 |
| C | -6.59498 | -0.69488 | 0.097085 |
| C | -5.46621 | -3.73117 | -0.0265  |
| H | -6.82674 | 0.022241 | -0.701   |
| H | -7.29347 | -1.53111 | -0.00271 |
| H | -6.81747 | -0.19695 | 1.050383 |
| C | -5.57502 | -4.36973 | 1.372234 |
| H | -5.00162 | -4.44994 | -0.71414 |
| H | -6.47582 | -3.55614 | -0.41736 |
| H | -4.58397 | -4.5828  | 1.787728 |
| H | -6.08802 | -3.69762 | 2.068868 |
| H | -6.13634 | -5.31037 | 1.328978 |
| N | -4.64586 | 5.396658 | -0.12798 |
| N | -4.84632 | 6.481598 | -0.43776 |

Computed geometry and energy data of **3b**.

Electronic energy E = -1722.594395 a.u. Free Energy G = -1722.090671 a.u. Entropy S = 270.491 kcal/mol•K  
Table S24. Atom coordinates of **3b**.

|   |          |          |          |
|---|----------|----------|----------|
| N | 0.963161 | 0.848248 | -0.17219 |
| C | 1.501185 | 2.088894 | -0.2311  |
| C | 1.959657 | -0.06433 | -0.1687  |
| C | 3.021025 | 2.056336 | -0.39757 |
| C | 0.769612 | 3.267883 | -0.18964 |
| C | 3.341056 | 0.573295 | -0.07717 |
| C | 1.707633 | -1.43418 | -0.22304 |
| C | 3.446519 | 2.47974  | -1.81474 |
| H | 3.497318 | 2.73116  | 0.324665 |
| C | -0.62728 | 3.416988 | -0.09693 |
| H | 1.332347 | 4.195436 | -0.23353 |
| C | 3.9532   | 0.376246 | 1.33101  |
| H | 4.020388 | 0.133692 | -0.81604 |
| C | 2.720474 | -2.57471 | -0.31647 |
| C | 0.439899 | -2.03023 | -0.2366  |
| H | 4.535626 | 2.421365 | -1.92468 |
| H | 2.99326  | 1.82757  | -2.57008 |
| H | 3.137768 | 3.508423 | -2.03044 |
| N | -1.54417 | 2.378094 | -0.05987 |
| C | -1.36045 | 4.629513 | -0.03198 |
| C | 5.413275 | 0.826719 | 1.439466 |
| H | 3.351941 | 0.934575 | 2.059098 |
| H | 3.892666 | -0.67831 | 1.615232 |
| C | 1.871172 | -3.87803 | -0.36507 |
| H | 3.346762 | -2.51701 | -1.21624 |
| H | 3.416436 | -2.62377 | 0.529115 |
| N | -0.84745 | -1.63826 | -0.18615 |
| C | 0.466994 | -3.4505  | -0.31068 |
| C | -2.82301 | 2.839773 | 0.018183 |
| H | -1.26933 | 1.403325 | -0.0975  |
| C | -0.76185 | 5.998072 | -0.04298 |
| C | -2.74366 | 4.299206 | 0.043277 |
| C | 6.373861 | -0.08071 | 0.691973 |
| H | 5.557516 | 1.853698 | 1.083648 |
| H | 5.730305 | 0.832733 | 2.490967 |
| O | 2.324806 | -5.00851 | -0.43458 |
| C | -1.67493 | -2.75499 | -0.22068 |
| H | -1.25016 | -0.70493 | -0.12711 |
| C | -0.83775 | -3.92734 | -0.30322 |
| C | -4.00294 | 2.099463 | 0.057565 |
| H | -0.07111 | 6.14071  | 0.797496 |
| H | -0.19219 | 6.179589 | -0.96318 |
| H | -1.5402  | 6.762314 | 0.026778 |
| C | -3.89226 | 5.104569 | 0.123775 |
| O | 7.604851 | 0.465674 | 0.630153 |
| O | 6.099014 | -1.16611 | 0.219993 |
| C | -3.06364 | -2.63709 | -0.16984 |
| C | -1.30107 | -5.349   | -0.36557 |
| C | -4.16973 | 0.71151  | 0.019875 |
| H | -4.89025 | 2.722642 | 0.117653 |

|   |          |          |          |
|---|----------|----------|----------|
| H | -3.64186 | 6.180381 | 0.136836 |
| C | 8.61123  | -0.33101 | -0.02328 |
| C | -3.76167 | -1.42139 | -0.08272 |
| H | -3.63861 | -3.55681 | -0.19772 |
| H | -1.92776 | -5.52832 | -1.24808 |
| H | -0.44188 | -6.02193 | -0.41341 |
| H | -1.89897 | -5.61546 | 0.514841 |
| C | -5.47912 | 0.046038 | 0.050035 |
| N | -3.1581  | -0.1964  | -0.05793 |
| H | 8.740242 | -1.28472 | 0.494434 |
| H | 8.332566 | -0.52227 | -1.06259 |
| H | 9.526662 | 0.258509 | 0.025609 |
| C | -5.22357 | -1.29494 | -0.01631 |
| C | -6.79979 | 0.749204 | 0.13892  |
| C | -6.19833 | -2.43886 | 0.012385 |
| H | -6.9158  | 1.493301 | -0.65878 |
| H | -7.63381 | 0.045568 | 0.060054 |
| H | -6.90914 | 1.284468 | 1.091038 |
| C | -6.37582 | -3.05769 | 1.413066 |
| H | -5.87608 | -3.22053 | -0.68819 |
| H | -7.17407 | -2.09618 | -0.35181 |
| H | -5.42453 | -3.43597 | 1.80337  |
| H | -6.75205 | -2.31303 | 2.12288  |
| H | -7.08712 | -3.89108 | 1.382513 |

Computed geometry and energy data of **3c**.

Electronic energy E = -1722.597605 a.u. Free Energy G = -1722.096893 a.u. Entropy S = 275.093 kcal/mol•K

Table S25. Atom coordinates of **3c**.

|   |          |          |          |
|---|----------|----------|----------|
| N | 0.960789 | 0.830903 | -0.16066 |
| C | 1.497272 | 2.064484 | -0.22759 |
| C | 1.962564 | -0.08881 | -0.15988 |
| C | 3.017918 | 2.034679 | -0.39564 |
| C | 0.773835 | 3.254991 | -0.19166 |
| C | 3.342303 | 0.553637 | -0.07232 |
| C | 1.711374 | -1.45052 | -0.21365 |
| C | 3.440372 | 2.456234 | -1.81428 |
| H | 3.492594 | 2.713453 | 0.324285 |
| C | -0.6188  | 3.420152 | -0.10084 |
| H | 1.351198 | 4.172857 | -0.23604 |
| C | 3.959525 | 0.36181  | 1.333941 |
| H | 4.021336 | 0.114931 | -0.81214 |
| C | 2.715303 | -2.59875 | -0.30124 |
| C | 0.435954 | -2.04845 | -0.23082 |
| H | 4.529651 | 2.402167 | -1.92528 |
| H | 2.989282 | 1.79949  | -2.56698 |
| H | 3.126977 | 3.482814 | -2.03347 |
| N | -1.53797 | 2.385713 | -0.05848 |
| C | -1.33712 | 4.642666 | -0.0446  |
| C | 5.416348 | 0.823713 | 1.439702 |
| H | 3.355611 | 0.914901 | 2.063912 |



|   |          |          |          |
|---|----------|----------|----------|
| H | 3.907869 | -0.69346 | 1.617064 |
| C | 1.857407 | -3.89797 | -0.35492 |
| H | 3.348459 | -2.54584 | -1.19654 |
| H | 3.404732 | -2.65333 | 0.549576 |
| N | -0.84755 | -1.65029 | -0.18355 |
| C | 0.45907  | -3.46384 | -0.30519 |
| C | -2.82669 | 2.848297 | 0.019132 |
| H | -1.27148 | 1.409263 | -0.0955  |
| C | -0.76375 | 6.023916 | -0.04303 |
| C | -2.7281  | 4.31804  | 0.040397 |
| C | 6.382603 | -0.07538 | 0.689634 |
| H | 5.552038 | 1.852197 | 1.085095 |
| H | 5.735973 | 0.830198 | 2.490574 |
| O | 2.30968  | -5.03092 | -0.42418 |
| C | -1.68051 | -2.76552 | -0.22094 |
| H | -1.24223 | -0.71395 | -0.12429 |
| C | -0.85589 | -3.93491 | -0.30141 |
| C | -3.99531 | 2.114889 | 0.057756 |
| H | -0.66889 | 6.424931 | 0.975826 |
| H | 0.229576 | 6.053594 | -0.50025 |
| H | -1.4053  | 6.714118 | -0.60232 |
| C | -3.7851  | 5.175215 | 0.123853 |
| O | 7.604238 | 0.490778 | 0.607084 |
| O | 6.121212 | -1.1703  | 0.232802 |
| C | -3.0752  | -2.63336 | -0.17214 |
| C | -1.32078 | -5.35733 | -0.36579 |
| C | -4.1629  | 0.712098 | 0.018566 |
| H | -4.90035 | 2.711705 | 0.117959 |
| H | -3.92936 | 6.245859 | 0.165724 |
| C | 8.615192 | -0.29736 | -0.04903 |
| C | -3.76711 | -1.42382 | -0.08576 |
| H | -3.65421 | -3.55105 | -0.20135 |
| H | -1.94648 | -5.53788 | -1.24886 |
| H | -0.46112 | -6.02988 | -0.41424 |
| H | -1.918   | -5.62736 | 0.51414  |
| C | -5.47369 | 0.054458 | 0.046235 |
| N | -3.15868 | -0.18794 | -0.05805 |
| H | 8.765728 | -1.24289 | 0.477882 |
| H | 8.327405 | -0.5055  | -1.08263 |
| H | 9.521757 | 0.307006 | -0.01818 |
| C | -5.22432 | -1.2896  | -0.02171 |
| C | -6.79388 | 0.760307 | 0.133807 |
| C | -6.20743 | -2.42673 | 0.005259 |
| H | -6.9128  | 1.500561 | -0.66779 |
| H | -7.62883 | 0.057215 | 0.058024 |
| H | -6.90515 | 1.298764 | 1.084419 |
| C | -6.40285 | -3.03536 | 1.407972 |
| H | -5.88374 | -3.21556 | -0.68643 |
| H | -7.17772 | -2.08076 | -0.37091 |
| H | -5.45759 | -3.41775 | 1.808535 |

|   |          |          |          |
|---|----------|----------|----------|
| H | -6.77965 | -2.28348 | 2.109995 |
| H | -7.12012 | -3.86378 | 1.376676 |

Computed geometry and energy data of **3d**.

Electronic energy E = -2032.313158 a.u. Free Energy G = -2031.691362 a.u. Entropy S = 322.476 kcal/mol•K

Table S26. Atom coordinates of **3d**.

|   |          |          |          |
|---|----------|----------|----------|
| C | -4.52513 | -1.60187 | -1.13567 |
| C | -5.38346 | -2.83401 | -1.32851 |
| C | -6.856   | -2.57127 | -1.17057 |
| C | -7.50822 | -2.33743 | 0.06426  |
| C | -6.81782 | -2.31854 | 1.312055 |
| C | -8.91655 | -2.11235 | 0.096492 |
| C | -7.49688 | -2.09239 | 2.501461 |
| C | -9.58407 | -1.88845 | 1.290367 |
| C | -8.8816  | -1.87687 | 2.504516 |
| H | -5.05469 | -0.65742 | -1.22084 |
| H | -5.0636  | -3.62191 | -0.63294 |
| H | -5.21113 | -3.24492 | -2.3352  |
| H | -5.74336 | -2.47315 | 1.330781 |
| H | -9.46721 | -2.12098 | -0.84131 |
| H | -6.94618 | -2.08098 | 3.438585 |
| H | -10.6581 | -1.72108 | 1.283967 |
| H | -9.40627 | -1.70074 | 3.439166 |
| H | -7.46443 | -2.55007 | -2.07156 |
| N | 1.81394  | -0.77753 | -0.0175  |
| C | 1.546514 | -2.09594 | -0.07259 |
| C | 3.151927 | -0.60413 | 0.159637 |
| C | 2.783532 | -2.9572  | 0.195005 |
| C | 0.292024 | -2.65565 | -0.30524 |
| C | 3.925224 | -1.91538 | 0.080596 |
| C | 3.708747 | 0.647023 | 0.366796 |
| C | 2.71485  | -3.63635 | 1.574351 |
| H | 2.875755 | -3.73681 | -0.57192 |
| C | -0.93643 | -2.00203 | -0.50818 |
| H | 0.253165 | -3.73951 | -0.3287  |
| C | 4.712399 | -2.02085 | -1.2476  |
| H | 4.63509  | -1.99666 | 0.911408 |
| C | 5.163767 | 1.009627 | 0.657951 |
| C | 2.997036 | 1.862426 | 0.381553 |
| H | 3.619866 | -4.22645 | 1.760463 |
| H | 2.626102 | -2.89015 | 2.372289 |
| H | 1.851523 | -4.30708 | 1.644684 |
| N | -1.1173  | -0.63133 | -0.47129 |
| C | -2.19656 | -2.60042 | -0.77494 |
| C | 5.652362 | -3.22851 | -1.31791 |
| H | 3.998415 | -2.07564 | -2.07871 |
| H | 5.301923 | -1.11178 | -1.39793 |
| C | 5.180613 | 2.559063 | 0.82476  |
| H | 5.546317 | 0.542633 | 1.574834 |
| H | 5.861955 | 0.723164 | -0.13759 |

|   |          |          |          |
|---|----------|----------|----------|
| N | 1.727294 | 2.267848 | 0.207902 |
| C | 3.797815 | 3.003288 | 0.63602  |
| C | -2.42635 | -0.28436 | -0.68448 |
| H | -0.36804 | 0.025552 | -0.28875 |
| C | -2.42658 | -4.07568 | -0.91652 |
| C | -3.16022 | -1.55129 | -0.88827 |
| C | 6.854334 | -3.10395 | -0.39909 |
| H | 5.136712 | -4.1686  | -1.08877 |
| H | 6.040675 | -3.34764 | -2.33842 |
| O | 6.177572 | 3.223973 | 1.06475  |
| C | 1.661717 | 3.652639 | 0.33813  |
| H | 0.890309 | 1.724851 | 0.007302 |
| C | 2.981058 | 4.137238 | 0.614519 |
| C | -2.95009 | 0.993878 | -0.68799 |
| H | -3.04891 | -4.30565 | -1.7871  |
| H | -1.48482 | -4.61581 | -1.04397 |
| H | -2.92823 | -4.50352 | -0.03777 |
| O | 7.530584 | -4.26932 | -0.32826 |
| O | 7.194513 | -2.09745 | 0.189924 |
| C | 0.447242 | 4.338163 | 0.193609 |
| C | 3.386363 | 5.562873 | 0.83204  |
| C | -2.29455 | 2.229491 | -0.47833 |
| H | -4.01735 | 1.060532 | -0.86701 |
| C | 8.717262 | -4.25442 | 0.487183 |
| C | -0.78521 | 3.745303 | -0.083   |
| H | 0.479254 | 5.417309 | 0.30562  |
| H | 2.860226 | 6.006629 | 1.68653  |
| H | 4.460191 | 5.620729 | 1.025592 |
| H | 3.162648 | 6.185086 | -0.04366 |
| C | -2.99699 | 3.517916 | -0.49387 |
| N | -0.97615 | 2.387745 | -0.2338  |
| H | 9.435691 | -3.52463 | 0.105463 |
| H | 8.467965 | -4.00396 | 1.521387 |
| H | 9.126358 | -5.26286 | 0.425308 |
| C | -2.04726 | 4.470547 | -0.24322 |
| C | -4.46479 | 3.701526 | -0.74097 |
| C | -2.21282 | 5.963605 | -0.18044 |
| H | -5.07218 | 3.110814 | -0.04309 |
| H | -4.76099 | 4.748733 | -0.62753 |
| H | -4.7495  | 3.390127 | -1.75495 |
| C | -1.86804 | 6.675144 | -1.5037  |
| H | -1.58625 | 6.374721 | 0.621946 |
| H | -3.24622 | 6.206144 | 0.095167 |
| H | -0.83187 | 6.478618 | -1.80017 |
| H | -2.5162  | 6.325194 | -2.31464 |
| H | -1.99569 | 7.759714 | -1.40778 |

Computed geometry and energy data of **3e**.  
 Electronic energy E = -2032.2845701 a.u.  
 Table S27. Atom coordinates of **3e**.

---

|   |          |          |          |
|---|----------|----------|----------|
| C | -4.52513 | -1.60187 | -1.13567 |
| C | -5.38346 | -2.83401 | -1.32851 |
| C | -6.856   | -2.57127 | -1.17057 |
| C | -7.50822 | -2.33743 | 0.06426  |
| C | -6.81782 | -2.31854 | 1.312055 |
| C | -8.91655 | -2.11235 | 0.096492 |
| C | -7.49688 | -2.09239 | 2.501461 |
| C | -9.58407 | -1.88845 | 1.290367 |
| C | -8.8816  | -1.87687 | 2.504516 |
| H | -5.05469 | -0.65742 | -1.22084 |
| H | -5.0636  | -3.62191 | -0.63294 |
| H | -5.21113 | -3.24492 | -2.3352  |
| H | -5.74336 | -2.47315 | 1.330781 |
| H | -9.46721 | -2.12098 | -0.84131 |
| H | -6.94618 | -2.08098 | 3.438585 |
| H | -10.6581 | -1.72108 | 1.283967 |
| H | -9.40627 | -1.70074 | 3.439166 |
| H | -7.46443 | -2.55007 | -2.07156 |
| N | 1.81394  | -0.77753 | -0.0175  |
| C | 1.546514 | -2.09594 | -0.07259 |
| C | 3.151927 | -0.60413 | 0.159637 |
| C | 2.783532 | -2.9572  | 0.195005 |
| C | 0.292024 | -2.65565 | -0.30524 |
| C | 3.925224 | -1.91538 | 0.080596 |
| C | 3.708747 | 0.647023 | 0.366796 |
| C | 2.71485  | -3.63635 | 1.574351 |
| H | 2.875755 | -3.73681 | -0.57192 |
| C | -0.93643 | -2.00203 | -0.50818 |
| H | 0.253165 | -3.73951 | -0.3287  |
| C | 4.712399 | -2.02085 | -1.2476  |
| H | 4.63509  | -1.99666 | 0.911408 |
| C | 5.163767 | 1.009627 | 0.657951 |
| C | 2.997036 | 1.862426 | 0.381553 |
| H | 3.619866 | -4.22645 | 1.760463 |
| H | 2.626102 | -2.89015 | 2.372289 |
| H | 1.851523 | -4.30708 | 1.644684 |
| N | -1.1173  | -0.63133 | -0.47129 |
| C | -2.19656 | -2.60042 | -0.77494 |
| C | 5.652362 | -3.22851 | -1.31791 |
| H | 3.998415 | -2.07564 | -2.07871 |
| H | 5.301923 | -1.11178 | -1.39793 |
| C | 5.180613 | 2.559063 | 0.82476  |
| H | 5.546317 | 0.542633 | 1.574834 |
| H | 5.861955 | 0.723164 | -0.13759 |
| N | 1.727294 | 2.267848 | 0.207902 |
| C | 3.797815 | 3.003288 | 0.63602  |
| C | -2.42635 | -0.28436 | -0.68448 |
| H | -0.36804 | 0.025552 | -0.28875 |
| C | -2.42658 | -4.07568 | -0.91652 |
| C | -3.16022 | -1.55129 | -0.88827 |

|   |          |          |          |
|---|----------|----------|----------|
| C | 6.854334 | -3.10395 | -0.39909 |
| H | 5.136712 | -4.1686  | -1.08877 |
| H | 6.040675 | -3.34764 | -2.33842 |
| O | 6.177572 | 3.223973 | 1.06475  |
| C | 1.661717 | 3.652639 | 0.33813  |
| H | 0.890309 | 1.724851 | 0.007302 |
| C | 2.981058 | 4.137238 | 0.614519 |
| C | -2.95009 | 0.993878 | -0.68799 |
| H | -3.04891 | -4.30565 | -1.7871  |
| H | -1.48482 | -4.61581 | -1.04397 |
| H | -2.92823 | -4.50352 | -0.03777 |
| O | 7.530584 | -4.26932 | -0.32826 |
| O | 7.194513 | -2.09745 | 0.189924 |
| C | 0.447242 | 4.338163 | 0.193609 |
| C | 3.386363 | 5.562873 | 0.83204  |
| C | -2.29455 | 2.229491 | -0.47833 |
| H | -4.01735 | 1.060532 | -0.86701 |
| C | 8.717262 | -4.25442 | 0.487183 |
| C | -0.78521 | 3.745303 | -0.083   |
| H | 0.479254 | 5.417309 | 0.30562  |
| H | 2.860226 | 6.006629 | 1.68653  |
| H | 4.460191 | 5.620729 | 1.025592 |
| H | 3.162648 | 6.185086 | -0.04366 |
| C | -2.99699 | 3.517916 | -0.49387 |
| N | -0.97615 | 2.387745 | -0.2338  |
| H | 9.435691 | -3.52463 | 0.105463 |
| H | 8.467965 | -4.00396 | 1.521387 |
| H | 9.126358 | -5.26286 | 0.425308 |
| C | -2.04726 | 4.470547 | -0.24322 |
| C | -4.46479 | 3.701526 | -0.74097 |
| C | -2.21282 | 5.963605 | -0.18044 |
| H | -5.07218 | 3.110814 | -0.04309 |
| H | -4.76099 | 4.748733 | -0.62753 |
| H | -4.7495  | 3.390127 | -1.75495 |
| C | -1.86804 | 6.675144 | -1.5037  |
| H | -1.58625 | 6.374721 | 0.621946 |
| H | -3.24622 | 6.206144 | 0.095167 |
| H | -0.83187 | 6.478618 | -1.80017 |
| H | -2.5162  | 6.325194 | -2.31464 |
| H | -1.99569 | 7.759714 | -1.40778 |

Computed geometry and energy data of **3f**.

Electronic energy E = -1723.282429 a.u. Free Energy G = -1722.768201 a.u. Entropy S = 274.448 kcal/mol•K

Table S28. Atom coordinates of **3f**.

|   |          |          |          |
|---|----------|----------|----------|
| N | 0.965579 | 0.82103  | -0.17018 |
| C | 1.485621 | 2.062316 | -0.24025 |
| C | 1.979746 | -0.08422 | -0.17058 |
| C | 3.006055 | 2.050699 | -0.41748 |
| C | 0.74927  | 3.243427 | -0.20157 |
| C | 3.350398 | 0.577022 | -0.08406 |

|   |          |          |          |
|---|----------|----------|----------|
| C | 1.747645 | -1.44956 | -0.22175 |
| C | 3.411755 | 2.46458  | -1.84324 |
| H | 3.477841 | 2.741496 | 0.292886 |
| C | -0.64513 | 3.4      | -0.10249 |
| H | 1.318993 | 4.165538 | -0.25398 |
| C | 3.961655 | 0.402193 | 1.327182 |
| H | 4.038934 | 0.142412 | -0.81747 |
| C | 2.765629 | -2.58509 | -0.30931 |
| C | 0.480129 | -2.06315 | -0.23495 |
| H | 4.500713 | 2.424166 | -1.96305 |
| H | 2.963064 | 1.795088 | -2.58608 |
| H | 3.082238 | 3.484742 | -2.06869 |
| N | -1.55776 | 2.356841 | -0.05745 |
| C | -1.37471 | 4.612041 | -0.0391  |
| C | 5.414338 | 0.875433 | 1.437892 |
| H | 3.349626 | 0.957299 | 2.048866 |
| H | 3.915284 | -0.65094 | 1.619444 |
| C | 1.923286 | -3.89512 | -0.35853 |
| H | 3.39554  | -2.52622 | -1.20656 |
| H | 3.458484 | -2.62804 | 0.539385 |
| N | -0.80746 | -1.67915 | -0.18624 |
| C | 0.519814 | -3.47791 | -0.30682 |
| C | -2.85041 | 2.810513 | 0.023898 |
| H | -1.28611 | 1.382    | -0.0968  |
| C | -0.82369 | 6.002144 | -0.05237 |
| C | -2.76128 | 4.281334 | 0.045853 |
| C | 6.391946 | -0.02225 | 0.701037 |
| H | 5.545019 | 1.902208 | 1.076111 |
| H | 5.727504 | 0.892657 | 2.490586 |
| O | 2.389161 | -5.02262 | -0.42705 |
| C | -1.62744 | -2.80362 | -0.22062 |
| H | -1.21091 | -0.74655 | -0.1278  |
| C | -0.79018 | -3.96371 | -0.30033 |
| C | -4.0036  | 2.05318  | 0.063564 |
| H | -1.08614 | 6.543953 | 0.866119 |
| H | 0.265434 | 6.01466  | -0.14045 |
| H | -1.22958 | 6.58282  | -0.89123 |
| C | -3.81607 | 5.163254 | 0.131646 |
| O | 7.611158 | 0.550378 | 0.625876 |
| O | 6.140969 | -1.12106 | 0.247805 |
| C | -3.02386 | -2.68618 | -0.17027 |
| C | -1.23901 | -5.39149 | -0.36075 |
| C | -4.14897 | 0.646645 | 0.022951 |
| H | -4.92664 | 2.620419 | 0.12492  |
| H | -3.64765 | 6.234577 | 0.139099 |
| C | 8.631858 | -0.23532 | -0.01787 |
| C | -3.72849 | -1.48477 | -0.08377 |
| H | -3.59271 | -3.61024 | -0.19821 |
| H | -1.8764  | -5.57802 | -1.23412 |
| H | -0.37193 | -6.05325 | -0.42367 |

|   |          |          |          |
|---|----------|----------|----------|
| H | -1.81877 | -5.67075 | 0.528019 |
| C | -5.45206 | -0.0273  | 0.05125  |
| N | -3.13468 | -0.24058 | -0.05551 |
| H | 8.781904 | -1.17835 | 0.51367  |
| H | 8.354761 | -0.44852 | -1.05339 |
| H | 9.535284 | 0.373385 | 0.01928  |
| C | -5.1869  | -1.36795 | -0.0189  |
| C | -6.7815  | 0.660948 | 0.140284 |
| C | -6.15684 | -2.51641 | 0.004173 |
| H | -6.91776 | 1.389362 | -0.66959 |
| H | -7.60657 | -0.05517 | 0.079539 |
| H | -6.89413 | 1.208832 | 1.085402 |
| C | -6.34951 | -3.12945 | 1.405359 |
| H | -5.82199 | -3.30035 | -0.68772 |
| H | -7.12988 | -2.18094 | -0.37457 |
| H | -5.40139 | -3.50279 | 1.807713 |
| H | -6.73577 | -2.3827  | 2.107758 |
| H | -7.05818 | -3.96509 | 1.37081  |
| H | -4.84512 | 4.828104 | 0.195813 |

Computed geometry and energy data of **9**.

Electronic energy E = -2032.36544 a.u. Free Energy G = -2031.734115 a.u. Entropy S = 312.114 kcal/mol•K

Table S29. Atom coordinates of **9**.

|   |          |          |          |
|---|----------|----------|----------|
| O | -5.46135 | 4.130095 | -0.59067 |
| O | -7.51861 | -0.94099 | 0.100832 |
| O | -8.23068 | -3.04198 | 0.521986 |
| N | 1.442287 | 1.782926 | 0.056173 |
| N | 0.942922 | -1.19132 | 0.097564 |
| H | 0.33769  | -0.38339 | 0.029874 |
| N | -1.25801 | 2.232176 | -0.16166 |
| H | -0.53793 | 1.520398 | -0.06349 |
| N | -1.96746 | -0.74409 | -0.09077 |
| C | 2.718119 | 1.344759 | 0.184248 |
| C | 3.664858 | 2.462519 | 0.233952 |
| C | 2.912119 | 3.601123 | 0.121941 |
| C | 1.522555 | 3.153756 | 0.012256 |
| C | 0.416307 | 3.999438 | -0.12837 |
| H | 0.596416 | 5.06905  | -0.17035 |
| C | -0.91571 | 3.581725 | -0.21543 |
| C | -2.12528 | 4.34095  | -0.35377 |
| C | -3.15589 | 3.400016 | -0.37331 |
| C | -2.59327 | 2.104066 | -0.25153 |
| C | -4.61145 | 3.260708 | -0.47055 |
| C | -4.90604 | 1.733332 | -0.39003 |
| H | -5.4421  | 1.419858 | -1.29527 |
| H | -5.58971 | 1.540825 | 0.445372 |
| C | -3.54151 | 1.061755 | -0.24218 |
| C | -3.24997 | -0.28736 | -0.14535 |
| C | -4.27056 | -1.41744 | -0.06367 |
| H | -5.03793 | -1.30335 | -0.83774 |

|   |          |          |          |
|---|----------|----------|----------|
| C | -3.37997 | -2.66175 | -0.31633 |
| H | -3.57344 | -3.44814 | 0.424443 |
| C | -1.97659 | -2.08534 | -0.12126 |
| C | -0.83781 | -2.89323 | -0.029   |
| H | -0.9999  | -3.96658 | -0.04933 |
| C | 0.493457 | -2.48498 | 0.081846 |
| C | 1.656322 | -3.33773 | 0.19407  |
| C | 2.769059 | -2.52277 | 0.254006 |
| C | 2.317438 | -1.14676 | 0.200828 |
| C | 3.10877  | -0.00906 | 0.24545  |
| H | 4.173564 | -0.19854 | 0.33175  |
| C | 5.150869 | 2.336215 | 0.392839 |
| H | 5.649208 | 3.301723 | 0.261644 |
| H | 5.584892 | 1.638655 | -0.33413 |
| H | 5.422544 | 1.962059 | 1.389009 |
| C | 3.371676 | 5.032453 | 0.148346 |
| H | 4.412919 | 5.088824 | -0.19158 |
| H | 2.790685 | 5.62407  | -0.57142 |
| C | 3.264389 | 5.686203 | 1.540158 |
| H | 2.23112  | 5.673805 | 1.904137 |
| H | 3.602434 | 6.728601 | 1.508539 |
| H | 3.879152 | 5.149767 | 2.271227 |
| C | -2.24018 | 5.831055 | -0.45263 |
| H | -1.69042 | 6.221213 | -1.31826 |
| H | -1.83384 | 6.326699 | 0.437994 |
| H | -3.28868 | 6.120686 | -0.55549 |
| C | -4.96812 | -1.44265 | 1.317588 |
| H | -5.35269 | -0.44601 | 1.552597 |
| H | -4.22288 | -1.6835  | 2.085763 |
| C | -6.12311 | -2.4448  | 1.412509 |
| H | -5.82433 | -3.45297 | 1.102248 |
| H | -6.45293 | -2.54396 | 2.455558 |
| C | -7.33907 | -2.0326  | 0.602599 |
| C | -9.44692 | -2.74592 | -0.18971 |
| H | -9.98329 | -1.92493 | 0.29276  |
| H | -10.0365 | -3.66201 | -0.15335 |
| H | -9.22792 | -2.47102 | -1.22455 |
| C | -3.55575 | -3.26394 | -1.72188 |
| H | -3.37423 | -2.50862 | -2.49512 |
| H | -4.57442 | -3.64691 | -1.85373 |
| H | -2.8576  | -4.09128 | -1.89017 |
| C | 1.591023 | -4.83484 | 0.257043 |
| H | 2.561256 | -5.26032 | 0.520734 |
| H | 1.280933 | -5.27127 | -0.70179 |
| H | 0.865834 | -5.16669 | 1.009637 |
| C | 4.198392 | -2.91443 | 0.382103 |
| H | 4.614521 | -2.79646 | 1.383101 |
| C | 5.193689 | -2.59216 | -0.73734 |
| H | 4.736988 | -2.17842 | -1.63325 |
| C | 6.550459 | -2.04403 | -0.45073 |



|   |          |          |          |
|---|----------|----------|----------|
| C | 7.325409 | -2.46988 | 0.640507 |
| H | 6.944659 | -3.23413 | 1.313751 |
| C | 8.587716 | -1.92691 | 0.878419 |
| H | 9.168295 | -2.27316 | 1.729624 |
| C | 9.106859 | -0.94596 | 0.030006 |
| H | 10.09102 | -0.52495 | 0.216195 |
| C | 8.349315 | -0.51443 | -1.05971 |
| H | 8.740917 | 0.24563  | -1.73079 |
| C | 7.085424 | -1.05834 | -1.29536 |
| H | 6.50483  | -0.71987 | -2.15062 |
| C | 4.807206 | -4.02295 | -0.4364  |
| H | 4.184209 | -4.52897 | -1.168   |
| H | 5.54813  | -4.66042 | 0.038996 |

Computed geometry and energy data of **11**.

Electronic energy E = -2030.390044 a.u. Free Energy G = -2029.768864 a.u. Entropy S = 306.376 kcal/mol•K

Table S30. Atom coordinates of **11**.

|   |          |          |          |
|---|----------|----------|----------|
| C | 4.766251 | -2.24988 | -1.12065 |
| C | 5.522793 | -2.2703  | 0.216974 |
| O | 6.913465 | -2.3673  | -0.10721 |
| C | 5.128926 | -3.4331  | 1.129852 |
| C | 7.72653  | -2.39734 | 1.064174 |
| C | 7.318674 | -3.55591 | 1.964957 |
| O | 5.93796  | -3.4576  | 2.301844 |
| H | 4.932399 | -3.20879 | -1.62396 |
| H | 5.245394 | -1.48926 | -1.74824 |
| H | 5.346194 | -1.32959 | 0.764091 |
| H | 5.23567  | -4.38189 | 0.576641 |
| H | 4.093766 | -3.33406 | 1.467564 |
| H | 7.629093 | -1.44812 | 1.61519  |
| H | 8.761755 | -2.50374 | 0.724538 |
| H | 7.875411 | -3.5388  | 2.907157 |
| H | 7.516153 | -4.51171 | 1.452354 |
| N | -1.57243 | -0.66333 | -0.40187 |
| C | -1.47542 | -1.97849 | -0.64755 |
| C | -2.88074 | -0.34354 | -0.19532 |
| C | -2.83896 | -2.66707 | -0.72613 |
| C | -0.27368 | -2.66542 | -0.85325 |
| C | -3.77772 | -1.57541 | -0.14959 |
| C | -3.29548 | 0.966476 | -0.03306 |
| C | -3.18731 | -3.07308 | -2.16937 |
| H | -2.84467 | -3.56915 | -0.10095 |
| C | 1.020922 | -2.14167 | -0.86288 |
| H | -0.34874 | -3.73506 | -1.02348 |
| C | -4.24264 | -1.87671 | 1.295345 |
| H | -4.66521 | -1.43093 | -0.77607 |
| C | -4.71693 | 1.503598 | 0.127642 |
| C | -2.45083 | 2.09397  | -0.02106 |
| H | -4.17721 | -3.54222 | -2.21088 |
| H | -3.19848 | -2.19765 | -2.82878 |

|   |          |          |          |
|---|----------|----------|----------|
| H | -2.45707 | -3.78516 | -2.5692  |
| N | 1.363029 | -0.82588 | -0.69888 |
| C | 2.252404 | -2.87607 | -1.05249 |
| C | -5.2842  | -2.99608 | 1.390787 |
| H | -3.36839 | -2.1501  | 1.898975 |
| H | -4.66359 | -0.97113 | 1.741609 |
| C | -4.56682 | 3.050036 | 0.239715 |
| H | -5.36438 | 1.263765 | -0.7258  |
| H | -5.23828 | 1.125204 | 1.01499  |
| N | -1.13412 | 2.348098 | -0.11401 |
| C | -3.1309  | 3.327777 | 0.140199 |
| C | 2.729499 | -0.65594 | -0.78035 |
| H | 0.692659 | -0.08077 | -0.56068 |
| C | 2.313691 | -4.35886 | -1.26922 |
| C | 3.294266 | -1.97255 | -0.99529 |
| C | -6.64033 | -2.59729 | 0.837253 |
| H | -4.95703 | -3.91141 | 0.88382  |
| H | -5.43853 | -3.28044 | 2.440494 |
| O | -5.49365 | 3.833057 | 0.381206 |
| C | -0.91782 | 3.720889 | -0.01682 |
| H | -0.35267 | 1.708251 | -0.23365 |
| C | -2.19239 | 4.360413 | 0.145152 |
| C | 3.415314 | 0.546995 | -0.7001  |
| H | 2.007001 | -4.91225 | -0.37226 |
| H | 1.649193 | -4.67133 | -2.08369 |
| H | 3.324861 | -4.68532 | -1.52596 |
| O | -7.44777 | -3.67121 | 0.716616 |
| O | -6.98389 | -1.46747 | 0.552111 |
| C | 0.370249 | 4.261771 | -0.07738 |
| C | -2.44441 | 5.829743 | 0.288533 |
| C | 2.905372 | 1.849349 | -0.51858 |
| H | 4.493095 | 0.471555 | -0.8029  |
| C | -8.77916 | -3.40122 | 0.239033 |
| C | 1.550773 | 3.527312 | -0.23833 |
| H | 0.451328 | 5.34069  | 0.008837 |
| H | -2.08523 | 6.38754  | -0.58536 |
| H | -3.51524 | 6.017494 | 0.396444 |
| H | -1.93392 | 6.242617 | 1.167629 |
| C | 3.748333 | 3.046764 | -0.47068 |
| N | 1.594674 | 2.161093 | -0.37531 |
| H | -9.29935 | -2.72132 | 0.918345 |
| H | -8.74492 | -2.9543  | -0.75772 |
| H | -9.27975 | -4.36896 | 0.208025 |
| C | 2.89539  | 4.103635 | -0.29552 |
| C | 5.243346 | 3.060333 | -0.59175 |
| C | 3.230329 | 5.561828 | -0.14623 |
| H | 5.581926 | 2.563173 | -1.50982 |
| H | 5.633407 | 4.082443 | -0.60997 |
| H | 5.725094 | 2.542417 | 0.248321 |
| C | 3.312132 | 6.025838 | 1.321457 |

|   |          |          |          |
|---|----------|----------|----------|
| H | 2.48531  | 6.171377 | -0.67436 |
| H | 4.187744 | 5.76983  | -0.63894 |
| H | 2.362946 | 5.859613 | 1.842669 |
| H | 4.087731 | 5.472697 | 1.862426 |
| H | 3.550623 | 7.094245 | 1.379646 |

---

## References

- 1 Tyurin, V. S.; Erzina, D. R.; Zamilatskov, I. A.; Chernyadyev, A. Y.; Ponomarev, G. V.; Yashunskiy, D. V.; Maksimova, A. V.; Krasnovskiy, A. A.; Tsivadze, A. Y. *Macroheterocycles* **2015**, *8*, 376.
- 2 Shkirdova, A. O.; Zamilatskov, I. A.; Stanetskaya, N. M.; Tafeenko, V. A.; Tyurin, V. S.; Chernyshev, V. V.; Ponomarev, G. V.; Tsivadze, A. Y. *Macroheterocycles* **2017**, *10*, 480.
- 3 Erzina, D. R.; Zamilatskov, I. A.; Stanetskaya, N. M.; Tyurin, V. S.; Kozhemyakin, G. L.; Ponomarev, G. V.; Chernyshev, V. V.; Fitch, A. N. *European Journal of Organic Chemistry* **2019**, *2019*, 1508.
